# Supplementary material for: Ultra-Deep Sequencing Reveals the microRNA Expression Pattern of the Human Stomach
Source: PubMed Central journal article supplement (PMC2951895; doi:10.1371/journal.pone.0013205), 2010-10-08
Supplement: pone.0013205.s001.pdf [file pone.0013205.s001.pdf]

Feuille1

| matureform | miR_Ac | miR_Ac | miR_Al | miR_Al | miR_Al | miR_Al | miR_Al | miR_Al | miR_Al | miR_Al | miR_As | miR_As | miR_As | miR_B | miR_B | miR_B | miR_B | miR_B |      |
|------------|--------|--------|--------|--------|--------|--------|--------|--------|--------|--------|--------|--------|--------|-------|-------|-------|-------|-------|------|
| miR-let-7a | 0.03   | 0.03   | 0.03   | 0.03   | 0.03   | 0      | 0      | 0.02   | 0      | 0.03   | 0.01   | 0.02   | 0.05   | 0.04  | 0.04  | 0.01  | 0.04  | 0.01  | 0.04 |
| miR-let-7b | 0.01   | 0.01   | 0.01   | 0      | 0      | 0.03   | 0      | 0.03   | 0.01   | 0.02   | 0.01   | 0.05   | 0.05   | 0.05  | 0     | 0     | 0.01  | 0.01  | 0.02 |
| miR-let-7c | 0.01   | 0      | 0      | 0      | 0      | 0.02   | 0      | 0.02   | 0      | 0      | 0      | 0      | 0.01   | 0.02  | 0.01  | 0.01  | 0     | 0     | 0    |
| miR-let-7d | 0      | 0      | 0.01   | 0.01   | 0      | 0      | 0      | 0      | 0      | 0.01   | 0      | 0      | 0      | 0.01  | 0     | 0.01  | 0     | 0     | 0    |
| miR-let-7e | 0      | 0      | 0      | 0      | 0      | 0      | 0      | 0      | 0      | 0      | 0      | 0      | 0.01   | 0.01  | 0.01  | 0     | 0     | 0     | 0    |
| miR-let-7f | 0      | 0      | 0.02   | 0.02   | 0.01   | 0      | 0      | 0      | 0      | 0.01   | 0      | 0      | 0.01   | 0     | 0.03  | 0.01  | 0.01  | 0     | 0.01 |
| miR-let-7g | 0      | 0      | 0.01   | 0      | 0.01   | 0      | 0      | 0      | 0      | 0      | 0      | 0      | 0      | 0     | 0     | 0     | 0.01  | 0     | 0    |
| miR-let-7i | 0      | 0      | 0      | 0      | 0      | 0      | 0      | 0      | 0      | 0      | 0      | 0      | 0      | 0     | 0.02  | 0.01  | 0     | 0     | 0.01 |
| miR-1      | 0      | 0      | 0      | 0      | 0      | 0      | 0      | 0      | 0      | 0      | 0      | 0      | 0      | 0     | 0     | 0     | 0     | 0     | 0    |
| miR-100    | 0      | 0      | 0      | 0      | 0      | 0.01   | 0      | 0      | 0      | 0      | 0      | 0.01   | 0      | 0.01  | 0     | 0     | 0     | 0     | 0    |
| miR-100871 | 0      | 0      | 0      | 0      | 0      | 0      | 0      | 0      | 0      | 0      | 0      | 0      | 0      | 0     | 0     | 0     | 0     | 0     | 0    |
| miR-100871 | 0      | 0      | 0      | 0      | 0      | 0      | 0      | 0      | 0      | 0      | 0      | 0      | 0      | 0     | 0     | 0     | 0     | 0     | 0    |
| miR-101    | 0      | 0      | 0      | 0      | 0.01   | 0      | 0      | 0      | 0      | 0.01   | 0      | 0      | 0      | 0.01  | 0     | 0.01  | 0     | 0     | 0    |
| miR-103    | 0      | 0      | 0      | 0.01   | 0.01   | 0      | 0      | 0      | 0      | 0      | 0      | 0      | 0      | 0     | 0     | 0     | 0     | 0     | 0    |
| miR-105    | 0      | 0      | 0      | 0      | 0      | 0      | 0      | 0      | 0      | 0      | 0      | 0      | 0      | 0     | 0     | 0     | 0     | 0     | 0    |
| miR-106a   | 0.01   | 0.01   | 0      | 0      | 0      | 0      | 0      | 0      | 0      | 0      | 0      | 0      | 0      | 0     | 0     | 0     | 0     | 0     | 0    |
| miR-106b   | 0.01   | 0      | 0      | 0.01   | 0.02   | 0      | 0      | 0      | 0.01   | 0      | 0      | 0      | 0      | 0     | 0     | 0     | 0     | 0.01  | 0.01 |
| miR-107    | 0      | 0      | 0      | 0      | 0      | 0      | 0      | 0      | 0      | 0      | 0      | 0      | 0      | 0     | 0     | 0     | 0     | 0     | 0    |
| miR-10a    | 0      | 0      | 0      | 0      | 0      | 0      | 0      | 0      | 0      | 0      | 0      | 0      | 0      | 0     | 0     | 0     | 0     | 0     | 0    |
| miR-10b    | 0      | 0      | 0      | 0      | 0      | 0      | 0      | 0      | 0      | 0      | 0      | 0      | 0      | 0     | 0     | 0     | 0     | 0     | 0    |
| miR-122    | 0      | 0      | 0      | 0      | 0      | 0.05   | 0      | 0.03   | 0      | 0      | 0      | 0      | 0.01   | 0.01  | 0     | 0     | 0     | 0     | 0    |
| miR-124    | 0      | 0      | 0.01   | 0      | 0      | 0      | 0      | 0      | 0      | 0      | 0      | 0      | 0.22   | 0.01  | 0     | 0     | 0     | 0     | 0    |
| miR-125a   | 0      | 0      | 0      | 0      | 0      | 0      | 0      | 0      | 0      | 0      | 0      | 0      | 0      | 0     | 0     | 0     | 0     | 0     | 0    |
| miR-125a   | 0      | 0      | 0      | 0      | 0      | 0      | 0      | 0      | 0      | 0      | 0      | 0      | 0      | 0     | 0     | 0     | 0     | 0     | 0    |
| miR-125b   | 0      | 0      | 0      | 0      | 0      | 0.04   | 0      | 0.01   | 0      | 0      | 0      | 0.06   | 0.03   | 0.04  | 0     | 0     | 0     | 0     | 0    |
| miR-126    | 0      | 0      | 0      | 0.08   | 0      | 0.01   | 0.04   | 0.02   | 0.03   | 0.02   | 0.07   | 0.1    | 0.03   | 0.09  | 0.06  | 0.26  | 0.02  | 0.04  | 0.09 |
| miR-127    | 0      | 0      | 0      | 0      | 0      | 0      | 0      | 0      | 0      | 0      | 0      | 0      | 0      | 0     | 0     | 0     | 0     | 0     | 0    |
| miR-127    | 0      | 0      | 0      | 0      | 0      | 0      | 0      | 0      | 0      | 0      | 0      | 0      | 0      | 0     | 0     | 0     | 0     | 0     | 0    |
| miR-128a   | 0      | 0      | 0      | 0      | 0      | 0      | 0      | 0      | 0      | 0      | 0      | 0      | 0      | 0     | 0     | 0     | 0     | 0     | 0    |
| miR-128b   | 0      | 0      | 0      | 0      | 0      | 0      | 0      | 0      | 0      | 0      | 0      | 0      | 0      | 0     | 0     | 0     | 0.01  | 0     | 0    |
| miR-129    | 0      | 0      | 0      | 0      | 0      | 0      | 0      | 0      | 0      | 0      | 0      | 0      | 0      | 0     | 0     | 0     | 0     | 0     | 0    |
| miR-129    | 0      | 0      | 0      | 0      | 0      | 0      | 0      | 0      | 0      | 0      | 0      | 0      | 0      | 0     | 0     | 0     | 0     | 0     | 0    |
| miR-129    | 0      | 0      | 0      | 0      | 0      | 0      | 0      | 0      | 0      | 0      | 0      | 0      | 0      | 0     | 0     | 0     | 0     | 0     | 0    |
| miR-130a   | 0.05   | 0.06   | 0      | 0.02   | 0      | 0.02   | 0.01   | 0.01   | 0      | 0      | 0      | 0.02   | 0.01   | 0.01  | 0.02  | 0     | 0     | 0     | 0.01 |
| miR-130b   | 0.01   | 0.01   | 0      | 0      | 0      | 0      | 0      | 0      | 0      | 0      | 0      | 0      | 0      | 0     | 0.01  | 0     | 0     | 0     | 0    |

Feuille1

|          |      |      |      |      |      |      |      |      |      |      |      |      |      |      |      |      |      |      |      |
|----------|------|------|------|------|------|------|------|------|------|------|------|------|------|------|------|------|------|------|------|
| miR-132  | 0    | 0    | 0    | 0    | 0    | 0    | 0    | 0    | 0    | 0    | 0    | 0    | 0    | 0    | 0    | 0    | 0    | 0    | 0    |
| miR-133a | 0    | 0    | 0    | 0    | 0    | 0    | 0    | 0    | 0    | 0    | 0    | 0    | 0    | 0    | 0    | 0    | 0    | 0    | 0    |
| miR-133b | 0    | 0    | 0    | 0    | 0    | 0    | 0    | 0    | 0    | 0    | 0    | 0    | 0    | 0    | 0    | 0    | 0    | 0    | 0    |
| miR-134  | 0    | 0    | 0    | 0    | 0    | 0    | 0    | 0    | 0    | 0    | 0    | 0    | 0    | 0    | 0    | 0    | 0    | 0    | 0    |
| miR-135a | 0    | 0    | 0    | 0    | 0    | 0    | 0    | 0    | 0    | 0    | 0    | 0    | 0    | 0    | 0    | 0    | 0    | 0    | 0    |
| miR-135b | 0    | 0    | 0    | 0    | 0    | 0    | 0    | 0    | 0    | 0    | 0    | 0.01 | 0    | 0    | 0    | 0    | 0    | 0    | 0    |
| miR-136  | 0    | 0    | 0    | 0    | 0    | 0    | 0    | 0    | 0    | 0    | 0    | 0.01 | 0.01 | 0.01 | 0    | 0    | 0    | 0    | 0    |
| miR-137  | 0.06 | 0.06 | 0    | 0    | 0    | 0    | 0    | 0    | 0    | 0    | 0    | 0    | 0    | 0    | 0    | 0    | 0    | 0    | 0    |
| miR-138  | 0    | 0    | 0    | 0    | 0    | 0    | 0    | 0    | 0    | 0    | 0    | 0    | 0    | 0.01 | 0    | 0    | 0    | 0    | 0    |
| miR-139  | 0    | 0    | 0    | 0    | 0    | 0    | 0    | 0    | 0    | 0    | 0    | 0    | 0    | 0    | 0    | 0    | 0    | 0    | 0    |
| miR-139  | 0    | 0    | 0    | 0    | 0    | 0    | 0    | 0    | 0    | 0    | 0    | 0    | 0    | 0    | 0    | 0    | 0    | 0    | 0    |
| miR-140  | 0    | 0    | 0    | 0    | 0    | 0    | 0    | 0    | 0    | 0    | 0    | 0    | 0    | 0    | 0    | 0    | 0    | 0    | 0    |
| miR-140  | 0    | 0    | 0.01 | 0    | 0.01 | 0    | 0.01 | 0.01 | 0    | 0.01 | 0.01 | 0.01 | 0.01 | 0.01 | 0    | 0    | 0.01 | 0    | 0.01 |
| miR-141  | 0    | 0    | 0    | 0    | 0    | 0    | 0    | 0.01 | 0    | 0    | 0    | 0    | 0    | 0    | 0    | 0    | 0    | 0    | 0    |
| miR-142  | 0    | 0    | 0.13 | 0.19 | 0.15 | 0    | 0.12 | 0.04 | 0.01 | 0.08 | 0.08 | 0    | 0.01 | 0.01 | 0.07 | 0.16 | 0.1  | 0.11 | 0.1  |
| miR-142  | 0    | 0    | 0.3  | 0.14 | 0.09 | 0.01 | 0.17 | 0.15 | 0.04 | 0.34 | 0.18 | 0.02 | 0.01 | 0    | 0.18 | 0.1  | 0.19 | 0.16 | 0.31 |
| miR-143  | 0    | 0    | 0.01 | 0    | 0    | 0.01 | 0    | 0.04 | 0    | 0    | 0    | 0.02 | 0.01 | 0.02 | 0    | 0    | 0    | 0    | 0    |
| miR-144  | 0    | 0    | 0    | 0    | 0    | 0    | 0.16 | 0    | 0.28 | 0.02 | 0.04 | 0.01 | 0.02 | 0.02 | 0    | 0.01 | 0.02 | 0.09 | 0    |
| miR-145  | 0    | 0    | 0    | 0    | 0    | 0    | 0    | 0    | 0    | 0    | 0    | 0    | 0    | 0    | 0    | 0    | 0    | 0    | 0    |
| miR-146a | 0    | 0    | 0    | 0.01 | 0.01 | 0    | 0    | 0    | 0    | 0    | 0    | 0    | 0    | 0    | 0    | 0.02 | 0    | 0    | 0.01 |
| miR-146b | 0    | 0    | 0    | 0    | 0    | 0    | 0    | 0    | 0    | 0    | 0    | 0    | 0    | 0    | 0    | 0    | 0    | 0    | 0    |
| miR-146b | 0    | 0    | 0    | 0    | 0    | 0    | 0    | 0    | 0    | 0    | 0    | 0    | 0    | 0    | 0    | 0    | 0    | 0    | 0    |
| miR-147a | 0    | 0    | 0    | 0    | 0    | 0    | 0    | 0    | 0    | 0    | 0    | 0    | 0    | 0    | 0    | 0    | 0    | 0    | 0    |
| miR-147b | 0    | 0    | 0    | 0    | 0    | 0    | 0    | 0    | 0    | 0    | 0    | 0    | 0    | 0    | 0    | 0    | 0    | 0    | 0    |
| miR-148a | 0    | 0    | 0    | 0    | 0    | 0    | 0    | 0    | 0    | 0    | 0    | 0    | 0    | 0    | 0    | 0    | 0    | 0    | 0    |
| miR-148b | 0    | 0    | 0    | 0    | 0    | 0    | 0    | 0    | 0    | 0    | 0    | 0    | 0    | 0    | 0    | 0    | 0    | 0    | 0    |
| miR-149  | 0    | 0    | 0    | 0    | 0    | 0    | 0    | 0    | 0    | 0    | 0    | 0    | 0    | 0    | 0    | 0    | 0    | 0    | 0    |
| miR-150  | 0    | 0    | 0    | 0    | 0    | 0    | 0    | 0    | 0    | 0    | 0    | 0    | 0    | 0    | 0.01 | 0    | 0    | 0    | 0.01 |
| miR-151  | 0    | 0    | 0    | 0.01 | 0    | 0    | 0    | 0    | 0    | 0    | 0    | 0    | 0    | 0    | 0    | 0    | 0    | 0    | 0    |
| miR-151  | 0.01 | 0.01 | 0    | 0.01 | 0    | 0    | 0    | 0    | 0    | 0    | 0    | 0    | 0    | 0    | 0    | 0    | 0    | 0    | 0    |
| miR-152  | 0    | 0    | 0    | 0    | 0    | 0    | 0    | 0    | 0    | 0    | 0    | 0    | 0    | 0    | 0    | 0    | 0    | 0    | 0    |
| miR-153  | 0    | 0    | 0    | 0    | 0    | 0    | 0    | 0    | 0    | 0    | 0    | 0.02 | 0    | 0    | 0    | 0    | 0    | 0    | 0    |
| miR-154  | 0    | 0    | 0    | 0    | 0    | 0    | 0    | 0    | 0    | 0    | 0    | 0    | 0    | 0    | 0    | 0    | 0    | 0    | 0    |
| miR-155  | 0    | 0    | 0    | 0    | 0    | 0    | 0    | 0    | 0    | 0    | 0    | 0    | 0    | 0    | 0    | 0    | 0    | 0    | 0    |
| miR-15a  | 0.01 | 0.01 | 0.05 | 0.07 | 0.06 | 0.1  | 0.08 | 0.08 | 0.09 | 0.05 | 0.12 | 0.03 | 0.01 | 0.03 | 0.04 | 0.02 | 0.08 | 0.11 | 0.03 |
| miR-15b  | 0.01 | 0.01 | 0.01 | 0.01 | 0.02 | 0    | 0    | 0.01 | 0    | 0    | 0    | 0    | 0    | 0    | 0.01 | 0.01 | 0    | 0    | 0    |

Feuille1

|          |      |      |      |      |      |      |      |      |      |      |      |      |      |      |      |      |      |      |      |
|----------|------|------|------|------|------|------|------|------|------|------|------|------|------|------|------|------|------|------|------|
| miR-16   | 0.09 | 0.07 | 0.12 | 0.1  | 0.14 | 0.22 | 0.16 | 0.14 | 0.34 | 0.1  | 0.19 | 0.05 | 0.03 | 0.03 | 0.17 | 0.09 | 0.1  | 0.21 | 0.08 |
| miR-17   | 0.02 | 0.02 | 0.01 | 0.01 | 0.01 | 0    | 0.01 | 0    | 0.01 | 0    | 0.01 | 0    | 0    | 0    | 0.02 | 0.03 | 0.01 | 0.02 | 0    |
| miR-181a | 0    | 0    | 0.02 | 0    | 0    | 0    | 0    | 0.01 | 0    | 0.06 | 0.01 | 0.02 | 0.01 | 0.02 | 0.01 | 0.02 | 0.13 | 0    | 0.02 |
| miR-181b | 0    | 0    | 0    | 0.01 | 0    | 0    | 0    | 0    | 0    | 0.01 | 0    | 0    | 0    | 0    | 0    | 0    | 0.01 | 0    | 0    |
| miR-181c | 0    | 0    | 0    | 0    | 0    | 0    | 0    | 0    | 0    | 0    | 0    | 0    | 0    | 0    | 0    | 0    | 0    | 0    | 0    |
| miR-181d | 0    | 0    | 0    | 0    | 0    | 0    | 0    | 0    | 0    | 0    | 0    | 0    | 0    | 0    | 0    | 0    | 0    | 0    | 0    |
| miR-182  | 0    | 0    | 0    | 0    | 0    | 0    | 0    | 0    | 0    | 0    | 0    | 0    | 0    | 0    | 0    | 0    | 0    | 0    | 0    |
| miR-183  | 0    | 0    | 0    | 0    | 0    | 0    | 0    | 0    | 0    | 0    | 0    | 0    | 0    | 0    | 0    | 0    | 0    | 0    | 0    |
| miR-184  | 0    | 0    | 0    | 0    | 0    | 0    | 0    | 0    | 0    | 0    | 0    | 0    | 0    | 0    | 0    | 0    | 0    | 0    | 0    |
| miR-185  | 0    | 0    | 0    | 0    | 0    | 0    | 0.01 | 0    | 0    | 0    | 0    | 0    | 0    | 0    | 0    | 0    | 0    | 0.01 | 0    |
| miR-186  | 0    | 0    | 0    | 0    | 0    | 0    | 0    | 0    | 0    | 0    | 0    | 0    | 0    | 0    | 0.01 | 0.01 | 0    | 0    | 0.01 |
| miR-187  | 0    | 0    | 0    | 0    | 0    | 0    | 0    | 0    | 0    | 0    | 0    | 0    | 0    | 0    | 0    | 0    | 0    | 0    | 0    |
| miR-188  | 0    | 0    | 0    | 0    | 0    | 0    | 0    | 0    | 0    | 0    | 0    | 0    | 0    | 0    | 0    | 0    | 0    | 0    | 0    |
| miR-188  | 0    | 0    | 0    | 0    | 0    | 0    | 0    | 0    | 0    | 0    | 0    | 0    | 0    | 0    | 0    | 0    | 0    | 0    | 0    |
| miR-18a  | 0.01 | 0.01 | 0    | 0    | 0.01 | 0    | 0.01 | 0    | 0    | 0    | 0    | 0    | 0    | 0    | 0.01 | 0    | 0    | 0    | 0    |
| miR-18b  | 0    | 0.01 | 0    | 0    | 0    | 0    | 0    | 0    | 0    | 0    | 0    | 0    | 0    | 0    | 0    | 0    | 0    | 0    | 0    |
| miR-190  | 0    | 0    | 0    | 0    | 0    | 0    | 0    | 0    | 0    | 0    | 0    | 0    | 0    | 0    | 0    | 0    | 0    | 0    | 0    |
| miR-190b | 0    | 0    | 0    | 0    | 0    | 0    | 0    | 0    | 0    | 0    | 0    | 0    | 0    | 0    | 0    | 0    | 0    | 0    | 0    |
| miR-191  | 0.01 | 0.01 | 0.03 | 0.02 | 0.04 | 0.01 | 0    | 0.03 | 0    | 0.03 | 0.01 | 0    | 0    | 0    | 0.01 | 0    | 0.05 | 0.01 | 0.02 |
| miR-192  | 0    | 0    | 0    | 0    | 0    | 0    | 0    | 0    | 0    | 0    | 0    | 0    | 0    | 0    | 0    | 0    | 0    | 0    | 0    |
| miR-193a | 0    | 0    | 0    | 0    | 0    | 0    | 0    | 0    | 0    | 0    | 0    | 0    | 0    | 0    | 0    | 0    | 0    | 0    | 0    |
| miR-193a | 0    | 0    | 0    | 0    | 0    | 0    | 0    | 0    | 0    | 0    | 0    | 0    | 0    | 0    | 0    | 0    | 0    | 0    | 0    |
| miR-193b | 0    | 0    | 0    | 0    | 0    | 0    | 0    | 0    | 0    | 0    | 0    | 0    | 0    | 0    | 0    | 0    | 0    | 0    | 0    |
| miR-194  | 0    | 0    | 0    | 0    | 0    | 0    | 0    | 0    | 0    | 0    | 0    | 0    | 0    | 0    | 0    | 0    | 0    | 0    | 0    |
| miR-195  | 0    | 0    | 0    | 0    | 0    | 0.01 | 0    | 0.01 | 0    | 0    | 0    | 0.01 | 0    | 0    | 0    | 0    | 0    | 0    | 0    |
| miR-196a | 0.01 | 0.01 | 0    | 0    | 0    | 0    | 0    | 0    | 0    | 0    | 0    | 0    | 0    | 0    | 0    | 0    | 0    | 0    | 0    |
| miR-196b | 0    | 0    | 0    | 0    | 0    | 0    | 0    | 0    | 0    | 0    | 0    | 0    | 0    | 0    | 0.01 | 0    | 0.01 | 0    | 0    |
| miR-197  | 0    | 0    | 0    | 0    | 0    | 0    | 0    | 0    | 0    | 0    | 0    | 0    | 0    | 0    | 0    | 0    | 0    | 0    | 0    |
| miR-198  | 0    | 0    | 0    | 0    | 0    | 0    | 0    | 0    | 0    | 0    | 0    | 0    | 0    | 0    | 0    | 0    | 0    | 0    | 0    |
| miR-199a | 0    | 0    | 0    | 0    | 0    | 0    | 0    | 0    | 0    | 0    | 0    | 0    | 0    | 0    | 0    | 0    | 0    | 0    | 0    |
| miR-199a | 0    | 0    | 0    | 0    | 0    | 0    | 0    | 0    | 0    | 0    | 0    | 0    | 0    | 0    | 0    | 0    | 0    | 0    | 0    |
| miR-199b | 0    | 0    | 0    | 0    | 0    | 0    | 0    | 0    | 0    | 0    | 0    | 0    | 0    | 0    | 0    | 0    | 0    | 0    | 0    |
| miR-199b | 0    | 0    | 0    | 0    | 0    | 0    | 0    | 0    | 0    | 0    | 0    | 0    | 0    | 0    | 0    | 0    | 0    | 0    | 0    |
| miR-19a  | 0.01 | 0    | 0    | 0.01 | 0.01 | 0    | 0    | 0    | 0    | 0    | 0    | 0    | 0    | 0    | 0.01 | 0.01 | 0    | 0    | 0    |
| miR-19b  | 0.01 | 0.01 | 0.01 | 0    | 0.04 | 0    | 0    | 0    | 0    | 0    | 0    | 0    | 0    | 0    | 0.02 | 0.02 | 0.01 | 0    | 0.01 |
| miR-200a | 0    | 0    | 0    | 0    | 0    | 0    | 0    | 0    | 0    | 0    | 0    | 0    | 0    | 0    | 0    | 0    | 0    | 0    | 0    |

Feuille1

|          |      |      |      |      |      |      |      |      |      |      |      |      |      |      |      |      |      |      |      |
|----------|------|------|------|------|------|------|------|------|------|------|------|------|------|------|------|------|------|------|------|
| miR-200b | 0    | 0    | 0    | 0    | 0    | 0    | 0    | 0    | 0    | 0    | 0    | 0    | 0    | 0    | 0    | 0    | 0    | 0    | 0    |
| miR-200c | 0    | 0    | 0    | 0    | 0    | 0    | 0    | 0    | 0    | 0    | 0    | 0    | 0    | 0    | 0    | 0    | 0    | 0    | 0    |
| miR-202  | 0    | 0    | 0    | 0    | 0    | 0    | 0    | 0    | 0    | 0    | 0    | 0    | 0    | 0    | 0    | 0    | 0    | 0    | 0    |
| miR-203  | 0    | 0    | 0    | 0    | 0    | 0    | 0    | 0    | 0    | 0    | 0    | 0    | 0    | 0    | 0    | 0    | 0    | 0    | 0    |
| miR-204  | 0    | 0    | 0    | 0    | 0    | 0    | 0    | 0    | 0    | 0    | 0    | 0    | 0    | 0    | 0    | 0    | 0    | 0    | 0    |
| miR-205  | 0    | 0    | 0    | 0    | 0    | 0    | 0    | 0    | 0    | 0    | 0    | 0    | 0    | 0    | 0    | 0    | 0    | 0    | 0    |
| miR-206  | 0    | 0    | 0    | 0    | 0    | 0    | 0    | 0    | 0    | 0    | 0    | 0    | 0    | 0    | 0    | 0    | 0    | 0    | 0    |
| miR-208  | 0    | 0    | 0    | 0    | 0    | 0    | 0    | 0    | 0    | 0    | 0    | 0    | 0    | 0    | 0    | 0    | 0    | 0    | 0    |
| miR-208b | 0    | 0    | 0    | 0    | 0    | 0    | 0    | 0    | 0    | 0    | 0    | 0    | 0    | 0    | 0    | 0    | 0    | 0    | 0    |
| miR-20a  | 0.01 | 0.01 | 0.01 | 0.03 | 0.02 | 0    | 0.01 | 0    | 0.01 | 0.01 | 0    | 0    | 0    | 0    | 0.01 | 0.01 | 0.01 | 0    | 0.01 |
| miR-20b  | 0.02 | 0.03 | 0    | 0    | 0    | 0    | 0    | 0    | 0    | 0    | 0    | 0    | 0    | 0    | 0    | 0    | 0    | 0    | 0    |
| miR-21   | 0.19 | 0.16 | 0    | 0    | 0.01 | 0.02 | 0.01 | 0.02 | 0    | 0.05 | 0.01 | 0.08 | 0.01 | 0.02 | 0.01 | 0.01 | 0.01 | 0.02 | 0.01 |
| miR-210  | 0    | 0    | 0    | 0    | 0    | 0    | 0    | 0    | 0    | 0    | 0    | 0    | 0    | 0    | 0    | 0    | 0    | 0    | 0    |
| miR-211  | 0    | 0    | 0    | 0    | 0    | 0    | 0    | 0    | 0    | 0    | 0    | 0    | 0    | 0    | 0    | 0    | 0    | 0    | 0    |
| miR-212  | 0    | 0    | 0    | 0    | 0    | 0    | 0    | 0    | 0    | 0    | 0    | 0    | 0    | 0    | 0    | 0    | 0    | 0    | 0    |
| miR-214  | 0    | 0.01 | 0    | 0    | 0    | 0    | 0    | 0    | 0    | 0    | 0    | 0    | 0    | 0    | 0    | 0    | 0    | 0    | 0    |
| miR-215  | 0    | 0    | 0    | 0    | 0    | 0    | 0    | 0    | 0    | 0    | 0    | 0    | 0    | 0    | 0    | 0    | 0    | 0    | 0    |
| miR-216a | 0    | 0    | 0    | 0    | 0    | 0    | 0    | 0    | 0    | 0    | 0    | 0    | 0    | 0    | 0    | 0    | 0    | 0    | 0    |
| miR-216b | 0    | 0    | 0    | 0    | 0    | 0    | 0    | 0    | 0    | 0    | 0    | 0    | 0    | 0    | 0    | 0    | 0    | 0    | 0    |
| miR-217  | 0    | 0    | 0    | 0    | 0    | 0    | 0    | 0    | 0    | 0    | 0    | 0    | 0    | 0    | 0    | 0    | 0    | 0    | 0    |
| miR-218  | 0    | 0    | 0    | 0    | 0    | 0    | 0    | 0    | 0    | 0    | 0    | 0    | 0    | 0    | 0    | 0    | 0    | 0    | 0    |
| miR-219  | 0    | 0    | 0    | 0    | 0    | 0    | 0    | 0    | 0    | 0    | 0    | 0    | 0    | 0    | 0    | 0    | 0    | 0    | 0    |
| miR-219  | 0    | 0    | 0    | 0    | 0    | 0    | 0    | 0    | 0    | 0    | 0    | 0    | 0    | 0    | 0    | 0    | 0    | 0    | 0    |
| miR-22   | 0.01 | 0    | 0    | 0    | 0    | 0.02 | 0    | 0.01 | 0.01 | 0    | 0.01 | 0.01 | 0.01 | 0.03 | 0    | 0    | 0    | 0    | 0.01 |
| miR-220  | 0    | 0    | 0    | 0    | 0    | 0    | 0    | 0    | 0    | 0    | 0    | 0    | 0    | 0    | 0    | 0    | 0    | 0    | 0    |
| miR-220b | 0    | 0    | 0    | 0    | 0    | 0    | 0    | 0    | 0    | 0    | 0    | 0    | 0    | 0    | 0    | 0    | 0    | 0    | 0    |
| miR-220c | 0    | 0    | 0    | 0    | 0    | 0    | 0    | 0    | 0    | 0    | 0    | 0    | 0    | 0    | 0    | 0    | 0    | 0    | 0    |
| miR-221  | 0.01 | 0.01 | 0    | 0    | 0    | 0    | 0    | 0    | 0    | 0    | 0    | 0    | 0    | 0    | 0    | 0    | 0    | 0    | 0    |
| miR-222  | 0    | 0    | 0    | 0    | 0    | 0    | 0    | 0    | 0    | 0    | 0    | 0    | 0    | 0    | 0    | 0    | 0    | 0    | 0    |
| miR-223  | 0    | 0    | 0.02 | 0.01 | 0    | 0    | 0    | 0.01 | 0    | 0    | 0.01 | 0    | 0    | 0    | 0    | 0.01 | 0    | 0    | 0    |
| miR-224  | 0    | 0    | 0    | 0    | 0    | 0    | 0    | 0    | 0    | 0    | 0    | 0    | 0    | 0    | 0    | 0    | 0    | 0    | 0    |
| miR-23a  | 0.01 | 0.02 | 0.01 | 0    | 0.01 | 0    | 0    | 0.01 | 0    | 0    | 0    | 0    | 0    | 0    | 0    | 0    | 0    | 0    | 0    |
| miR-23b  | 0    | 0    | 0    | 0    | 0    | 0.01 | 0    | 0.01 | 0    | 0    | 0    | 0    | 0    | 0    | 0    | 0    | 0    | 0    | 0    |
| miR-24   | 0.02 | 0.04 | 0.01 | 0.01 | 0.01 | 0.02 | 0    | 0.02 | 0    | 0    | 0.01 | 0    | 0.01 | 0    | 0.02 | 0.01 | 0.01 | 0.01 | 0    |
| miR-25   | 0    | 0.01 | 0.01 | 0    | 0    | 0.01 | 0    | 0    | 0.01 | 0    | 0    | 0    | 0    | 0    | 0.02 | 0    | 0    | 0    | 0    |
| miR-26a  | 0.01 | 0.01 | 0    | 0.01 | 0.01 | 0    | 0.01 | 0.01 | 0    | 0    | 0.01 | 0.01 | 0    | 0    | 0.01 | 0    | 0    | 0    | 0    |

Feuille1

|          |      |      |      |      |      |      |      |      |      |      |      |      |      |      |      |      |      |      |      |
|----------|------|------|------|------|------|------|------|------|------|------|------|------|------|------|------|------|------|------|------|
| miR-26b  | 0.02 | 0.01 | 0    | 0    | 0.01 | 0    | 0    | 0    | 0    | 0    | 0    | 0    | 0    | 0    | 0.01 | 0    | 0    | 0.01 |      |
| miR-27a  | 0.01 | 0.02 | 0.03 | 0.03 | 0.01 | 0.02 | 0.01 | 0.05 | 0    | 0    | 0.03 | 0.01 | 0.01 | 0.01 | 0    | 0.01 | 0.01 | 0.02 | 0    |
| miR-27b  | 0    | 0    | 0    | 0    | 0    | 0.02 | 0    | 0.02 | 0    | 0    | 0    | 0    | 0    | 0    | 0    | 0    | 0    | 0    | 0    |
| miR-28   | 0    | 0    | 0    | 0    | 0    | 0    | 0    | 0    | 0    | 0    | 0    | 0    | 0    | 0    | 0    | 0    | 0    | 0    | 0    |
| miR-28   | 0    | 0    | 0    | 0    | 0    | 0    | 0    | 0    | 0    | 0    | 0.01 | 0.01 | 0    | 0.01 | 0    | 0    | 0    | 0    | 0.01 |
| miR-296  | 0    | 0    | 0    | 0    | 0    | 0    | 0    | 0    | 0    | 0    | 0    | 0    | 0    | 0    | 0    | 0    | 0    | 0    | 0    |
| miR-296  | 0    | 0    | 0    | 0    | 0    | 0    | 0    | 0    | 0    | 0    | 0    | 0    | 0    | 0    | 0    | 0    | 0    | 0    | 0    |
| miR-298  | 0    | 0    | 0    | 0    | 0    | 0    | 0    | 0    | 0    | 0    | 0    | 0    | 0    | 0    | 0    | 0    | 0    | 0    | 0    |
| miR-299  | 0    | 0    | 0    | 0    | 0    | 0    | 0    | 0    | 0    | 0    | 0    | 0    | 0    | 0    | 0    | 0    | 0    | 0    | 0    |
| miR-299  | 0    | 0    | 0    | 0    | 0    | 0    | 0    | 0    | 0    | 0    | 0    | 0    | 0    | 0    | 0    | 0    | 0    | 0    | 0    |
| miR-29a  | 0.01 | 0.01 | 0    | 0    | 0    | 0    | 0    | 0.01 | 0    | 0    | 0    | 0.03 | 0.01 | 0.01 | 0    | 0    | 0    | 0    | 0.01 |
| miR-29b  | 0.01 | 0.01 | 0.02 | 0.01 | 0.01 | 0.02 | 0    | 0.01 | 0    | 0.01 | 0.01 | 0.01 | 0.03 | 0.04 | 0.02 | 0    | 0.01 | 0    | 0.02 |
| miR-29c  | 0    | 0    | 0    | 0    | 0    | 0    | 0    | 0    | 0    | 0    | 0    | 0    | 0    | 0    | 0    | 0    | 0    | 0    | 0    |
| miR-300  | 0    | 0    | 0    | 0    | 0    | 0    | 0    | 0    | 0    | 0    | 0    | 0    | 0    | 0    | 0    | 0    | 0    | 0    | 0    |
| miR-301a | 0.02 | 0.02 | 0    | 0    | 0    | 0    | 0    | 0    | 0    | 0    | 0    | 0    | 0    | 0    | 0    | 0    | 0    | 0    | 0    |
| miR-301b | 0    | 0.01 | 0    | 0    | 0    | 0    | 0    | 0    | 0    | 0    | 0    | 0    | 0    | 0    | 0.01 | 0    | 0    | 0    | 0    |
| miR-302a | 0    | 0    | 0    | 0    | 0    | 0    | 0    | 0    | 0    | 0    | 0    | 0    | 0    | 0    | 0    | 0    | 0    | 0    | 0    |
| miR-302b | 0    | 0    | 0    | 0    | 0    | 0    | 0    | 0    | 0    | 0    | 0    | 0    | 0    | 0    | 0    | 0    | 0    | 0    | 0    |
| miR-302c | 0    | 0    | 0    | 0    | 0    | 0    | 0    | 0    | 0    | 0    | 0    | 0    | 0    | 0    | 0    | 0    | 0    | 0    | 0    |
| miR-302d | 0    | 0    | 0    | 0    | 0    | 0    | 0    | 0    | 0    | 0    | 0    | 0    | 0    | 0    | 0    | 0    | 0    | 0    | 0    |
| miR-30a  | 0.05 | 0.05 | 0    | 0    | 0    | 0.01 | 0    | 0    | 0    | 0    | 0    | 0.01 | 0.01 | 0.01 | 0    | 0    | 0    | 0    | 0    |
| miR-30b  | 0    | 0    | 0    | 0.01 | 0    | 0    | 0    | 0    | 0    | 0    | 0    | 0    | 0    | 0    | 0    | 0    | 0    | 0    | 0    |
| miR-30c  | 0.04 | 0.02 | 0    | 0    | 0.02 | 0    | 0    | 0    | 0    | 0    | 0    | 0    | 0    | 0    | 0.01 | 0    | 0    | 0    | 0    |
| miR-30d  | 0    | 0    | 0.01 | 0.02 | 0    | 0.01 | 0.01 | 0    | 0.01 | 0    | 0.01 | 0.02 | 0.01 | 0.01 | 0.01 | 0.01 | 0.01 | 0    | 0.01 |
| miR-30e  | 0    | 0    | 0    | 0    | 0.05 | 0.01 | 0.01 | 0.01 | 0    | 0.03 | 0.01 | 0.02 | 0.01 | 0.01 | 0    | 0.02 | 0.02 | 0    | 0.01 |
| miR-31   | 0    | 0    | 0    | 0    | 0    | 0    | 0    | 0    | 0    | 0    | 0    | 0    | 0    | 0    | 0    | 0    | 0    | 0    | 0    |
| miR-32   | 0    | 0    | 0.01 | 0.02 | 0.01 | 0    | 0.01 | 0.01 | 0    | 0.01 | 0    | 0.01 | 0.01 | 0.01 | 0    | 0.01 | 0.01 | 0.01 | 0.01 |
| miR-320  | 0.01 | 0    | 0    | 0    | 0    | 0    | 0    | 0    | 0    | 0    | 0    | 0    | 0    | 0.01 | 0    | 0    | 0    | 0    | 0    |
| miR-323  | 0    | 0    | 0    | 0    | 0    | 0    | 0    | 0    | 0    | 0    | 0    | 0    | 0    | 0    | 0    | 0    | 0    | 0    | 0    |
| miR-323  | 0    | 0    | 0    | 0    | 0    | 0    | 0    | 0    | 0    | 0    | 0    | 0    | 0    | 0    | 0    | 0    | 0    | 0    | 0    |
| miR-324  | 0    | 0    | 0    | 0    | 0    | 0    | 0    | 0    | 0    | 0    | 0    | 0    | 0    | 0    | 0    | 0    | 0    | 0    | 0    |
| miR-324  | 0    | 0.01 | 0    | 0    | 0    | 0    | 0    | 0    | 0    | 0    | 0    | 0    | 0    | 0    | 0    | 0    | 0    | 0    | 0    |
| miR-325  | 0    | 0    | 0    | 0    | 0    | 0    | 0    | 0    | 0    | 0    | 0    | 0    | 0    | 0    | 0    | 0    | 0    | 0    | 0    |
| miR-325  | 0    | 0    | 0    | 0    | 0    | 0    | 0    | 0    | 0    | 0    | 0    | 0    | 0    | 0    | 0    | 0    | 0    | 0    | 0    |
| miR-326  | 0    | 0    | 0    | 0.01 | 0    | 0    | 0    | 0    | 0    | 0    | 0    | 0    | 0    | 0    | 0    | 0    | 0    | 0    | 0    |
| miR-328  | 0    | 0    | 0    | 0    | 0    | 0    | 0    | 0    | 0    | 0    | 0    | 0    | 0    | 0    | 0    | 0    | 0    | 0    | 0    |

Feuille1

|         |      |      |   |      |   |   |   |   |   |   |      |   |   |   |      |   |   |   |   |
|---------|------|------|---|------|---|---|---|---|---|---|------|---|---|---|------|---|---|---|---|
| miR-329 | 0    | 0    | 0 | 0    | 0 | 0 | 0 | 0 | 0 | 0 | 0    | 0 | 0 | 0 | 0    | 0 | 0 | 0 | 0 |
| miR-330 | 0    | 0    | 0 | 0    | 0 | 0 | 0 | 0 | 0 | 0 | 0    | 0 | 0 | 0 | 0    | 0 | 0 | 0 | 0 |
| miR-330 | 0    | 0    | 0 | 0    | 0 | 0 | 0 | 0 | 0 | 0 | 0    | 0 | 0 | 0 | 0    | 0 | 0 | 0 | 0 |
| miR-331 | 0    | 0    | 0 | 0    | 0 | 0 | 0 | 0 | 0 | 0 | 0    | 0 | 0 | 0 | 0    | 0 | 0 | 0 | 0 |
| miR-331 | 0    | 0    | 0 | 0    | 0 | 0 | 0 | 0 | 0 | 0 | 0    | 0 | 0 | 0 | 0    | 0 | 0 | 0 | 0 |
| miR-335 | 0    | 0    | 0 | 0    | 0 | 0 | 0 | 0 | 0 | 0 | 0    | 0 | 0 | 0 | 0    | 0 | 0 | 0 | 0 |
| miR-337 | 0    | 0    | 0 | 0    | 0 | 0 | 0 | 0 | 0 | 0 | 0    | 0 | 0 | 0 | 0    | 0 | 0 | 0 | 0 |
| miR-337 | 0    | 0    | 0 | 0    | 0 | 0 | 0 | 0 | 0 | 0 | 0    | 0 | 0 | 0 | 0    | 0 | 0 | 0 | 0 |
| miR-338 | 0    | 0    | 0 | 0    | 0 | 0 | 0 | 0 | 0 | 0 | 0    | 0 | 0 | 0 | 0    | 0 | 0 | 0 | 0 |
| miR-338 | 0    | 0    | 0 | 0    | 0 | 0 | 0 | 0 | 0 | 0 | 0    | 0 | 0 | 0 | 0    | 0 | 0 | 0 | 0 |
| miR-339 | 0    | 0    | 0 | 0    | 0 | 0 | 0 | 0 | 0 | 0 | 0    | 0 | 0 | 0 | 0    | 0 | 0 | 0 | 0 |
| miR-339 | 0    | 0    | 0 | 0    | 0 | 0 | 0 | 0 | 0 | 0 | 0    | 0 | 0 | 0 | 0    | 0 | 0 | 0 | 0 |
| miR-33a | 0    | 0    | 0 | 0    | 0 | 0 | 0 | 0 | 0 | 0 | 0    | 0 | 0 | 0 | 0    | 0 | 0 | 0 | 0 |
| miR-33b | 0    | 0    | 0 | 0    | 0 | 0 | 0 | 0 | 0 | 0 | 0    | 0 | 0 | 0 | 0    | 0 | 0 | 0 | 0 |
| miR-340 | 0    | 0    | 0 | 0.01 | 0 | 0 | 0 | 0 | 0 | 0 | 0    | 0 | 0 | 0 | 0    | 0 | 0 | 0 | 0 |
| miR-342 | 0    | 0    | 0 | 0    | 0 | 0 | 0 | 0 | 0 | 0 | 0    | 0 | 0 | 0 | 0    | 0 | 0 | 0 | 0 |
| miR-342 | 0    | 0    | 0 | 0    | 0 | 0 | 0 | 0 | 0 | 0 | 0    | 0 | 0 | 0 | 0    | 0 | 0 | 0 | 0 |
| miR-345 | 0    | 0    | 0 | 0    | 0 | 0 | 0 | 0 | 0 | 0 | 0    | 0 | 0 | 0 | 0    | 0 | 0 | 0 | 0 |
| miR-346 | 0    | 0    | 0 | 0    | 0 | 0 | 0 | 0 | 0 | 0 | 0    | 0 | 0 | 0 | 0    | 0 | 0 | 0 | 0 |
| miR-34a | 0    | 0    | 0 | 0    | 0 | 0 | 0 | 0 | 0 | 0 | 0.01 | 0 | 0 | 0 | 0    | 0 | 0 | 0 | 0 |
| miR-34b | 0    | 0    | 0 | 0    | 0 | 0 | 0 | 0 | 0 | 0 | 0    | 0 | 0 | 0 | 0    | 0 | 0 | 0 | 0 |
| miR-34c | 0    | 0    | 0 | 0    | 0 | 0 | 0 | 0 | 0 | 0 | 0    | 0 | 0 | 0 | 0    | 0 | 0 | 0 | 0 |
| miR-34c | 0    | 0    | 0 | 0    | 0 | 0 | 0 | 0 | 0 | 0 | 0    | 0 | 0 | 0 | 0    | 0 | 0 | 0 | 0 |
| miR-361 | 0    | 0    | 0 | 0    | 0 | 0 | 0 | 0 | 0 | 0 | 0    | 0 | 0 | 0 | 0    | 0 | 0 | 0 | 0 |
| miR-361 | 0    | 0    | 0 | 0    | 0 | 0 | 0 | 0 | 0 | 0 | 0    | 0 | 0 | 0 | 0    | 0 | 0 | 0 | 0 |
| miR-362 | 0    | 0    | 0 | 0    | 0 | 0 | 0 | 0 | 0 | 0 | 0    | 0 | 0 | 0 | 0    | 0 | 0 | 0 | 0 |
| miR-362 | 0    | 0    | 0 | 0    | 0 | 0 | 0 | 0 | 0 | 0 | 0    | 0 | 0 | 0 | 0    | 0 | 0 | 0 | 0 |
| miR-363 | 0.04 | 0.02 | 0 | 0    | 0 | 0 | 0 | 0 | 0 | 0 | 0    | 0 | 0 | 0 | 0.01 | 0 | 0 | 0 | 0 |
| miR-365 | 0    | 0    | 0 | 0    | 0 | 0 | 0 | 0 | 0 | 0 | 0    | 0 | 0 | 0 | 0    | 0 | 0 | 0 | 0 |
| miR-367 | 0    | 0    | 0 | 0    | 0 | 0 | 0 | 0 | 0 | 0 | 0    | 0 | 0 | 0 | 0    | 0 | 0 | 0 | 0 |
| miR-368 | 0    | 0    | 0 | 0    | 0 | 0 | 0 | 0 | 0 | 0 | 0    | 0 | 0 | 0 | 0    | 0 | 0 | 0 | 0 |
| miR-369 | 0    | 0    | 0 | 0    | 0 | 0 | 0 | 0 | 0 | 0 | 0    | 0 | 0 | 0 | 0    | 0 | 0 | 0 | 0 |
| miR-369 | 0    | 0    | 0 | 0    | 0 | 0 | 0 | 0 | 0 | 0 | 0    | 0 | 0 | 0 | 0    | 0 | 0 | 0 | 0 |
| miR-370 | 0    | 0    | 0 | 0    | 0 | 0 | 0 | 0 | 0 | 0 | 0    | 0 | 0 | 0 | 0    | 0 | 0 | 0 | 0 |
| miR-371 | 0    | 0    | 0 | 0    | 0 | 0 | 0 | 0 | 0 | 0 | 0    | 0 | 0 | 0 | 0    | 0 | 0 | 0 | 0 |
| miR-371 | 0    | 0    | 0 | 0    | 0 | 0 | 0 | 0 | 0 | 0 | 0    | 0 | 0 | 0 | 0    | 0 | 0 | 0 | 0 |

Feuille1

|          |      |      |      |      |      |   |      |   |   |   |      |   |   |      |      |      |      |      |      |
|----------|------|------|------|------|------|---|------|---|---|---|------|---|---|------|------|------|------|------|------|
| miR-372  | 0    | 0    | 0    | 0    | 0    | 0 | 0    | 0 | 0 | 0 | 0    | 0 | 0 | 0    | 0    | 0    | 0    | 0    | 0    |
| miR-373  | 0    | 0    | 0    | 0    | 0    | 0 | 0    | 0 | 0 | 0 | 0    | 0 | 0 | 0    | 0    | 0    | 0    | 0    | 0    |
| miR-374a | 0    | 0    | 0    | 0    | 0    | 0 | 0    | 0 | 0 | 0 | 0    | 0 | 0 | 0    | 0    | 0    | 0    | 0    | 0    |
| miR-374b | 0    | 0    | 0    | 0.01 | 0    | 0 | 0    | 0 | 0 | 0 | 0    | 0 | 0 | 0    | 0    | 0    | 0    | 0    | 0    |
| miR-375  | 0    | 0    | 0    | 0    | 0    | 0 | 0    | 0 | 0 | 0 | 0    | 0 | 0 | 0    | 0    | 0    | 0    | 0    | 0    |
| miR-376a | 0    | 0    | 0    | 0    | 0    | 0 | 0    | 0 | 0 | 0 | 0    | 0 | 0 | 0    | 0    | 0    | 0    | 0    | 0    |
| miR-376b | 0    | 0    | 0    | 0    | 0    | 0 | 0    | 0 | 0 | 0 | 0    | 0 | 0 | 0    | 0    | 0    | 0    | 0    | 0    |
| miR-377  | 0    | 0    | 0    | 0    | 0    | 0 | 0    | 0 | 0 | 0 | 0    | 0 | 0 | 0    | 0    | 0    | 0    | 0    | 0    |
| miR-378  | 0.01 | 0.01 | 0.01 | 0    | 0    | 0 | 0    | 0 | 0 | 0 | 0    | 0 | 0 | 0    | 0    | 0    | 0    | 0    | 0    |
| miR-379  | 0    | 0    | 0    | 0    | 0    | 0 | 0    | 0 | 0 | 0 | 0    | 0 | 0 | 0    | 0    | 0    | 0    | 0    | 0    |
| miR-380  | 0    | 0    | 0    | 0    | 0    | 0 | 0    | 0 | 0 | 0 | 0    | 0 | 0 | 0    | 0    | 0    | 0    | 0    | 0    |
| miR-381  | 0    | 0    | 0    | 0    | 0    | 0 | 0    | 0 | 0 | 0 | 0    | 0 | 0 | 0    | 0    | 0    | 0    | 0    | 0    |
| miR-382  | 0    | 0    | 0    | 0    | 0    | 0 | 0    | 0 | 0 | 0 | 0    | 0 | 0 | 0    | 0    | 0    | 0    | 0    | 0    |
| miR-383  | 0    | 0    | 0    | 0    | 0    | 0 | 0    | 0 | 0 | 0 | 0    | 0 | 0 | 0    | 0    | 0    | 0    | 0    | 0    |
| miR-384  | 0    | 0    | 0    | 0    | 0    | 0 | 0    | 0 | 0 | 0 | 0    | 0 | 0 | 0    | 0    | 0    | 0    | 0    | 0    |
| miR-384  | 0    | 0    | 0    | 0    | 0    | 0 | 0    | 0 | 0 | 0 | 0    | 0 | 0 | 0    | 0    | 0    | 0    | 0    | 0    |
| miR-409  | 0    | 0    | 0    | 0    | 0    | 0 | 0    | 0 | 0 | 0 | 0    | 0 | 0 | 0    | 0    | 0    | 0    | 0    | 0    |
| miR-409  | 0    | 0    | 0    | 0    | 0    | 0 | 0    | 0 | 0 | 0 | 0    | 0 | 0 | 0    | 0    | 0    | 0    | 0    | 0    |
| miR-410  | 0    | 0    | 0    | 0    | 0    | 0 | 0    | 0 | 0 | 0 | 0    | 0 | 0 | 0    | 0    | 0    | 0    | 0    | 0    |
| miR-411  | 0    | 0    | 0    | 0    | 0    | 0 | 0    | 0 | 0 | 0 | 0    | 0 | 0 | 0    | 0    | 0    | 0    | 0    | 0    |
| miR-412  | 0    | 0    | 0    | 0    | 0    | 0 | 0    | 0 | 0 | 0 | 0    | 0 | 0 | 0    | 0    | 0    | 0    | 0    | 0    |
| miR-421  | 0    | 0    | 0    | 0    | 0    | 0 | 0    | 0 | 0 | 0 | 0    | 0 | 0 | 0    | 0    | 0    | 0    | 0    | 0    |
| miR-422a | 0    | 0    | 0    | 0    | 0    | 0 | 0    | 0 | 0 | 0 | 0    | 0 | 0 | 0    | 0    | 0    | 0    | 0    | 0    |
| miR-423  | 0    | 0    | 0.01 | 0    | 0    | 0 | 0    | 0 | 0 | 0 | 0    | 0 | 0 | 0.01 | 0    | 0    | 0    | 0    | 0    |
| miR-423  | 0    | 0    | 0    | 0    | 0    | 0 | 0    | 0 | 0 | 0 | 0    | 0 | 0 | 0    | 0    | 0    | 0    | 0    | 0    |
| miR-424  | 0    | 0    | 0.01 | 0.01 | 0    | 0 | 0.01 | 0 | 0 | 0 | 0.02 | 0 | 0 | 0    | 0.01 | 0    | 0    | 0.03 | 0    |
| miR-425  | 0    | 0    | 0.01 | 0.02 | 0.01 | 0 | 0.01 | 0 | 0 | 0 | 0.01 | 0 | 0 | 0    | 0.02 | 0.01 | 0.01 | 0.01 | 0.01 |
| miR-429  | 0    | 0    | 0    | 0    | 0    | 0 | 0    | 0 | 0 | 0 | 0    | 0 | 0 | 0    | 0    | 0    | 0    | 0    | 0    |
| miR-431  | 0    | 0    | 0    | 0    | 0    | 0 | 0    | 0 | 0 | 0 | 0    | 0 | 0 | 0    | 0    | 0    | 0    | 0    | 0    |
| miR-432  | 0    | 0    | 0    | 0    | 0    | 0 | 0    | 0 | 0 | 0 | 0    | 0 | 0 | 0    | 0    | 0    | 0    | 0    | 0    |
| miR-433  | 0    | 0    | 0    | 0    | 0    | 0 | 0    | 0 | 0 | 0 | 0    | 0 | 0 | 0    | 0    | 0    | 0    | 0    | 0    |
| miR-448  | 0    | 0    | 0    | 0    | 0    | 0 | 0    | 0 | 0 | 0 | 0    | 0 | 0 | 0    | 0    | 0    | 0    | 0    | 0    |
| miR-449a | 0    | 0    | 0    | 0    | 0    | 0 | 0    | 0 | 0 | 0 | 0    | 0 | 0 | 0    | 0    | 0    | 0    | 0    | 0    |
| miR-449b | 0    | 0    | 0    | 0    | 0    | 0 | 0    | 0 | 0 | 0 | 0    | 0 | 0 | 0    | 0    | 0    | 0    | 0    | 0    |
| miR-450a | 0    | 0    | 0    | 0    | 0    | 0 | 0    | 0 | 0 | 0 | 0    | 0 | 0 | 0    | 0    | 0    | 0    | 0    | 0    |
| miR-450b | 0    | 0    | 0    | 0    | 0    | 0 | 0    | 0 | 0 | 0 | 0    | 0 | 0 | 0    | 0    | 0    | 0    | 0    | 0    |

Feuille1

|          |   |   |   |   |   |   |      |   |      |   |      |      |      |      |   |   |   |      |   |
|----------|---|---|---|---|---|---|------|---|------|---|------|------|------|------|---|---|---|------|---|
| miR-450b | 0 | 0 | 0 | 0 | 0 | 0 | 0    | 0 | 0    | 0 | 0    | 0    | 0    | 0    | 0 | 0 | 0 | 0    | 0 |
| miR-451  | 0 | 0 | 0 | 0 | 0 | 0 | 0.01 | 0 | 0.09 | 0 | 0.01 | 0.01 | 0.02 | 0.03 | 0 | 0 | 0 | 0.02 | 0 |
| miR-452  | 0 | 0 | 0 | 0 | 0 | 0 | 0    | 0 | 0    | 0 | 0    | 0    | 0    | 0    | 0 | 0 | 0 | 0    | 0 |
| miR-453  | 0 | 0 | 0 | 0 | 0 | 0 | 0    | 0 | 0    | 0 | 0    | 0    | 0    | 0    | 0 | 0 | 0 | 0    | 0 |
| miR-454  | 0 | 0 | 0 | 0 | 0 | 0 | 0    | 0 | 0    | 0 | 0    | 0    | 0    | 0    | 0 | 0 | 0 | 0    | 0 |
| miR-455  | 0 | 0 | 0 | 0 | 0 | 0 | 0    | 0 | 0    | 0 | 0    | 0    | 0    | 0    | 0 | 0 | 0 | 0    | 0 |
| miR-455  | 0 | 0 | 0 | 0 | 0 | 0 | 0    | 0 | 0    | 0 | 0    | 0    | 0    | 0    | 0 | 0 | 0 | 0    | 0 |
| miR-483  | 0 | 0 | 0 | 0 | 0 | 0 | 0    | 0 | 0    | 0 | 0    | 0    | 0    | 0    | 0 | 0 | 0 | 0    | 0 |
| miR-483  | 0 | 0 | 0 | 0 | 0 | 0 | 0    | 0 | 0    | 0 | 0    | 0    | 0    | 0    | 0 | 0 | 0 | 0    | 0 |
| miR-484  | 0 | 0 | 0 | 0 | 0 | 0 | 0    | 0 | 0    | 0 | 0    | 0    | 0    | 0    | 0 | 0 | 0 | 0    | 0 |
| miR-485  | 0 | 0 | 0 | 0 | 0 | 0 | 0    | 0 | 0    | 0 | 0    | 0    | 0    | 0    | 0 | 0 | 0 | 0    | 0 |
| miR-485  | 0 | 0 | 0 | 0 | 0 | 0 | 0    | 0 | 0    | 0 | 0    | 0    | 0    | 0    | 0 | 0 | 0 | 0    | 0 |
| miR-486  | 0 | 0 | 0 | 0 | 0 | 0 | 0    | 0 | 0    | 0 | 0    | 0    | 0    | 0    | 0 | 0 | 0 | 0    | 0 |
| miR-486  | 0 | 0 | 0 | 0 | 0 | 0 | 0    | 0 | 0    | 0 | 0    | 0    | 0    | 0    | 0 | 0 | 0 | 0    | 0 |
| miR-487a | 0 | 0 | 0 | 0 | 0 | 0 | 0    | 0 | 0    | 0 | 0    | 0    | 0    | 0    | 0 | 0 | 0 | 0    | 0 |
| miR-487b | 0 | 0 | 0 | 0 | 0 | 0 | 0    | 0 | 0    | 0 | 0    | 0    | 0    | 0    | 0 | 0 | 0 | 0    | 0 |
| miR-488  | 0 | 0 | 0 | 0 | 0 | 0 | 0    | 0 | 0    | 0 | 0    | 0.01 | 0.01 | 0.01 | 0 | 0 | 0 | 0    | 0 |
| miR-489  | 0 | 0 | 0 | 0 | 0 | 0 | 0    | 0 | 0    | 0 | 0    | 0    | 0    | 0    | 0 | 0 | 0 | 0    | 0 |
| miR-490  | 0 | 0 | 0 | 0 | 0 | 0 | 0    | 0 | 0    | 0 | 0    | 0    | 0    | 0    | 0 | 0 | 0 | 0    | 0 |
| miR-491  | 0 | 0 | 0 | 0 | 0 | 0 | 0    | 0 | 0    | 0 | 0    | 0    | 0    | 0    | 0 | 0 | 0 | 0    | 0 |
| miR-491  | 0 | 0 | 0 | 0 | 0 | 0 | 0    | 0 | 0    | 0 | 0    | 0    | 0    | 0    | 0 | 0 | 0 | 0    | 0 |
| miR-492  | 0 | 0 | 0 | 0 | 0 | 0 | 0    | 0 | 0    | 0 | 0    | 0    | 0    | 0    | 0 | 0 | 0 | 0    | 0 |
| miR-493  | 0 | 0 | 0 | 0 | 0 | 0 | 0    | 0 | 0    | 0 | 0    | 0    | 0    | 0    | 0 | 0 | 0 | 0    | 0 |
| miR-494  | 0 | 0 | 0 | 0 | 0 | 0 | 0    | 0 | 0    | 0 | 0    | 0    | 0    | 0    | 0 | 0 | 0 | 0    | 0 |
| miR-495  | 0 | 0 | 0 | 0 | 0 | 0 | 0    | 0 | 0    | 0 | 0    | 0    | 0    | 0    | 0 | 0 | 0 | 0    | 0 |
| miR-496  | 0 | 0 | 0 | 0 | 0 | 0 | 0    | 0 | 0    | 0 | 0    | 0    | 0    | 0    | 0 | 0 | 0 | 0    | 0 |
| miR-497  | 0 | 0 | 0 | 0 | 0 | 0 | 0    | 0 | 0    | 0 | 0    | 0    | 0    | 0    | 0 | 0 | 0 | 0    | 0 |
| miR-498  | 0 | 0 | 0 | 0 | 0 | 0 | 0    | 0 | 0    | 0 | 0    | 0    | 0    | 0    | 0 | 0 | 0 | 0    | 0 |
| miR-499  | 0 | 0 | 0 | 0 | 0 | 0 | 0    | 0 | 0    | 0 | 0    | 0    | 0    | 0    | 0 | 0 | 0 | 0    | 0 |
| miR-499  | 0 | 0 | 0 | 0 | 0 | 0 | 0    | 0 | 0    | 0 | 0    | 0    | 0    | 0    | 0 | 0 | 0 | 0    | 0 |
| miR-500  | 0 | 0 | 0 | 0 | 0 | 0 | 0    | 0 | 0    | 0 | 0    | 0    | 0    | 0    | 0 | 0 | 0 | 0    | 0 |
| miR-501  | 0 | 0 | 0 | 0 | 0 | 0 | 0    | 0 | 0    | 0 | 0    | 0    | 0    | 0    | 0 | 0 | 0 | 0    | 0 |
| miR-501  | 0 | 0 | 0 | 0 | 0 | 0 | 0    | 0 | 0    | 0 | 0    | 0    | 0    | 0    | 0 | 0 | 0 | 0    | 0 |
| miR-502  | 0 | 0 | 0 | 0 | 0 | 0 | 0    | 0 | 0    | 0 | 0    | 0    | 0    | 0    | 0 | 0 | 0 | 0    | 0 |
| miR-503  | 0 | 0 | 0 | 0 | 0 | 0 | 0    | 0 | 0    | 0 | 0    | 0    | 0    | 0    | 0 | 0 | 0 | 0    | 0 |
| miR-504  | 0 | 0 | 0 | 0 | 0 | 0 | 0    | 0 | 0    | 0 | 0    | 0    | 0    | 0    | 0 | 0 | 0 | 0    | 0 |



Feuille1

|          |   |   |   |   |   |   |      |   |   |   |   |   |   |   |   |   |   |   |   |   |
|----------|---|---|---|---|---|---|------|---|---|---|---|---|---|---|---|---|---|---|---|---|
| miR-505  | 0 | 0 | 0 | 0 | 0 | 0 | 0.01 | 0 | 0 | 0 | 0 | 0 | 0 | 0 | 0 | 0 | 0 | 0 | 0 | 0 |
| miR-506  | 0 | 0 | 0 | 0 | 0 | 0 | 0    | 0 | 0 | 0 | 0 | 0 | 0 | 0 | 0 | 0 | 0 | 0 | 0 | 0 |
| miR-507  | 0 | 0 | 0 | 0 | 0 | 0 | 0    | 0 | 0 | 0 | 0 | 0 | 0 | 0 | 0 | 0 | 0 | 0 | 0 | 0 |
| miR-508  | 0 | 0 | 0 | 0 | 0 | 0 | 0    | 0 | 0 | 0 | 0 | 0 | 0 | 0 | 0 | 0 | 0 | 0 | 0 | 0 |
| miR-508  | 0 | 0 | 0 | 0 | 0 | 0 | 0    | 0 | 0 | 0 | 0 | 0 | 0 | 0 | 0 | 0 | 0 | 0 | 0 | 0 |
| miR-509  | 0 | 0 | 0 | 0 | 0 | 0 | 0    | 0 | 0 | 0 | 0 | 0 | 0 | 0 | 0 | 0 | 0 | 0 | 0 | 0 |
| miR-509  | 0 | 0 | 0 | 0 | 0 | 0 | 0    | 0 | 0 | 0 | 0 | 0 | 0 | 0 | 0 | 0 | 0 | 0 | 0 | 0 |
| miR-510  | 0 | 0 | 0 | 0 | 0 | 0 | 0    | 0 | 0 | 0 | 0 | 0 | 0 | 0 | 0 | 0 | 0 | 0 | 0 | 0 |
| miR-511  | 0 | 0 | 0 | 0 | 0 | 0 | 0    | 0 | 0 | 0 | 0 | 0 | 0 | 0 | 0 | 0 | 0 | 0 | 0 | 0 |
| miR-512  | 0 | 0 | 0 | 0 | 0 | 0 | 0    | 0 | 0 | 0 | 0 | 0 | 0 | 0 | 0 | 0 | 0 | 0 | 0 | 0 |
| miR-513  | 0 | 0 | 0 | 0 | 0 | 0 | 0    | 0 | 0 | 0 | 0 | 0 | 0 | 0 | 0 | 0 | 0 | 0 | 0 | 0 |
| miR-513  | 0 | 0 | 0 | 0 | 0 | 0 | 0    | 0 | 0 | 0 | 0 | 0 | 0 | 0 | 0 | 0 | 0 | 0 | 0 | 0 |
| miR-514  | 0 | 0 | 0 | 0 | 0 | 0 | 0    | 0 | 0 | 0 | 0 | 0 | 0 | 0 | 0 | 0 | 0 | 0 | 0 | 0 |
| miR-515  | 0 | 0 | 0 | 0 | 0 | 0 | 0    | 0 | 0 | 0 | 0 | 0 | 0 | 0 | 0 | 0 | 0 | 0 | 0 | 0 |
| miR-515  | 0 | 0 | 0 | 0 | 0 | 0 | 0    | 0 | 0 | 0 | 0 | 0 | 0 | 0 | 0 | 0 | 0 | 0 | 0 | 0 |
| miR-516a | 0 | 0 | 0 | 0 | 0 | 0 | 0    | 0 | 0 | 0 | 0 | 0 | 0 | 0 | 0 | 0 | 0 | 0 | 0 | 0 |
| miR-516b | 0 | 0 | 0 | 0 | 0 | 0 | 0    | 0 | 0 | 0 | 0 | 0 | 0 | 0 | 0 | 0 | 0 | 0 | 0 | 0 |
| miR-517a | 0 | 0 | 0 | 0 | 0 | 0 | 0    | 0 | 0 | 0 | 0 | 0 | 0 | 0 | 0 | 0 | 0 | 0 | 0 | 0 |
| miR-517c | 0 | 0 | 0 | 0 | 0 | 0 | 0    | 0 | 0 | 0 | 0 | 0 | 0 | 0 | 0 | 0 | 0 | 0 | 0 | 0 |
| miR-518a | 0 | 0 | 0 | 0 | 0 | 0 | 0    | 0 | 0 | 0 | 0 | 0 | 0 | 0 | 0 | 0 | 0 | 0 | 0 | 0 |
| miR-518a | 0 | 0 | 0 | 0 | 0 | 0 | 0    | 0 | 0 | 0 | 0 | 0 | 0 | 0 | 0 | 0 | 0 | 0 | 0 | 0 |
| miR-518b | 0 | 0 | 0 | 0 | 0 | 0 | 0    | 0 | 0 | 0 | 0 | 0 | 0 | 0 | 0 | 0 | 0 | 0 | 0 | 0 |
| miR-518c | 0 | 0 | 0 | 0 | 0 | 0 | 0    | 0 | 0 | 0 | 0 | 0 | 0 | 0 | 0 | 0 | 0 | 0 | 0 | 0 |
| miR-518d | 0 | 0 | 0 | 0 | 0 | 0 | 0    | 0 | 0 | 0 | 0 | 0 | 0 | 0 | 0 | 0 | 0 | 0 | 0 | 0 |
| miR-518e | 0 | 0 | 0 | 0 | 0 | 0 | 0    | 0 | 0 | 0 | 0 | 0 | 0 | 0 | 0 | 0 | 0 | 0 | 0 | 0 |
| miR-518f | 0 | 0 | 0 | 0 | 0 | 0 | 0    | 0 | 0 | 0 | 0 | 0 | 0 | 0 | 0 | 0 | 0 | 0 | 0 | 0 |
| miR-519a | 0 | 0 | 0 | 0 | 0 | 0 | 0    | 0 | 0 | 0 | 0 | 0 | 0 | 0 | 0 | 0 | 0 | 0 | 0 | 0 |
| miR-519b | 0 | 0 | 0 | 0 | 0 | 0 | 0    | 0 | 0 | 0 | 0 | 0 | 0 | 0 | 0 | 0 | 0 | 0 | 0 | 0 |
| miR-519b | 0 | 0 | 0 | 0 | 0 | 0 | 0    | 0 | 0 | 0 | 0 | 0 | 0 | 0 | 0 | 0 | 0 | 0 | 0 | 0 |
| miR-519c | 0 | 0 | 0 | 0 | 0 | 0 | 0    | 0 | 0 | 0 | 0 | 0 | 0 | 0 | 0 | 0 | 0 | 0 | 0 | 0 |
| miR-519d | 0 | 0 | 0 | 0 | 0 | 0 | 0    | 0 | 0 | 0 | 0 | 0 | 0 | 0 | 0 | 0 | 0 | 0 | 0 | 0 |
| miR-519e | 0 | 0 | 0 | 0 | 0 | 0 | 0    | 0 | 0 | 0 | 0 | 0 | 0 | 0 | 0 | 0 | 0 | 0 | 0 | 0 |
| miR-520a | 0 | 0 | 0 | 0 | 0 | 0 | 0    | 0 | 0 | 0 | 0 | 0 | 0 | 0 | 0 | 0 | 0 | 0 | 0 | 0 |
| miR-520c | 0 | 0 | 0 | 0 | 0 | 0 | 0    | 0 | 0 | 0 | 0 | 0 | 0 | 0 | 0 | 0 | 0 | 0 | 0 | 0 |
| miR-520c | 0 | 0 | 0 | 0 | 0 | 0 | 0    | 0 | 0 | 0 | 0 | 0 | 0 | 0 | 0 | 0 | 0 | 0 | 0 | 0 |
| miR-520c | 0 | 0 | 0 | 0 | 0 | 0 | 0    | 0 | 0 | 0 | 0 | 0 | 0 | 0 | 0 | 0 | 0 | 0 | 0 | 0 |

Feuille1

|          |   |   |   |   |   |   |   |   |   |   |   |   |   |   |   |   |   |   |   |
|----------|---|---|---|---|---|---|---|---|---|---|---|---|---|---|---|---|---|---|---|
| miR-520d | 0 | 0 | 0 | 0 | 0 | 0 | 0 | 0 | 0 | 0 | 0 | 0 | 0 | 0 | 0 | 0 | 0 | 0 | 0 |
| miR-520d | 0 | 0 | 0 | 0 | 0 | 0 | 0 | 0 | 0 | 0 | 0 | 0 | 0 | 0 | 0 | 0 | 0 | 0 | 0 |
| miR-520e | 0 | 0 | 0 | 0 | 0 | 0 | 0 | 0 | 0 | 0 | 0 | 0 | 0 | 0 | 0 | 0 | 0 | 0 | 0 |
| miR-520f | 0 | 0 | 0 | 0 | 0 | 0 | 0 | 0 | 0 | 0 | 0 | 0 | 0 | 0 | 0 | 0 | 0 | 0 | 0 |
| miR-520g | 0 | 0 | 0 | 0 | 0 | 0 | 0 | 0 | 0 | 0 | 0 | 0 | 0 | 0 | 0 | 0 | 0 | 0 | 0 |
| miR-520h | 0 | 0 | 0 | 0 | 0 | 0 | 0 | 0 | 0 | 0 | 0 | 0 | 0 | 0 | 0 | 0 | 0 | 0 | 0 |
| miR-521  | 0 | 0 | 0 | 0 | 0 | 0 | 0 | 0 | 0 | 0 | 0 | 0 | 0 | 0 | 0 | 0 | 0 | 0 | 0 |
| miR-522  | 0 | 0 | 0 | 0 | 0 | 0 | 0 | 0 | 0 | 0 | 0 | 0 | 0 | 0 | 0 | 0 | 0 | 0 | 0 |
| miR-523  | 0 | 0 | 0 | 0 | 0 | 0 | 0 | 0 | 0 | 0 | 0 | 0 | 0 | 0 | 0 | 0 | 0 | 0 | 0 |
| miR-524  | 0 | 0 | 0 | 0 | 0 | 0 | 0 | 0 | 0 | 0 | 0 | 0 | 0 | 0 | 0 | 0 | 0 | 0 | 0 |
| miR-525  | 0 | 0 | 0 | 0 | 0 | 0 | 0 | 0 | 0 | 0 | 0 | 0 | 0 | 0 | 0 | 0 | 0 | 0 | 0 |
| miR-525  | 0 | 0 | 0 | 0 | 0 | 0 | 0 | 0 | 0 | 0 | 0 | 0 | 0 | 0 | 0 | 0 | 0 | 0 | 0 |
| miR-526a | 0 | 0 | 0 | 0 | 0 | 0 | 0 | 0 | 0 | 0 | 0 | 0 | 0 | 0 | 0 | 0 | 0 | 0 | 0 |
| miR-526b | 0 | 0 | 0 | 0 | 0 | 0 | 0 | 0 | 0 | 0 | 0 | 0 | 0 | 0 | 0 | 0 | 0 | 0 | 0 |
| miR-527  | 0 | 0 | 0 | 0 | 0 | 0 | 0 | 0 | 0 | 0 | 0 | 0 | 0 | 0 | 0 | 0 | 0 | 0 | 0 |
| miR-532  | 0 | 0 | 0 | 0 | 0 | 0 | 0 | 0 | 0 | 0 | 0 | 0 | 0 | 0 | 0 | 0 | 0 | 0 | 0 |
| miR-532  | 0 | 0 | 0 | 0 | 0 | 0 | 0 | 0 | 0 | 0 | 0 | 0 | 0 | 0 | 0 | 0 | 0 | 0 | 0 |
| miR-539  | 0 | 0 | 0 | 0 | 0 | 0 | 0 | 0 | 0 | 0 | 0 | 0 | 0 | 0 | 0 | 0 | 0 | 0 | 0 |
| miR-541  | 0 | 0 | 0 | 0 | 0 | 0 | 0 | 0 | 0 | 0 | 0 | 0 | 0 | 0 | 0 | 0 | 0 | 0 | 0 |
| miR-542  | 0 | 0 | 0 | 0 | 0 | 0 | 0 | 0 | 0 | 0 | 0 | 0 | 0 | 0 | 0 | 0 | 0 | 0 | 0 |
| miR-542  | 0 | 0 | 0 | 0 | 0 | 0 | 0 | 0 | 0 | 0 | 0 | 0 | 0 | 0 | 0 | 0 | 0 | 0 | 0 |
| miR-543  | 0 | 0 | 0 | 0 | 0 | 0 | 0 | 0 | 0 | 0 | 0 | 0 | 0 | 0 | 0 | 0 | 0 | 0 | 0 |
| miR-544  | 0 | 0 | 0 | 0 | 0 | 0 | 0 | 0 | 0 | 0 | 0 | 0 | 0 | 0 | 0 | 0 | 0 | 0 | 0 |
| miR-545  | 0 | 0 | 0 | 0 | 0 | 0 | 0 | 0 | 0 | 0 | 0 | 0 | 0 | 0 | 0 | 0 | 0 | 0 | 0 |
| miR-548a | 0 | 0 | 0 | 0 | 0 | 0 | 0 | 0 | 0 | 0 | 0 | 0 | 0 | 0 | 0 | 0 | 0 | 0 | 0 |
| miR-548a | 0 | 0 | 0 | 0 | 0 | 0 | 0 | 0 | 0 | 0 | 0 | 0 | 0 | 0 | 0 | 0 | 0 | 0 | 0 |
| miR-548a | 0 | 0 | 0 | 0 | 0 | 0 | 0 | 0 | 0 | 0 | 0 | 0 | 0 | 0 | 0 | 0 | 0 | 0 | 0 |
| miR-548b | 0 | 0 | 0 | 0 | 0 | 0 | 0 | 0 | 0 | 0 | 0 | 0 | 0 | 0 | 0 | 0 | 0 | 0 | 0 |
| miR-548b | 0 | 0 | 0 | 0 | 0 | 0 | 0 | 0 | 0 | 0 | 0 | 0 | 0 | 0 | 0 | 0 | 0 | 0 | 0 |
| miR-548c | 0 | 0 | 0 | 0 | 0 | 0 | 0 | 0 | 0 | 0 | 0 | 0 | 0 | 0 | 0 | 0 | 0 | 0 | 0 |
| miR-548d | 0 | 0 | 0 | 0 | 0 | 0 | 0 | 0 | 0 | 0 | 0 | 0 | 0 | 0 | 0 | 0 | 0 | 0 | 0 |
| miR-548d | 0 | 0 | 0 | 0 | 0 | 0 | 0 | 0 | 0 | 0 | 0 | 0 | 0 | 0 | 0 | 0 | 0 | 0 | 0 |
| miR-549  | 0 | 0 | 0 | 0 | 0 | 0 | 0 | 0 | 0 | 0 | 0 | 0 | 0 | 0 | 0 | 0 | 0 | 0 | 0 |
| miR-550  | 0 | 0 | 0 | 0 | 0 | 0 | 0 | 0 | 0 | 0 | 0 | 0 | 0 | 0 | 0 | 0 | 0 | 0 | 0 |
| miR-551a | 0 | 0 | 0 | 0 | 0 | 0 | 0 | 0 | 0 | 0 | 0 | 0 | 0 | 0 | 0 | 0 | 0 | 0 | 0 |
| miR-551b | 0 | 0 | 0 | 0 | 0 | 0 | 0 | 0 | 0 | 0 | 0 | 0 | 0 | 0 | 0 | 0 | 0 | 0 | 0 |



Feuille1

|         |   |   |   |   |   |   |   |   |   |   |   |   |   |   |      |   |   |   |   |
|---------|---|---|---|---|---|---|---|---|---|---|---|---|---|---|------|---|---|---|---|
| miR-586 | 0 | 0 | 0 | 0 | 0 | 0 | 0 | 0 | 0 | 0 | 0 | 0 | 0 | 0 | 0    | 0 | 0 | 0 | 0 |
| miR-587 | 0 | 0 | 0 | 0 | 0 | 0 | 0 | 0 | 0 | 0 | 0 | 0 | 0 | 0 | 0    | 0 | 0 | 0 | 0 |
| miR-588 | 0 | 0 | 0 | 0 | 0 | 0 | 0 | 0 | 0 | 0 | 0 | 0 | 0 | 0 | 0    | 0 | 0 | 0 | 0 |
| miR-589 | 0 | 0 | 0 | 0 | 0 | 0 | 0 | 0 | 0 | 0 | 0 | 0 | 0 | 0 | 0    | 0 | 0 | 0 | 0 |
| miR-590 | 0 | 0 | 0 | 0 | 0 | 0 | 0 | 0 | 0 | 0 | 0 | 0 | 0 | 0 | 0.01 | 0 | 0 | 0 | 0 |
| miR-590 | 0 | 0 | 0 | 0 | 0 | 0 | 0 | 0 | 0 | 0 | 0 | 0 | 0 | 0 | 0    | 0 | 0 | 0 | 0 |
| miR-591 | 0 | 0 | 0 | 0 | 0 | 0 | 0 | 0 | 0 | 0 | 0 | 0 | 0 | 0 | 0    | 0 | 0 | 0 | 0 |
| miR-592 | 0 | 0 | 0 | 0 | 0 | 0 | 0 | 0 | 0 | 0 | 0 | 0 | 0 | 0 | 0    | 0 | 0 | 0 | 0 |
| miR-593 | 0 | 0 | 0 | 0 | 0 | 0 | 0 | 0 | 0 | 0 | 0 | 0 | 0 | 0 | 0    | 0 | 0 | 0 | 0 |
| miR-595 | 0 | 0 | 0 | 0 | 0 | 0 | 0 | 0 | 0 | 0 | 0 | 0 | 0 | 0 | 0    | 0 | 0 | 0 | 0 |
| miR-596 | 0 | 0 | 0 | 0 | 0 | 0 | 0 | 0 | 0 | 0 | 0 | 0 | 0 | 0 | 0    | 0 | 0 | 0 | 0 |
| miR-597 | 0 | 0 | 0 | 0 | 0 | 0 | 0 | 0 | 0 | 0 | 0 | 0 | 0 | 0 | 0    | 0 | 0 | 0 | 0 |
| miR-598 | 0 | 0 | 0 | 0 | 0 | 0 | 0 | 0 | 0 | 0 | 0 | 0 | 0 | 0 | 0    | 0 | 0 | 0 | 0 |
| miR-600 | 0 | 0 | 0 | 0 | 0 | 0 | 0 | 0 | 0 | 0 | 0 | 0 | 0 | 0 | 0    | 0 | 0 | 0 | 0 |
| miR-601 | 0 | 0 | 0 | 0 | 0 | 0 | 0 | 0 | 0 | 0 | 0 | 0 | 0 | 0 | 0    | 0 | 0 | 0 | 0 |
| miR-602 | 0 | 0 | 0 | 0 | 0 | 0 | 0 | 0 | 0 | 0 | 0 | 0 | 0 | 0 | 0    | 0 | 0 | 0 | 0 |
| miR-603 | 0 | 0 | 0 | 0 | 0 | 0 | 0 | 0 | 0 | 0 | 0 | 0 | 0 | 0 | 0    | 0 | 0 | 0 | 0 |
| miR-604 | 0 | 0 | 0 | 0 | 0 | 0 | 0 | 0 | 0 | 0 | 0 | 0 | 0 | 0 | 0    | 0 | 0 | 0 | 0 |
| miR-605 | 0 | 0 | 0 | 0 | 0 | 0 | 0 | 0 | 0 | 0 | 0 | 0 | 0 | 0 | 0    | 0 | 0 | 0 | 0 |
| miR-606 | 0 | 0 | 0 | 0 | 0 | 0 | 0 | 0 | 0 | 0 | 0 | 0 | 0 | 0 | 0    | 0 | 0 | 0 | 0 |
| miR-607 | 0 | 0 | 0 | 0 | 0 | 0 | 0 | 0 | 0 | 0 | 0 | 0 | 0 | 0 | 0    | 0 | 0 | 0 | 0 |
| miR-608 | 0 | 0 | 0 | 0 | 0 | 0 | 0 | 0 | 0 | 0 | 0 | 0 | 0 | 0 | 0    | 0 | 0 | 0 | 0 |
| miR-609 | 0 | 0 | 0 | 0 | 0 | 0 | 0 | 0 | 0 | 0 | 0 | 0 | 0 | 0 | 0    | 0 | 0 | 0 | 0 |
| miR-610 | 0 | 0 | 0 | 0 | 0 | 0 | 0 | 0 | 0 | 0 | 0 | 0 | 0 | 0 | 0    | 0 | 0 | 0 | 0 |
| miR-611 | 0 | 0 | 0 | 0 | 0 | 0 | 0 | 0 | 0 | 0 | 0 | 0 | 0 | 0 | 0    | 0 | 0 | 0 | 0 |
| miR-612 | 0 | 0 | 0 | 0 | 0 | 0 | 0 | 0 | 0 | 0 | 0 | 0 | 0 | 0 | 0    | 0 | 0 | 0 | 0 |
| miR-613 | 0 | 0 | 0 | 0 | 0 | 0 | 0 | 0 | 0 | 0 | 0 | 0 | 0 | 0 | 0    | 0 | 0 | 0 | 0 |
| miR-614 | 0 | 0 | 0 | 0 | 0 | 0 | 0 | 0 | 0 | 0 | 0 | 0 | 0 | 0 | 0    | 0 | 0 | 0 | 0 |
| miR-615 | 0 | 0 | 0 | 0 | 0 | 0 | 0 | 0 | 0 | 0 | 0 | 0 | 0 | 0 | 0    | 0 | 0 | 0 | 0 |
| miR-615 | 0 | 0 | 0 | 0 | 0 | 0 | 0 | 0 | 0 | 0 | 0 | 0 | 0 | 0 | 0    | 0 | 0 | 0 | 0 |
| miR-616 | 0 | 0 | 0 | 0 | 0 | 0 | 0 | 0 | 0 | 0 | 0 | 0 | 0 | 0 | 0    | 0 | 0 | 0 | 0 |
| miR-617 | 0 | 0 | 0 | 0 | 0 | 0 | 0 | 0 | 0 | 0 | 0 | 0 | 0 | 0 | 0    | 0 | 0 | 0 | 0 |
| miR-618 | 0 | 0 | 0 | 0 | 0 | 0 | 0 | 0 | 0 | 0 | 0 | 0 | 0 | 0 | 0    | 0 | 0 | 0 | 0 |
| miR-619 | 0 | 0 | 0 | 0 | 0 | 0 | 0 | 0 | 0 | 0 | 0 | 0 | 0 | 0 | 0    | 0 | 0 | 0 | 0 |
| miR-620 | 0 | 0 | 0 | 0 | 0 | 0 | 0 | 0 | 0 | 0 | 0 | 0 | 0 | 0 | 0    | 0 | 0 | 0 | 0 |
| miR-621 | 0 | 0 | 0 | 0 | 0 | 0 | 0 | 0 | 0 | 0 | 0 | 0 | 0 | 0 | 0    | 0 | 0 | 0 | 0 |

Feuille1

|         |   |   |   |   |   |   |   |   |   |   |   |   |   |   |   |   |   |   |   |
|---------|---|---|---|---|---|---|---|---|---|---|---|---|---|---|---|---|---|---|---|
| miR-622 | 0 | 0 | 0 | 0 | 0 | 0 | 0 | 0 | 0 | 0 | 0 | 0 | 0 | 0 | 0 | 0 | 0 | 0 | 0 |
| miR-623 | 0 | 0 | 0 | 0 | 0 | 0 | 0 | 0 | 0 | 0 | 0 | 0 | 0 | 0 | 0 | 0 | 0 | 0 | 0 |
| miR-624 | 0 | 0 | 0 | 0 | 0 | 0 | 0 | 0 | 0 | 0 | 0 | 0 | 0 | 0 | 0 | 0 | 0 | 0 | 0 |
| miR-625 | 0 | 0 | 0 | 0 | 0 | 0 | 0 | 0 | 0 | 0 | 0 | 0 | 0 | 0 | 0 | 0 | 0 | 0 | 0 |
| miR-626 | 0 | 0 | 0 | 0 | 0 | 0 | 0 | 0 | 0 | 0 | 0 | 0 | 0 | 0 | 0 | 0 | 0 | 0 | 0 |
| miR-627 | 0 | 0 | 0 | 0 | 0 | 0 | 0 | 0 | 0 | 0 | 0 | 0 | 0 | 0 | 0 | 0 | 0 | 0 | 0 |
| miR-628 | 0 | 0 | 0 | 0 | 0 | 0 | 0 | 0 | 0 | 0 | 0 | 0 | 0 | 0 | 0 | 0 | 0 | 0 | 0 |
| miR-628 | 0 | 0 | 0 | 0 | 0 | 0 | 0 | 0 | 0 | 0 | 0 | 0 | 0 | 0 | 0 | 0 | 0 | 0 | 0 |
| miR-629 | 0 | 0 | 0 | 0 | 0 | 0 | 0 | 0 | 0 | 0 | 0 | 0 | 0 | 0 | 0 | 0 | 0 | 0 | 0 |
| miR-630 | 0 | 0 | 0 | 0 | 0 | 0 | 0 | 0 | 0 | 0 | 0 | 0 | 0 | 0 | 0 | 0 | 0 | 0 | 0 |
| miR-631 | 0 | 0 | 0 | 0 | 0 | 0 | 0 | 0 | 0 | 0 | 0 | 0 | 0 | 0 | 0 | 0 | 0 | 0 | 0 |
| miR-632 | 0 | 0 | 0 | 0 | 0 | 0 | 0 | 0 | 0 | 0 | 0 | 0 | 0 | 0 | 0 | 0 | 0 | 0 | 0 |
| miR-633 | 0 | 0 | 0 | 0 | 0 | 0 | 0 | 0 | 0 | 0 | 0 | 0 | 0 | 0 | 0 | 0 | 0 | 0 | 0 |
| miR-634 | 0 | 0 | 0 | 0 | 0 | 0 | 0 | 0 | 0 | 0 | 0 | 0 | 0 | 0 | 0 | 0 | 0 | 0 | 0 |
| miR-635 | 0 | 0 | 0 | 0 | 0 | 0 | 0 | 0 | 0 | 0 | 0 | 0 | 0 | 0 | 0 | 0 | 0 | 0 | 0 |
| miR-636 | 0 | 0 | 0 | 0 | 0 | 0 | 0 | 0 | 0 | 0 | 0 | 0 | 0 | 0 | 0 | 0 | 0 | 0 | 0 |
| miR-637 | 0 | 0 | 0 | 0 | 0 | 0 | 0 | 0 | 0 | 0 | 0 | 0 | 0 | 0 | 0 | 0 | 0 | 0 | 0 |
| miR-638 | 0 | 0 | 0 | 0 | 0 | 0 | 0 | 0 | 0 | 0 | 0 | 0 | 0 | 0 | 0 | 0 | 0 | 0 | 0 |
| miR-639 | 0 | 0 | 0 | 0 | 0 | 0 | 0 | 0 | 0 | 0 | 0 | 0 | 0 | 0 | 0 | 0 | 0 | 0 | 0 |
| miR-640 | 0 | 0 | 0 | 0 | 0 | 0 | 0 | 0 | 0 | 0 | 0 | 0 | 0 | 0 | 0 | 0 | 0 | 0 | 0 |
| miR-641 | 0 | 0 | 0 | 0 | 0 | 0 | 0 | 0 | 0 | 0 | 0 | 0 | 0 | 0 | 0 | 0 | 0 | 0 | 0 |
| miR-642 | 0 | 0 | 0 | 0 | 0 | 0 | 0 | 0 | 0 | 0 | 0 | 0 | 0 | 0 | 0 | 0 | 0 | 0 | 0 |
| miR-643 | 0 | 0 | 0 | 0 | 0 | 0 | 0 | 0 | 0 | 0 | 0 | 0 | 0 | 0 | 0 | 0 | 0 | 0 | 0 |
| miR-644 | 0 | 0 | 0 | 0 | 0 | 0 | 0 | 0 | 0 | 0 | 0 | 0 | 0 | 0 | 0 | 0 | 0 | 0 | 0 |
| miR-645 | 0 | 0 | 0 | 0 | 0 | 0 | 0 | 0 | 0 | 0 | 0 | 0 | 0 | 0 | 0 | 0 | 0 | 0 | 0 |
| miR-646 | 0 | 0 | 0 | 0 | 0 | 0 | 0 | 0 | 0 | 0 | 0 | 0 | 0 | 0 | 0 | 0 | 0 | 0 | 0 |
| miR-647 | 0 | 0 | 0 | 0 | 0 | 0 | 0 | 0 | 0 | 0 | 0 | 0 | 0 | 0 | 0 | 0 | 0 | 0 | 0 |
| miR-648 | 0 | 0 | 0 | 0 | 0 | 0 | 0 | 0 | 0 | 0 | 0 | 0 | 0 | 0 | 0 | 0 | 0 | 0 | 0 |
| miR-649 | 0 | 0 | 0 | 0 | 0 | 0 | 0 | 0 | 0 | 0 | 0 | 0 | 0 | 0 | 0 | 0 | 0 | 0 | 0 |
| miR-650 | 0 | 0 | 0 | 0 | 0 | 0 | 0 | 0 | 0 | 0 | 0 | 0 | 0 | 0 | 0 | 0 | 0 | 0 | 0 |
| miR-651 | 0 | 0 | 0 | 0 | 0 | 0 | 0 | 0 | 0 | 0 | 0 | 0 | 0 | 0 | 0 | 0 | 0 | 0 | 0 |
| miR-652 | 0 | 0 | 0 | 0 | 0 | 0 | 0 | 0 | 0 | 0 | 0 | 0 | 0 | 0 | 0 | 0 | 0 | 0 | 0 |
| miR-653 | 0 | 0 | 0 | 0 | 0 | 0 | 0 | 0 | 0 | 0 | 0 | 0 | 0 | 0 | 0 | 0 | 0 | 0 | 0 |
| miR-654 | 0 | 0 | 0 | 0 | 0 | 0 | 0 | 0 | 0 | 0 | 0 | 0 | 0 | 0 | 0 | 0 | 0 | 0 | 0 |
| miR-654 | 0 | 0 | 0 | 0 | 0 | 0 | 0 | 0 | 0 | 0 | 0 | 0 | 0 | 0 | 0 | 0 | 0 | 0 | 0 |
| miR-655 | 0 | 0 | 0 | 0 | 0 | 0 | 0 | 0 | 0 | 0 | 0 | 0 | 0 | 0 | 0 | 0 | 0 | 0 | 0 |

Feuille1

|         |   |   |   |   |   |   |   |   |   |   |   |   |      |      |   |   |   |   |   |
|---------|---|---|---|---|---|---|---|---|---|---|---|---|------|------|---|---|---|---|---|
| miR-656 | 0 | 0 | 0 | 0 | 0 | 0 | 0 | 0 | 0 | 0 | 0 | 0 | 0    | 0    | 0 | 0 | 0 | 0 | 0 |
| miR-657 | 0 | 0 | 0 | 0 | 0 | 0 | 0 | 0 | 0 | 0 | 0 | 0 | 0    | 0    | 0 | 0 | 0 | 0 | 0 |
| miR-658 | 0 | 0 | 0 | 0 | 0 | 0 | 0 | 0 | 0 | 0 | 0 | 0 | 0    | 0    | 0 | 0 | 0 | 0 | 0 |
| miR-659 | 0 | 0 | 0 | 0 | 0 | 0 | 0 | 0 | 0 | 0 | 0 | 0 | 0    | 0    | 0 | 0 | 0 | 0 | 0 |
| miR-660 | 0 | 0 | 0 | 0 | 0 | 0 | 0 | 0 | 0 | 0 | 0 | 0 | 0    | 0    | 0 | 0 | 0 | 0 | 0 |
| miR-661 | 0 | 0 | 0 | 0 | 0 | 0 | 0 | 0 | 0 | 0 | 0 | 0 | 0    | 0    | 0 | 0 | 0 | 0 | 0 |
| miR-662 | 0 | 0 | 0 | 0 | 0 | 0 | 0 | 0 | 0 | 0 | 0 | 0 | 0    | 0    | 0 | 0 | 0 | 0 | 0 |
| miR-665 | 0 | 0 | 0 | 0 | 0 | 0 | 0 | 0 | 0 | 0 | 0 | 0 | 0    | 0    | 0 | 0 | 0 | 0 | 0 |
| miR-671 | 0 | 0 | 0 | 0 | 0 | 0 | 0 | 0 | 0 | 0 | 0 | 0 | 0    | 0    | 0 | 0 | 0 | 0 | 0 |
| miR-671 | 0 | 0 | 0 | 0 | 0 | 0 | 0 | 0 | 0 | 0 | 0 | 0 | 0    | 0    | 0 | 0 | 0 | 0 | 0 |
| miR-672 | 0 | 0 | 0 | 0 | 0 | 0 | 0 | 0 | 0 | 0 | 0 | 0 | 0    | 0    | 0 | 0 | 0 | 0 | 0 |
| miR-674 | 0 | 0 | 0 | 0 | 0 | 0 | 0 | 0 | 0 | 0 | 0 | 0 | 0    | 0    | 0 | 0 | 0 | 0 | 0 |
| miR-674 | 0 | 0 | 0 | 0 | 0 | 0 | 0 | 0 | 0 | 0 | 0 | 0 | 0    | 0    | 0 | 0 | 0 | 0 | 0 |
| miR-7   | 0 | 0 | 0 | 0 | 0 | 0 | 0 | 0 | 0 | 0 | 0 | 0 | 0    | 0    | 0 | 0 | 0 | 0 | 0 |
| miR-708 | 0 | 0 | 0 | 0 | 0 | 0 | 0 | 0 | 0 | 0 | 0 | 0 | 0.01 | 0    | 0 | 0 | 0 | 0 | 0 |
| miR-744 | 0 | 0 | 0 | 0 | 0 | 0 | 0 | 0 | 0 | 0 | 0 | 0 | 0    | 0.01 | 0 | 0 | 0 | 0 | 0 |
| miR-758 | 0 | 0 | 0 | 0 | 0 | 0 | 0 | 0 | 0 | 0 | 0 | 0 | 0    | 0    | 0 | 0 | 0 | 0 | 0 |
| miR-760 | 0 | 0 | 0 | 0 | 0 | 0 | 0 | 0 | 0 | 0 | 0 | 0 | 0    | 0    | 0 | 0 | 0 | 0 | 0 |
| miR-770 | 0 | 0 | 0 | 0 | 0 | 0 | 0 | 0 | 0 | 0 | 0 | 0 | 0    | 0    | 0 | 0 | 0 | 0 | 0 |
| miR-770 | 0 | 0 | 0 | 0 | 0 | 0 | 0 | 0 | 0 | 0 | 0 | 0 | 0    | 0    | 0 | 0 | 0 | 0 | 0 |
| miR-802 | 0 | 0 | 0 | 0 | 0 | 0 | 0 | 0 | 0 | 0 | 0 | 0 | 0    | 0    | 0 | 0 | 0 | 0 | 0 |
| miR-871 | 0 | 0 | 0 | 0 | 0 | 0 | 0 | 0 | 0 | 0 | 0 | 0 | 0    | 0    | 0 | 0 | 0 | 0 | 0 |
| miR-872 | 0 | 0 | 0 | 0 | 0 | 0 | 0 | 0 | 0 | 0 | 0 | 0 | 0    | 0    | 0 | 0 | 0 | 0 | 0 |
| miR-873 | 0 | 0 | 0 | 0 | 0 | 0 | 0 | 0 | 0 | 0 | 0 | 0 | 0    | 0    | 0 | 0 | 0 | 0 | 0 |
| miR-874 | 0 | 0 | 0 | 0 | 0 | 0 | 0 | 0 | 0 | 0 | 0 | 0 | 0    | 0    | 0 | 0 | 0 | 0 | 0 |
| miR-875 | 0 | 0 | 0 | 0 | 0 | 0 | 0 | 0 | 0 | 0 | 0 | 0 | 0    | 0    | 0 | 0 | 0 | 0 | 0 |
| miR-875 | 0 | 0 | 0 | 0 | 0 | 0 | 0 | 0 | 0 | 0 | 0 | 0 | 0    | 0    | 0 | 0 | 0 | 0 | 0 |
| miR-876 | 0 | 0 | 0 | 0 | 0 | 0 | 0 | 0 | 0 | 0 | 0 | 0 | 0    | 0    | 0 | 0 | 0 | 0 | 0 |
| miR-876 | 0 | 0 | 0 | 0 | 0 | 0 | 0 | 0 | 0 | 0 | 0 | 0 | 0    | 0    | 0 | 0 | 0 | 0 | 0 |
| miR-877 | 0 | 0 | 0 | 0 | 0 | 0 | 0 | 0 | 0 | 0 | 0 | 0 | 0    | 0    | 0 | 0 | 0 | 0 | 0 |
| miR-885 | 0 | 0 | 0 | 0 | 0 | 0 | 0 | 0 | 0 | 0 | 0 | 0 | 0    | 0    | 0 | 0 | 0 | 0 | 0 |
| miR-885 | 0 | 0 | 0 | 0 | 0 | 0 | 0 | 0 | 0 | 0 | 0 | 0 | 0    | 0    | 0 | 0 | 0 | 0 | 0 |
| miR-887 | 0 | 0 | 0 | 0 | 0 | 0 | 0 | 0 | 0 | 0 | 0 | 0 | 0    | 0    | 0 | 0 | 0 | 0 | 0 |
| miR-888 | 0 | 0 | 0 | 0 | 0 | 0 | 0 | 0 | 0 | 0 | 0 | 0 | 0    | 0    | 0 | 0 | 0 | 0 | 0 |
| miR-889 | 0 | 0 | 0 | 0 | 0 | 0 | 0 | 0 | 0 | 0 | 0 | 0 | 0    | 0    | 0 | 0 | 0 | 0 | 0 |
| miR-890 | 0 | 0 | 0 | 0 | 0 | 0 | 0 | 0 | 0 | 0 | 0 | 0 | 0    | 0    | 0 | 0 | 0 | 0 | 0 |

Feuille1

|          |      |      |      |      |      |      |      |      |   |   |      |      |      |      |      |      |      |      |   |
|----------|------|------|------|------|------|------|------|------|---|---|------|------|------|------|------|------|------|------|---|
| miR-891a | 0    | 0    | 0    | 0    | 0    | 0    | 0    | 0    | 0 | 0 | 0    | 0    | 0    | 0    | 0    | 0    | 0    | 0    | 0 |
| miR-891b | 0    | 0    | 0    | 0    | 0    | 0    | 0    | 0    | 0 | 0 | 0    | 0    | 0    | 0    | 0    | 0    | 0    | 0    | 0 |
| miR-892a | 0    | 0    | 0    | 0    | 0    | 0    | 0    | 0    | 0 | 0 | 0    | 0    | 0    | 0    | 0    | 0    | 0    | 0    | 0 |
| miR-892b | 0    | 0    | 0    | 0    | 0    | 0    | 0    | 0    | 0 | 0 | 0    | 0    | 0    | 0    | 0    | 0    | 0    | 0    | 0 |
| miR-9    | 0    | 0.01 | 0    | 0    | 0.03 | 0    | 0    | 0    | 0 | 0 | 0    | 0.09 | 0.17 | 0.17 | 0.01 | 0    | 0    | 0    | 0 |
| miR-92a  | 0.02 | 0.02 | 0.01 | 0.01 | 0.02 | 0    | 0.01 | 0    | 0 | 0 | 0.01 | 0    | 0    | 0    | 0.03 | 0.01 | 0.01 | 0.01 | 0 |
| miR-92b  | 0    | 0    | 0    | 0    | 0    | 0    | 0    | 0    | 0 | 0 | 0    | 0.01 | 0    | 0    | 0    | 0    | 0    | 0    | 0 |
| miR-93   | 0.01 | 0.02 | 0.01 | 0    | 0    | 0.01 | 0    | 0.01 | 0 | 0 | 0.01 | 0    | 0    | 0    | 0.01 | 0.01 | 0    | 0    | 0 |
| miR-95   | 0    | 0    | 0    | 0    | 0    | 0    | 0    | 0    | 0 | 0 | 0    | 0    | 0    | 0    | 0    | 0    | 0    | 0    | 0 |
| miR-96   | 0    | 0    | 0    | 0    | 0    | 0    | 0    | 0    | 0 | 0 | 0    | 0    | 0    | 0    | 0    | 0    | 0    | 0    | 0 |
| miR-98   | 0    | 0    | 0    | 0    | 0    | 0    | 0    | 0    | 0 | 0 | 0    | 0    | 0    | 0    | 0.01 | 0    | 0    | 0    | 0 |
| miR-99a  | 0    | 0    | 0    | 0    | 0    | 0.01 | 0    | 0    | 0 | 0 | 0    | 0.03 | 0.02 | 0.02 | 0.01 | 0.01 | 0    | 0    | 0 |
| miR-99b  | 0    | 0    | 0    | 0    | 0    | 0.15 | 0    | 0.06 | 0 | 0 | 0    | 0.02 | 0.01 | 0.02 | 0    | 0    | 0    | 0    | 0 |
|          | 0.97 |      |      |      |      |      |      |      |   |   |      |      |      |      |      |      |      |      |   |

Feuille1

|                                                                                                                                                  |      |      |      |      |      |      |      |      |      |      |      |      |      |      |      |      |      |      |      |      |
|--------------------------------------------------------------------------------------------------------------------------------------------------|------|------|------|------|------|------|------|------|------|------|------|------|------|------|------|------|------|------|------|------|
| miR_B-miR_B-miR_B-miR_B-miR_B-miR_B-miR_B-miR_B-miR_B-miR_B-miR_B-miR_B-miR_B-miR_B-miR_B-miR_B-miR_B-miR_B-miR_B-miR_B-miR_B-miR_B-miR_B-miR_B- |      |      |      |      |      |      |      |      |      |      |      |      |      |      |      |      |      |      |      |      |
| 0.01                                                                                                                                             | 0.05 | 0.04 | 0.02 | 0.02 | 0.03 | 0.01 | 0.05 | 0    | 0.05 | 0.09 | 0.05 | 0.04 | 0.03 | 0.04 | 0.02 | 0.02 | 0.01 | 0.01 | 0.01 | 0.02 |
| 0.01                                                                                                                                             | 0.02 | 0.01 | 0    | 0.02 | 0    | 0    | 0.01 | 0.01 | 0.02 | 0.02 | 0.02 | 0.01 | 0.01 | 0.02 | 0    | 0    | 0    | 0    | 0    | 0    |
| 0                                                                                                                                                | 0    | 0.01 | 0    | 0    | 0    | 0    | 0    | 0    | 0    | 0    | 0    | 0    | 0    | 0    | 0    | 0    | 0    | 0    | 0    | 0    |
| 0                                                                                                                                                | 0.01 | 0    | 0.01 | 0    | 0    | 0    | 0.01 | 0    | 0.01 | 0.02 | 0.01 | 0    | 0    | 0    | 0    | 0    | 0    | 0    | 0    | 0    |
| 0                                                                                                                                                | 0    | 0.01 | 0    | 0    | 0    | 0    | 0    | 0    | 0    | 0    | 0    | 0    | 0    | 0    | 0    | 0    | 0    | 0    | 0    | 0    |
| 0.01                                                                                                                                             | 0.02 | 0.01 | 0.01 | 0    | 0.02 | 0.01 | 0.02 | 0    | 0.05 | 0.03 | 0.01 | 0.01 | 0.01 | 0.03 | 0.02 | 0.04 | 0.08 | 0.02 | 0.01 | 0.02 |
| 0                                                                                                                                                | 0.01 | 0    | 0    | 0    | 0    | 0.01 | 0.01 | 0    | 0.01 | 0.01 | 0.01 | 0.01 | 0.01 | 0.02 | 0.01 | 0    | 0.01 | 0.01 | 0    | 0.01 |
| 0                                                                                                                                                | 0    | 0    | 0    | 0    | 0.01 | 0    | 0.01 | 0    | 0.01 | 0    | 0    | 0    | 0.01 | 0.01 | 0    | 0    | 0.01 | 0    | 0    | 0    |
| 0                                                                                                                                                | 0    | 0    | 0    | 0    | 0    | 0    | 0    | 0    | 0    | 0    | 0    | 0    | 0    | 0    | 0    | 0    | 0    | 0    | 0    | 0    |
| 0                                                                                                                                                | 0    | 0    | 0    | 0    | 0    | 0    | 0    | 0    | 0    | 0    | 0    | 0    | 0    | 0    | 0    | 0    | 0    | 0    | 0    | 0    |
| 0                                                                                                                                                | 0    | 0    | 0    | 0    | 0    | 0    | 0    | 0    | 0    | 0    | 0    | 0    | 0    | 0    | 0    | 0    | 0    | 0    | 0    | 0    |
| 0                                                                                                                                                | 0    | 0    | 0    | 0    | 0    | 0    | 0    | 0    | 0    | 0    | 0    | 0    | 0    | 0    | 0    | 0    | 0    | 0    | 0    | 0    |
| 0                                                                                                                                                | 0    | 0    | 0    | 0    | 0    | 0    | 0    | 0    | 0    | 0    | 0    | 0    | 0    | 0    | 0    | 0    | 0    | 0    | 0    | 0    |
| 0                                                                                                                                                | 0    | 0    | 0    | 0    | 0    | 0    | 0    | 0    | 0    | 0    | 0    | 0    | 0    | 0    | 0    | 0    | 0    | 0    | 0    | 0    |
| 0                                                                                                                                                | 0    | 0    | 0    | 0    | 0    | 0    | 0    | 0    | 0    | 0    | 0    | 0    | 0    | 0    | 0    | 0    | 0    | 0    | 0    | 0    |
| 0                                                                                                                                                | 0    | 0    | 0    | 0    | 0    | 0    | 0    | 0    | 0    | 0    | 0    | 0    | 0    | 0    | 0    | 0    | 0    | 0    | 0    | 0    |
| 0                                                                                                                                                | 0    | 0    | 0    | 0    | 0    | 0    | 0    | 0    | 0    | 0    | 0    | 0    | 0    | 0    | 0    | 0    | 0    | 0    | 0    | 0    |
| 0                                                                                                                                                | 0    | 0    | 0    | 0    | 0    | 0    | 0    | 0    | 0    | 0    | 0    | 0    | 0    | 0    | 0    | 0    | 0    | 0    | 0    | 0    |
| 0                                                                                                                                                | 0    | 0    | 0    | 0    | 0    | 0    | 0    | 0    | 0    | 0    | 0    | 0    | 0    | 0    | 0    | 0    | 0    | 0    | 0    | 0    |
| 0                                                                                                                                                | 0    | 0.01 | 0    | 0    | 0    | 0    | 0    | 0    | 0    | 0    | 0    | 0    | 0    | 0    | 0    | 0    | 0    | 0    | 0    | 0    |
| 0                                                                                                                                                | 0    | 0    | 0    | 0.01 | 0    | 0    | 0    | 0    | 0    | 0    | 0    | 0    | 0    | 0    | 0    | 0    | 0    | 0    | 0    | 0    |
| 0.02                                                                                                                                             | 0.08 | 0.03 | 0.09 | 0.05 | 0.01 | 0.05 | 0.01 | 0.04 | 0.03 | 0    | 0.05 | 0.09 | 0    | 0.05 | 0    | 0    | 0    | 0    | 0    | 0    |
| 0                                                                                                                                                | 0    | 0    | 0    | 0    | 0    | 0    | 0    | 0    | 0    | 0    | 0    | 0    | 0    | 0    | 0    | 0    | 0    | 0    | 0    | 0    |
| 0                                                                                                                                                | 0    | 0    | 0    | 0    | 0    | 0    | 0    | 0    | 0    | 0    | 0    | 0    | 0    | 0    | 0    | 0    | 0    | 0    | 0    | 0    |
| 0                                                                                                                                                | 0.01 | 0    | 0    | 0    | 0.01 | 0    | 0.02 | 0    | 0    | 0.01 | 0    | 0    | 0    | 0    | 0    | 0    | 0    | 0    | 0    | 0    |
| 0                                                                                                                                                | 0.01 | 0    | 0    | 0    | 0.01 | 0    | 0.02 | 0    | 0    | 0    | 0    | 0    | 0    | 0    | 0    | 0    | 0    | 0    | 0    | 0    |
| 0                                                                                                                                                | 0    | 0    | 0    | 0    | 0    | 0    | 0    | 0    | 0    | 0    | 0    | 0    | 0    | 0    | 0    | 0    | 0    | 0    | 0    | 0    |
| 0                                                                                                                                                | 0    | 0    | 0    | 0    | 0    | 0    | 0    | 0    | 0    | 0    | 0    | 0    | 0    | 0    | 0    | 0    | 0    | 0    | 0    | 0    |
| 0                                                                                                                                                | 0    | 0    | 0    | 0    | 0    | 0    | 0    | 0    | 0    | 0    | 0    | 0    | 0    | 0    | 0    | 0    | 0    | 0    | 0    | 0    |
| 0                                                                                                                                                | 0    | 0    | 0    | 0    | 0    | 0    | 0    | 0    | 0    | 0    | 0    | 0    | 0    | 0    | 0    | 0    | 0    | 0    | 0    | 0    |
| 0                                                                                                                                                | 0    | 0    | 0    | 0    | 0    | 0    | 0    | 0    | 0    | 0    | 0    | 0    | 0    | 0    | 0    | 0    | 0    | 0    | 0    | 0    |
| 0.01                                                                                                                                             | 0    | 0.01 | 0.02 | 0.01 | 0    | 0    | 0    | 0    | 0    | 0.01 | 0.01 | 0    | 0    | 0    | 0    | 0    | 0    | 0    | 0    | 0    |
| 0                                                                                                                                                | 0    | 0    | 0    | 0    | 0    | 0    | 0    | 0    | 0    | 0    | 0    | 0    | 0    | 0    | 0    | 0    | 0    | 0    | 0    | 0    |



Feuille1

|      |      |      |      |      |      |      |      |      |      |      |      |      |      |      |      |      |      |      |      |      |
|------|------|------|------|------|------|------|------|------|------|------|------|------|------|------|------|------|------|------|------|------|
| 0    | 0    | 0    | 0    | 0    | 0    | 0    | 0    | 0    | 0    | 0    | 0    | 0    | 0    | 0    | 0    | 0    | 0    | 0    | 0    | 0    |
| 0    | 0    | 0    | 0    | 0    | 0    | 0    | 0    | 0    | 0    | 0    | 0    | 0    | 0    | 0    | 0    | 0    | 0    | 0    | 0    | 0    |
| 0    | 0    | 0    | 0    | 0    | 0    | 0    | 0    | 0    | 0    | 0    | 0    | 0    | 0    | 0    | 0    | 0    | 0    | 0    | 0    | 0    |
| 0    | 0    | 0    | 0    | 0    | 0    | 0    | 0    | 0    | 0    | 0    | 0    | 0    | 0    | 0    | 0    | 0    | 0    | 0    | 0    | 0    |
| 0    | 0    | 0    | 0    | 0    | 0    | 0    | 0    | 0    | 0    | 0    | 0    | 0    | 0    | 0    | 0    | 0    | 0    | 0    | 0    | 0    |
| 0    | 0    | 0    | 0    | 0    | 0    | 0    | 0    | 0    | 0    | 0    | 0    | 0    | 0    | 0    | 0    | 0    | 0    | 0    | 0    | 0    |
| 0    | 0    | 0    | 0    | 0    | 0    | 0    | 0    | 0    | 0    | 0    | 0    | 0    | 0    | 0    | 0    | 0    | 0    | 0    | 0    | 0    |
| 0    | 0    | 0    | 0    | 0    | 0    | 0    | 0    | 0    | 0    | 0    | 0    | 0    | 0    | 0    | 0    | 0    | 0    | 0    | 0    | 0    |
| 0    | 0    | 0    | 0    | 0    | 0    | 0    | 0    | 0    | 0    | 0    | 0    | 0    | 0    | 0    | 0    | 0    | 0    | 0    | 0    | 0    |
| 0    | 0    | 0    | 0    | 0    | 0    | 0    | 0    | 0    | 0    | 0    | 0    | 0    | 0    | 0    | 0    | 0    | 0    | 0    | 0    | 0    |
| 0    | 0    | 0    | 0    | 0.01 | 0    | 0.01 | 0    | 0    | 0    | 0    | 0    | 0.01 | 0    | 0    | 0    | 0    | 0    | 0    | 0    | 0    |
| 0.01 | 0.01 | 0.01 | 0.01 | 0.02 | 0.01 | 0.01 | 0    | 0.02 | 0    | 0    | 0.01 | 0.01 | 0.01 | 0.01 | 0.01 | 0.01 | 0.01 | 0.01 | 0.01 | 0.01 |
| 0    | 0    | 0    | 0    | 0    | 0    | 0    | 0    | 0    | 0    | 0.01 | 0    | 0    | 0    | 0    | 0    | 0    | 0    | 0    | 0    | 0    |
| 0.08 | 0.1  | 0.01 | 0.08 | 0.04 | 0.13 | 0.08 | 0.13 | 0.09 | 0.12 | 0.07 | 0.07 | 0.1  | 0.1  | 0.13 | 0.16 | 0.24 | 0.18 | 0.22 | 0.19 | 0.26 |
| 0.2  | 0.17 | 0.06 | 0.36 | 0.09 | 0.27 | 0.17 | 0.18 | 0.17 | 0.09 | 0.08 | 0.21 | 0.2  | 0.39 | 0.13 | 0.35 | 0.13 | 0.07 | 0.13 | 0.15 | 0.14 |
| 0    | 0    | 0    | 0    | 0    | 0    | 0.01 | 0    | 0.01 | 0.01 | 0    | 0    | 0    | 0    | 0    | 0    | 0    | 0    | 0    | 0    | 0    |
| 0.13 | 0.01 | 0.07 | 0.01 | 0.16 | 0.01 | 0.07 | 0.01 | 0.12 | 0.06 | 0.01 | 0.15 | 0    | 0    | 0.01 | 0    | 0    | 0    | 0    | 0    | 0    |
| 0    | 0    | 0    | 0    | 0    | 0    | 0    | 0    | 0    | 0    | 0    | 0    | 0    | 0    | 0    | 0    | 0    | 0    | 0    | 0    | 0    |
| 0    | 0.02 | 0    | 0.01 | 0.01 | 0.02 | 0    | 0.02 | 0    | 0    | 0.01 | 0    | 0.01 | 0    | 0    | 0    | 0.03 | 0.04 | 0    | 0    | 0    |
| 0    | 0    | 0    | 0    | 0    | 0    | 0    | 0    | 0    | 0    | 0    | 0    | 0    | 0    | 0    | 0    | 0    | 0    | 0    | 0    | 0    |
| 0    | 0    | 0    | 0    | 0    | 0    | 0    | 0    | 0    | 0    | 0    | 0    | 0    | 0    | 0    | 0    | 0    | 0    | 0    | 0    | 0    |
| 0    | 0    | 0    | 0    | 0    | 0    | 0    | 0    | 0    | 0    | 0    | 0    | 0    | 0    | 0    | 0    | 0    | 0    | 0    | 0    | 0    |
| 0    | 0    | 0    | 0    | 0    | 0    | 0    | 0    | 0    | 0    | 0    | 0    | 0    | 0    | 0    | 0    | 0    | 0    | 0    | 0    | 0    |
| 0    | 0    | 0    | 0    | 0    | 0    | 0    | 0    | 0    | 0    | 0    | 0    | 0    | 0    | 0    | 0    | 0    | 0    | 0    | 0    | 0    |
| 0    | 0    | 0    | 0    | 0    | 0    | 0    | 0    | 0    | 0    | 0    | 0    | 0    | 0    | 0    | 0    | 0    | 0    | 0    | 0    | 0    |
| 0    | 0    | 0    | 0    | 0    | 0    | 0    | 0    | 0    | 0    | 0    | 0    | 0    | 0    | 0    | 0    | 0    | 0    | 0    | 0    | 0    |
| 0    | 0    | 0    | 0    | 0    | 0    | 0    | 0    | 0    | 0    | 0    | 0    | 0    | 0    | 0    | 0    | 0    | 0    | 0    | 0    | 0    |
| 0    | 0    | 0    | 0    | 0    | 0    | 0    | 0    | 0    | 0    | 0    | 0    | 0    | 0    | 0    | 0    | 0    | 0    | 0    | 0    | 0    |
| 0    | 0    | 0    | 0    | 0    | 0    | 0    | 0    | 0    | 0    | 0    | 0    | 0    | 0    | 0    | 0    | 0    | 0    | 0    | 0    | 0    |
| 0    | 0    | 0    | 0    | 0    | 0    | 0    | 0    | 0    | 0    | 0    | 0    | 0    | 0    | 0    | 0    | 0    | 0    | 0    | 0    | 0    |
| 0    | 0    | 0    | 0    | 0    | 0    | 0    | 0    | 0    | 0    | 0    | 0    | 0    | 0    | 0    | 0    | 0    | 0    | 0    | 0    | 0    |
| 0    | 0.01 | 0    | 0    | 0.01 | 0    | 0    | 0    | 0    | 0    | 0.05 | 0    | 0    | 0    | 0.01 | 0    | 0.22 | 0.11 | 0.01 | 0.01 | 0.01 |
| 0.06 | 0.03 | 0.04 | 0.03 | 0.02 | 0.04 | 0.07 | 0.04 | 0.06 | 0.07 | 0.04 | 0.06 | 0.03 | 0.02 | 0.03 | 0.03 | 0.02 | 0.02 | 0.07 | 0.03 | 0.01 |
| 0    | 0    | 0.01 | 0    | 0    | 0    | 0    | 0    | 0    | 0.01 | 0    | 0    | 0    | 0    | 0    | 0    | 0    | 0    | 0    | 0    | 0    |

Feuille1

|      |      |      |      |      |      |      |      |      |      |      |      |      |      |      |      |      |      |      |     |      |
|------|------|------|------|------|------|------|------|------|------|------|------|------|------|------|------|------|------|------|-----|------|
| 0.19 | 0.09 | 0.03 | 0.04 | 0.11 | 0.11 | 0.18 | 0.11 | 0.22 | 0.17 | 0.1  | 0.1  | 0.1  | 0.06 | 0.11 | 0.1  | 0.04 | 0.05 | 0.09 | 0.1 | 0.05 |
| 0.01 | 0    | 0.02 | 0.01 | 0    | 0.01 | 0.01 | 0.01 | 0.01 | 0    | 0.02 | 0.01 | 0.01 | 0    | 0    | 0    | 0    | 0    | 0    | 0   | 0    |
| 0.01 | 0.07 | 0    | 0.03 | 0    | 0.06 | 0    | 0.05 | 0    | 0    | 0.02 | 0.02 | 0.09 | 0.01 | 0.02 | 0    | 0    | 0.01 | 0    | 0   | 0    |
| 0    | 0.01 | 0    | 0    | 0    | 0.01 | 0    | 0.02 | 0    | 0    | 0    | 0    | 0.01 | 0    | 0    | 0    | 0    | 0.01 | 0    | 0   | 0    |
| 0    | 0    | 0    | 0    | 0    | 0    | 0    | 0    | 0    | 0    | 0    | 0    | 0    | 0    | 0    | 0    | 0    | 0    | 0    | 0   | 0    |
| 0    | 0    | 0.01 | 0    | 0    | 0    | 0    | 0    | 0    | 0    | 0    | 0    | 0    | 0    | 0    | 0    | 0    | 0    | 0    | 0   | 0    |
| 0    | 0    | 0    | 0    | 0    | 0    | 0    | 0    | 0    | 0    | 0    | 0    | 0    | 0    | 0    | 0    | 0    | 0    | 0    | 0   | 0    |
| 0    | 0    | 0    | 0    | 0    | 0    | 0    | 0    | 0    | 0    | 0    | 0    | 0    | 0    | 0    | 0    | 0    | 0    | 0    | 0   | 0    |
| 0    | 0    | 0    | 0    | 0    | 0    | 0    | 0    | 0    | 0    | 0    | 0    | 0    | 0    | 0    | 0    | 0    | 0    | 0    | 0   | 0    |
| 0    | 0    | 0    | 0    | 0.01 | 0    | 0    | 0    | 0    | 0    | 0.01 | 0    | 0    | 0    | 0    | 0    | 0    | 0    | 0    | 0   | 0    |
| 0    | 0    | 0    | 0    | 0.01 | 0    | 0    | 0    | 0    | 0    | 0    | 0    | 0    | 0    | 0.01 | 0    | 0    | 0    | 0    | 0   | 0    |
| 0    | 0    | 0    | 0    | 0    | 0    | 0    | 0    | 0    | 0    | 0    | 0    | 0    | 0    | 0    | 0    | 0    | 0    | 0    | 0   | 0    |
| 0    | 0    | 0    | 0    | 0    | 0    | 0    | 0    | 0    | 0    | 0    | 0    | 0    | 0    | 0    | 0    | 0    | 0    | 0    | 0   | 0    |
| 0    | 0    | 0    | 0    | 0    | 0    | 0    | 0    | 0    | 0    | 0    | 0    | 0    | 0    | 0    | 0    | 0    | 0    | 0    | 0   | 0    |
| 0    | 0    | 0    | 0    | 0    | 0    | 0    | 0    | 0    | 0    | 0    | 0    | 0    | 0    | 0    | 0    | 0    | 0    | 0    | 0   | 0    |
| 0    | 0    | 0.01 | 0    | 0.01 | 0    | 0    | 0    | 0    | 0    | 0.03 | 0    | 0    | 0    | 0.01 | 0    | 0    | 0    | 0    | 0   | 0    |
| 0    | 0    | 0    | 0    | 0    | 0    | 0    | 0    | 0    | 0    | 0    | 0    | 0    | 0    | 0    | 0    | 0    | 0    | 0    | 0   | 0    |
| 0    | 0    | 0    | 0    | 0    | 0    | 0    | 0    | 0    | 0    | 0    | 0    | 0    | 0    | 0    | 0    | 0    | 0    | 0    | 0   | 0    |
| 0    | 0    | 0    | 0    | 0    | 0    | 0    | 0    | 0    | 0    | 0    | 0    | 0    | 0    | 0    | 0    | 0    | 0    | 0    | 0   | 0    |
| 0    | 0    | 0    | 0    | 0    | 0    | 0    | 0    | 0    | 0    | 0    | 0    | 0    | 0    | 0    | 0    | 0    | 0    | 0    | 0   | 0    |
| 0    | 0    | 0    | 0    | 0    | 0    | 0    | 0    | 0    | 0    | 0    | 0    | 0    | 0    | 0    | 0    | 0    | 0    | 0    | 0   | 0    |
| 0    | 0    | 0    | 0    | 0    | 0    | 0    | 0    | 0    | 0    | 0    | 0    | 0    | 0    | 0    | 0    | 0    | 0    | 0    | 0   | 0    |
| 0    | 0    | 0    | 0    | 0    | 0    | 0    | 0    | 0    | 0    | 0    | 0    | 0    | 0    | 0    | 0    | 0    | 0    | 0    | 0   | 0    |
| 0    | 0    | 0    | 0    | 0    | 0    | 0    | 0    | 0    | 0    | 0    | 0    | 0    | 0    | 0    | 0    | 0    | 0    | 0    | 0   | 0    |
| 0    | 0    | 0    | 0    | 0    | 0    | 0    | 0    | 0    | 0    | 0    | 0    | 0    | 0    | 0    | 0    | 0    | 0    | 0    | 0   | 0    |
| 0    | 0    | 0    | 0    | 0    | 0    | 0    | 0    | 0    | 0    | 0    | 0    | 0    | 0    | 0    | 0    | 0    | 0    | 0    | 0   | 0    |
| 0    | 0    | 0    | 0    | 0    | 0    | 0    | 0    | 0    | 0    | 0    | 0    | 0    | 0    | 0    | 0    | 0    | 0    | 0    | 0   | 0    |
| 0    | 0    | 0    | 0    | 0    | 0    | 0    | 0    | 0    | 0    | 0    | 0    | 0    | 0    | 0    | 0    | 0    | 0    | 0    | 0   | 0    |
| 0    | 0    | 0    | 0    | 0    | 0    | 0    | 0    | 0    | 0    | 0    | 0    | 0    | 0    | 0    | 0    | 0    | 0    | 0    | 0   | 0    |
| 0    | 0    | 0    | 0    | 0    | 0    | 0    | 0    | 0    | 0    | 0    | 0    | 0    | 0    | 0    | 0    | 0    | 0    | 0    | 0   | 0    |
| 0    | 0    | 0    | 0    | 0    | 0    | 0    | 0    | 0    | 0    | 0    | 0    | 0    | 0    | 0    | 0    | 0    | 0    | 0    | 0   | 0    |
| 0    | 0    | 0    | 0    | 0    | 0    | 0    | 0    | 0    | 0    | 0    | 0    | 0    | 0    | 0    | 0    | 0    | 0    | 0    | 0   | 0    |
| 0    | 0    | 0    | 0    | 0    | 0    | 0    | 0    | 0    | 0    | 0    | 0    | 0    | 0    | 0    | 0    | 0    | 0    | 0    | 0   | 0    |
| 0    | 0    | 0    | 0    | 0    | 0    | 0    | 0    | 0    | 0    | 0    | 0    | 0    | 0    | 0    | 0    | 0    | 0    | 0    | 0   | 0    |
| 0    | 0    | 0    | 0    | 0    | 0    | 0    | 0    | 0    | 0    | 0    | 0    | 0    | 0    | 0    | 0    | 0    | 0    | 0    | 0   | 0    |
| 0    | 0    | 0    | 0    | 0    | 0    | 0    | 0    | 0    | 0    | 0    | 0    | 0    | 0    | 0    | 0    | 0    | 0    | 0    | 0   | 0    |
| 0    | 0    | 0    | 0    | 0    | 0    | 0    | 0    | 0    | 0    | 0    | 0    | 0    | 0    | 0    | 0    | 0    | 0    | 0    | 0   | 0    |
| 0    | 0    | 0    | 0    | 0    | 0    | 0    | 0    | 0    | 0    | 0    | 0    | 0    | 0    | 0    | 0    | 0    | 0    | 0    | 0   | 0    |
| 0    | 0.01 | 0    | 0    | 0    | 0    | 0    | 0    | 0    | 0    | 0.02 | 0    | 0    | 0    | 0.01 | 0    | 0.01 | 0.02 | 0    | 0   | 0    |
| 0    | 0.01 | 0.01 | 0.01 | 0.01 | 0    | 0.01 | 0    | 0    | 0.02 | 0.01 | 0    | 0    | 0    | 0.01 | 0.01 | 0.01 | 0.04 | 0    | 0   | 0    |
| 0    | 0    | 0    | 0    | 0    | 0    | 0    | 0    | 0    | 0    | 0    | 0    | 0    | 0    | 0    | 0    | 0    | 0    | 0    | 0   | 0    |

Feuille1

|      |      |      |      |      |      |      |      |      |      |      |      |      |      |      |      |      |      |      |      |      |
|------|------|------|------|------|------|------|------|------|------|------|------|------|------|------|------|------|------|------|------|------|
| 0    | 0    | 0    | 0    | 0    | 0    | 0    | 0    | 0    | 0    | 0    | 0    | 0    | 0    | 0    | 0    | 0    | 0    | 0    | 0    | 0    |
| 0    | 0    | 0    | 0    | 0    | 0    | 0    | 0    | 0    | 0    | 0    | 0    | 0    | 0    | 0    | 0    | 0    | 0    | 0    | 0    | 0    |
| 0    | 0    | 0    | 0    | 0    | 0    | 0    | 0    | 0    | 0    | 0    | 0    | 0    | 0    | 0    | 0    | 0    | 0    | 0    | 0    | 0    |
| 0    | 0    | 0    | 0    | 0    | 0    | 0    | 0    | 0    | 0    | 0    | 0    | 0    | 0    | 0    | 0    | 0    | 0    | 0    | 0    | 0    |
| 0    | 0    | 0    | 0    | 0    | 0    | 0    | 0    | 0    | 0    | 0    | 0    | 0    | 0    | 0    | 0    | 0    | 0    | 0    | 0    | 0    |
| 0    | 0    | 0    | 0    | 0    | 0    | 0    | 0    | 0    | 0    | 0    | 0    | 0    | 0    | 0    | 0    | 0    | 0    | 0    | 0    | 0    |
| 0    | 0    | 0    | 0    | 0    | 0    | 0    | 0    | 0    | 0    | 0    | 0    | 0    | 0    | 0    | 0    | 0    | 0    | 0    | 0    | 0    |
| 0    | 0    | 0    | 0    | 0    | 0    | 0    | 0    | 0    | 0    | 0    | 0    | 0    | 0    | 0    | 0    | 0    | 0    | 0    | 0    | 0    |
| 0    | 0    | 0    | 0    | 0    | 0    | 0    | 0    | 0    | 0    | 0    | 0    | 0    | 0    | 0    | 0    | 0    | 0    | 0    | 0    | 0    |
| 0    | 0.01 | 0.02 | 0    | 0.01 | 0.01 | 0    | 0    | 0    | 0    | 0.01 | 0    | 0    | 0    | 0    | 0    | 0    | 0    | 0.01 | 0    | 0    |
| 0    | 0    | 0    | 0    | 0    | 0.01 | 0    | 0    | 0    | 0    | 0    | 0    | 0    | 0    | 0    | 0    | 0    | 0    | 0    | 0    | 0    |
| 0.01 | 0.01 | 0.14 | 0.02 | 0.09 | 0.01 | 0.02 | 0.01 | 0.01 | 0.03 | 0.07 | 0.01 | 0    | 0.02 | 0.02 | 0.01 | 0.05 | 0.08 | 0.07 | 0.04 | 0.04 |
| 0    | 0    | 0    | 0    | 0    | 0    | 0    | 0    | 0    | 0    | 0    | 0    | 0    | 0    | 0    | 0    | 0    | 0    | 0    | 0    | 0    |
| 0    | 0    | 0    | 0    | 0    | 0    | 0    | 0    | 0    | 0    | 0    | 0    | 0    | 0    | 0    | 0    | 0    | 0    | 0    | 0    | 0    |
| 0    | 0    | 0    | 0    | 0    | 0    | 0    | 0    | 0    | 0    | 0    | 0    | 0    | 0    | 0    | 0    | 0    | 0    | 0    | 0    | 0    |
| 0    | 0    | 0    | 0    | 0    | 0    | 0    | 0    | 0    | 0    | 0    | 0    | 0    | 0    | 0    | 0    | 0    | 0    | 0    | 0    | 0    |
| 0    | 0    | 0    | 0    | 0    | 0    | 0    | 0    | 0    | 0    | 0    | 0    | 0    | 0    | 0    | 0    | 0    | 0    | 0    | 0    | 0    |
| 0    | 0    | 0    | 0    | 0    | 0    | 0    | 0    | 0    | 0    | 0    | 0    | 0    | 0    | 0    | 0    | 0    | 0    | 0    | 0    | 0    |
| 0    | 0    | 0    | 0    | 0    | 0    | 0    | 0    | 0    | 0    | 0    | 0    | 0    | 0    | 0    | 0    | 0    | 0    | 0    | 0    | 0    |
| 0    | 0    | 0    | 0    | 0    | 0    | 0    | 0    | 0    | 0    | 0    | 0    | 0    | 0    | 0    | 0    | 0    | 0    | 0    | 0    | 0    |
| 0    | 0    | 0    | 0    | 0    | 0    | 0    | 0    | 0    | 0    | 0    | 0    | 0    | 0    | 0    | 0    | 0    | 0    | 0    | 0    | 0    |
| 0    | 0    | 0.02 | 0    | 0.01 | 0    | 0.01 | 0    | 0.01 | 0    | 0.01 | 0    | 0    | 0    | 0    | 0    | 0    | 0    | 0    | 0    | 0    |
| 0    | 0    | 0    | 0    | 0    | 0    | 0    | 0    | 0    | 0    | 0    | 0    | 0    | 0    | 0    | 0    | 0    | 0    | 0    | 0    | 0    |
| 0    | 0    | 0    | 0    | 0    | 0    | 0    | 0    | 0    | 0    | 0    | 0    | 0    | 0    | 0    | 0    | 0    | 0    | 0    | 0    | 0    |
| 0    | 0    | 0    | 0    | 0    | 0    | 0    | 0    | 0    | 0    | 0    | 0    | 0    | 0    | 0    | 0    | 0    | 0    | 0    | 0    | 0    |
| 0    | 0    | 0    | 0    | 0    | 0    | 0    | 0    | 0    | 0    | 0    | 0    | 0    | 0    | 0    | 0    | 0    | 0    | 0    | 0    | 0    |
| 0    | 0    | 0    | 0    | 0    | 0    | 0    | 0    | 0    | 0    | 0    | 0    | 0    | 0    | 0    | 0    | 0    | 0    | 0    | 0    | 0    |
| 0    | 0.01 | 0    | 0    | 0    | 0    | 0    | 0    | 0.01 | 0    | 0    | 0    | 0    | 0.02 | 0    | 0    | 0    | 0    | 0.01 | 0    | 0    |
| 0.01 | 0    | 0    | 0    | 0.01 | 0    | 0.01 | 0    | 0.01 | 0.01 | 0    | 0    | 0    | 0    | 0    | 0    | 0    | 0    | 0    | 0    | 0    |
| 0    | 0    | 0    | 0    | 0    | 0    | 0    | 0    | 0    | 0    | 0    | 0    | 0    | 0    | 0    | 0    | 0    | 0    | 0    | 0    | 0    |
| 0    | 0    | 0.01 | 0    | 0    | 0    | 0    | 0    | 0    | 0    | 0    | 0    | 0    | 0    | 0    | 0    | 0    | 0    | 0.01 | 0    | 0    |
| 0    | 0    | 0.01 | 0    | 0    | 0    | 0    | 0    | 0    | 0    | 0    | 0    | 0    | 0    | 0    | 0    | 0    | 0    | 0    | 0    | 0    |
| 0    | 0.01 | 0.01 | 0    | 0    | 0.01 | 0    | 0    | 0.01 | 0    | 0    | 0    | 0    | 0    | 0    | 0    | 0.01 | 0    | 0    | 0    | 0    |
| 0    | 0    | 0.02 | 0.01 | 0.01 | 0    | 0.01 | 0    | 0    | 0    | 0.01 | 0    | 0    | 0    | 0    | 0    | 0    | 0.01 | 0    | 0    | 0    |
| 0    | 0.02 | 0.02 | 0    | 0.01 | 0.01 | 0.02 | 0.01 | 0    | 0.02 | 0.01 | 0.01 | 0.03 | 0.01 | 0.02 | 0.03 | 0.01 | 0.01 | 0.03 | 0.06 | 0.06 |

Feuille1

|      |      |      |      |      |      |      |      |      |      |      |      |      |      |      |      |      |      |      |      |      |
|------|------|------|------|------|------|------|------|------|------|------|------|------|------|------|------|------|------|------|------|------|
| 0.01 | 0.01 | 0    | 0    | 0    | 0    | 0    | 0    | 0    | 0.01 | 0.01 | 0    | 0.01 | 0.01 | 0.01 | 0.02 | 0    | 0.01 | 0.01 | 0.03 | 0.02 |
| 0.02 | 0.01 | 0.01 | 0    | 0.01 | 0.01 | 0.03 | 0    | 0.03 | 0.01 | 0.02 | 0.01 | 0.01 | 0    | 0.01 | 0    | 0.01 | 0.01 | 0    | 0    | 0    |
| 0    | 0    | 0    | 0    | 0.01 | 0    | 0    | 0    | 0    | 0    | 0    | 0    | 0    | 0    | 0    | 0    | 0    | 0    | 0    | 0    | 0    |
| 0    | 0    | 0    | 0    | 0.01 | 0    | 0    | 0    | 0    | 0    | 0.01 | 0    | 0    | 0    | 0    | 0    | 0    | 0    | 0    | 0    | 0    |
| 0    | 0.01 | 0.01 | 0.01 | 0.03 | 0    | 0    | 0    | 0    | 0    | 0    | 0    | 0    | 0    | 0    | 0    | 0    | 0    | 0.01 | 0.01 | 0.01 |
| 0    | 0    | 0    | 0    | 0    | 0    | 0    | 0    | 0    | 0    | 0    | 0    | 0    | 0    | 0    | 0    | 0    | 0    | 0    | 0    | 0    |
| 0    | 0    | 0    | 0    | 0    | 0    | 0    | 0    | 0    | 0    | 0    | 0    | 0    | 0    | 0    | 0    | 0    | 0    | 0    | 0    | 0    |
| 0    | 0    | 0    | 0    | 0    | 0    | 0    | 0    | 0    | 0    | 0    | 0    | 0    | 0    | 0    | 0    | 0    | 0    | 0    | 0    | 0    |
| 0    | 0    | 0    | 0    | 0    | 0    | 0    | 0    | 0    | 0    | 0    | 0    | 0    | 0    | 0    | 0    | 0    | 0    | 0    | 0    | 0    |
| 0    | 0    | 0    | 0    | 0    | 0    | 0    | 0    | 0    | 0    | 0    | 0    | 0    | 0    | 0    | 0    | 0    | 0    | 0    | 0    | 0    |
| 0    | 0    | 0    | 0    | 0    | 0    | 0    | 0    | 0    | 0    | 0    | 0    | 0    | 0    | 0    | 0    | 0    | 0    | 0    | 0    | 0    |
| 0    | 0    | 0    | 0    | 0    | 0    | 0    | 0    | 0    | 0    | 0    | 0    | 0    | 0    | 0    | 0    | 0    | 0    | 0    | 0    | 0    |
| 0    | 0    | 0    | 0    | 0    | 0    | 0    | 0    | 0    | 0    | 0    | 0    | 0    | 0    | 0    | 0    | 0    | 0    | 0    | 0    | 0    |
| 0    | 0    | 0    | 0    | 0    | 0    | 0    | 0    | 0    | 0    | 0    | 0    | 0    | 0    | 0    | 0    | 0    | 0    | 0    | 0    | 0    |
| 0    | 0    | 0.01 | 0.01 | 0    | 0    | 0.01 | 0    | 0    | 0    | 0.02 | 0.01 | 0.01 | 0.03 | 0.02 | 0.02 | 0    | 0.01 | 0.03 | 0.03 | 0.03 |
| 0.01 | 0.01 | 0.03 | 0.01 | 0.01 | 0.01 | 0.01 | 0.01 | 0.01 | 0    | 0.04 | 0.02 | 0.01 | 0.1  | 0.07 | 0.08 | 0.02 | 0.02 | 0.11 | 0.09 | 0.09 |
| 0    | 0    | 0    | 0    | 0    | 0    | 0    | 0    | 0    | 0    | 0.01 | 0.01 | 0    | 0.02 | 0    | 0.01 | 0    | 0    | 0.01 | 0.02 | 0.01 |
| 0    | 0    | 0    | 0    | 0    | 0    | 0    | 0    | 0    | 0    | 0    | 0    | 0    | 0    | 0    | 0    | 0    | 0    | 0    | 0    | 0    |
| 0    | 0    | 0    | 0    | 0    | 0    | 0    | 0    | 0    | 0    | 0    | 0    | 0    | 0    | 0    | 0    | 0    | 0    | 0    | 0    | 0    |
| 0    | 0    | 0    | 0    | 0    | 0    | 0    | 0    | 0    | 0    | 0    | 0    | 0    | 0    | 0    | 0    | 0    | 0    | 0    | 0    | 0    |
| 0    | 0    | 0    | 0    | 0    | 0    | 0    | 0    | 0    | 0    | 0    | 0    | 0    | 0    | 0    | 0    | 0    | 0    | 0    | 0    | 0    |
| 0    | 0    | 0    | 0    | 0    | 0    | 0    | 0    | 0    | 0    | 0    | 0    | 0    | 0    | 0    | 0    | 0    | 0    | 0    | 0    | 0    |
| 0    | 0    | 0    | 0    | 0    | 0    | 0    | 0    | 0    | 0    | 0    | 0    | 0    | 0    | 0    | 0    | 0    | 0    | 0    | 0    | 0    |
| 0    | 0    | 0    | 0    | 0    | 0    | 0    | 0.02 | 0    | 0    | 0    | 0    | 0    | 0    | 0    | 0    | 0    | 0    | 0    | 0    | 0    |
| 0    | 0    | 0    | 0    | 0    | 0    | 0    | 0    | 0    | 0    | 0.01 | 0    | 0    | 0    | 0    | 0    | 0    | 0    | 0    | 0    | 0    |
| 0    | 0    | 0    | 0    | 0    | 0    | 0    | 0    | 0    | 0    | 0    | 0    | 0    | 0    | 0    | 0    | 0    | 0    | 0    | 0    | 0    |
| 0    | 0.03 | 0.01 | 0.01 | 0    | 0.01 | 0.01 | 0.02 | 0.01 | 0    | 0    | 0.01 | 0.02 | 0.01 | 0.02 | 0.01 | 0.02 | 0.01 | 0.01 | 0.01 | 0.02 |
| 0    | 0.02 | 0.01 | 0.03 | 0.01 | 0.01 | 0.01 | 0    | 0.01 | 0    | 0.02 | 0.02 | 0.02 | 0.02 | 0.02 | 0.03 | 0.02 | 0.02 | 0.04 | 0.03 | 0.04 |
| 0    | 0    | 0    | 0    | 0    | 0    | 0    | 0    | 0    | 0    | 0    | 0    | 0    | 0    | 0    | 0    | 0    | 0    | 0    | 0    | 0    |
| 0.01 | 0.01 | 0.03 | 0.01 | 0.01 | 0.02 | 0.01 | 0.01 | 0.01 | 0    | 0    | 0    | 0    | 0.01 | 0    | 0    | 0    | 0    | 0    | 0    | 0.01 |
| 0    | 0    | 0    | 0    | 0    | 0.01 | 0    | 0.01 | 0    | 0    | 0    | 0    | 0    | 0    | 0.01 | 0    | 0    | 0    | 0    | 0    | 0    |
| 0    | 0    | 0    | 0    | 0    | 0    | 0    | 0    | 0    | 0    | 0    | 0    | 0    | 0    | 0    | 0    | 0    | 0    | 0    | 0    | 0    |
| 0    | 0    | 0    | 0    | 0    | 0    | 0    | 0    | 0    | 0    | 0    | 0    | 0    | 0    | 0    | 0    | 0    | 0    | 0    | 0    | 0    |
| 0    | 0    | 0    | 0    | 0    | 0    | 0    | 0    | 0    | 0    | 0    | 0    | 0    | 0    | 0    | 0    | 0    | 0    | 0    | 0    | 0    |
| 0    | 0    | 0    | 0    | 0    | 0    | 0    | 0    | 0    | 0    | 0    | 0    | 0    | 0    | 0    | 0    | 0    | 0    | 0    | 0    | 0    |
| 0    | 0    | 0    | 0    | 0    | 0    | 0    | 0    | 0    | 0    | 0    | 0    | 0    | 0    | 0    | 0    | 0    | 0    | 0    | 0    | 0    |
| 0    | 0    | 0    | 0    | 0    | 0    | 0    | 0    | 0    | 0    | 0    | 0    | 0    | 0    | 0    | 0    | 0    | 0    | 0    | 0    | 0    |
| 0    | 0    | 0    | 0    | 0    | 0    | 0    | 0    | 0    | 0    | 0    | 0    | 0    | 0    | 0    | 0    | 0    | 0    | 0    | 0    | 0    |
| 0    | 0    | 0    | 0    | 0    | 0    | 0    | 0    | 0    | 0    | 0    | 0    | 0    | 0    | 0    | 0    | 0    | 0    | 0    | 0    | 0    |





















Feuille1

|      |      |      |      |      |      |      |      |   |   |      |   |   |   |      |      |      |      |   |   |
|------|------|------|------|------|------|------|------|---|---|------|---|---|---|------|------|------|------|---|---|
| 0    | 0    | 0    | 0    | 0    | 0    | 0    | 0    | 0 | 0 | 0    | 0 | 0 | 0 | 0    | 0    | 0    | 0    | 0 | 0 |
| 0    | 0    | 0    | 0    | 0    | 0    | 0    | 0    | 0 | 0 | 0    | 0 | 0 | 0 | 0    | 0    | 0    | 0    | 0 | 0 |
| 0    | 0    | 0    | 0    | 0    | 0    | 0    | 0    | 0 | 0 | 0    | 0 | 0 | 0 | 0    | 0    | 0    | 0    | 0 | 0 |
| 0    | 0    | 0    | 0    | 0    | 0    | 0    | 0    | 0 | 0 | 0    | 0 | 0 | 0 | 0    | 0    | 0    | 0    | 0 | 0 |
| 0    | 0    | 0    | 0    | 0    | 0    | 0    | 0    | 0 | 0 | 0.01 | 0 | 0 | 0 | 0    | 0    | 0.01 | 0    | 0 | 0 |
| 0.01 | 0.01 | 0.01 | 0    | 0.01 | 0    | 0.01 | 0.01 | 0 | 0 | 0.02 | 0 | 0 | 0 | 0.02 | 0.01 | 0.01 | 0.02 | 0 | 0 |
| 0    | 0    | 0    | 0    | 0    | 0    | 0    | 0    | 0 | 0 | 0    | 0 | 0 | 0 | 0    | 0    | 0    | 0    | 0 | 0 |
| 0    | 0    | 0.03 | 0.01 | 0    | 0.01 | 0    | 0    | 0 | 0 | 0    | 0 | 0 | 0 | 0    | 0    | 0    | 0    | 0 | 0 |
| 0    | 0    | 0    | 0    | 0    | 0    | 0    | 0    | 0 | 0 | 0    | 0 | 0 | 0 | 0    | 0    | 0    | 0    | 0 | 0 |
| 0    | 0    | 0    | 0    | 0    | 0    | 0    | 0    | 0 | 0 | 0    | 0 | 0 | 0 | 0    | 0    | 0    | 0    | 0 | 0 |
| 0    | 0    | 0    | 0    | 0    | 0    | 0    | 0    | 0 | 0 | 0    | 0 | 0 | 0 | 0    | 0    | 0    | 0    | 0 | 0 |
| 0    | 0    | 0.01 | 0    | 0.01 | 0    | 0    | 0    | 0 | 0 | 0    | 0 | 0 | 0 | 0    | 0    | 0    | 0    | 0 | 0 |

Feuille1

| miR_B | miR_B | miR_B | miR_B | miR_B | miR_B | miR_B | miR_B | miR_B | miR_B | miR_B | miR_B | miR_B | miR_B | miR_B | miR_B | miR_B | miR_B | miR_B | miR_B | miR_B |
|-------|-------|-------|-------|-------|-------|-------|-------|-------|-------|-------|-------|-------|-------|-------|-------|-------|-------|-------|-------|-------|
| 0.02  | 0.01  | 0.02  | 0.03  | 0.03  | 0.01  | 0.02  | 0     | 0     | 0.02  | 0.01  | 0.03  | 0.03  | 0.01  | 0.04  | 0.03  | 0.03  | 0.03  | 0.02  | 0.02  | 0.03  |
| 0     | 0     | 0     | 0     | 0     | 0     | 0     | 0     | 0     | 0.06  | 0.05  | 0.02  | 0.04  | 0.01  | 0     | 0     | 0     | 0     | 0     | 0.01  | 0.02  |
| 0     | 0     | 0     | 0     | 0     | 0     | 0     | 0     | 0     | 0.01  | 0.01  | 0     | 0     | 0     | 0     | 0     | 0     | 0     | 0     | 0     | 0     |
| 0     | 0     | 0     | 0     | 0     | 0     | 0     | 0     | 0     | 0     | 0     | 0     | 0     | 0     | 0     | 0.01  | 0.01  | 0     | 0     | 0     | 0.01  |
| 0     | 0     | 0     | 0     | 0     | 0     | 0     | 0     | 0     | 0     | 0     | 0     | 0     | 0     | 0     | 0     | 0     | 0     | 0     | 0     | 0     |
| 0.02  | 0.03  | 0.02  | 0.03  | 0.02  | 0.02  | 0.02  | 0     | 0     | 0.01  | 0.01  | 0.01  | 0     | 0.01  | 0     | 0.01  | 0.02  | 0.06  | 0.06  | 0.01  | 0.01  |
| 0.01  | 0.01  | 0     | 0.01  | 0.01  | 0.01  | 0.01  | 0     | 0     | 0     | 0     | 0     | 0     | 0     | 0     | 0.01  | 0.01  | 0     | 0     | 0     | 0     |
| 0     | 0     | 0.01  | 0     | 0.01  | 0.01  | 0.01  | 0     | 0     | 0.02  | 0.01  | 0     | 0     | 0     | 0     | 0     | 0     | 0     | 0     | 0.01  | 0.01  |
| 0     | 0     | 0     | 0     | 0     | 0     | 0     | 0     | 0     | 0     | 0     | 0     | 0     | 0     | 0     | 0     | 0     | 0     | 0     | 0     | 0     |
| 0     | 0     | 0     | 0     | 0     | 0     | 0     | 0     | 0     | 0     | 0     | 0     | 0     | 0     | 0     | 0     | 0     | 0     | 0     | 0     | 0     |
| 0     | 0     | 0     | 0     | 0     | 0     | 0     | 0     | 0     | 0     | 0     | 0     | 0     | 0     | 0     | 0     | 0     | 0     | 0     | 0     | 0     |
| 0     | 0     | 0     | 0     | 0     | 0     | 0     | 0     | 0     | 0     | 0     | 0     | 0     | 0     | 0     | 0     | 0     | 0     | 0     | 0     | 0     |
| 0     | 0     | 0     | 0     | 0     | 0     | 0     | 0     | 0     | 0     | 0     | 0     | 0     | 0     | 0     | 0     | 0     | 0     | 0     | 0     | 0     |
| 0.02  | 0.02  | 0.02  | 0.01  | 0.02  | 0.01  | 0.02  | 0     | 0     | 0     | 0     | 0     | 0     | 0     | 0.01  | 0     | 0     | 0     | 0     | 0     | 0     |
| 0     | 0     | 0     | 0     | 0     | 0     | 0     | 0     | 0     | 0     | 0     | 0     | 0     | 0     | 0     | 0     | 0     | 0     | 0     | 0     | 0     |
| 0     | 0     | 0     | 0     | 0     | 0     | 0     | 0     | 0     | 0     | 0     | 0     | 0     | 0     | 0     | 0     | 0     | 0     | 0     | 0     | 0     |
| 0     | 0     | 0     | 0     | 0     | 0     | 0     | 0     | 0     | 0     | 0     | 0     | 0     | 0     | 0     | 0     | 0     | 0     | 0     | 0     | 0     |
| 0     | 0     | 0     | 0     | 0     | 0     | 0     | 0.01  | 0.01  | 0     | 0     | 0     | 0     | 0.01  | 0.01  | 0.01  | 0.01  | 0.01  | 0     | 0.01  | 0.01  |
| 0     | 0     | 0     | 0     | 0     | 0     | 0     | 0     | 0     | 0     | 0     | 0     | 0     | 0     | 0     | 0     | 0     | 0     | 0     | 0     | 0     |
| 0     | 0     | 0     | 0     | 0     | 0     | 0     | 0     | 0     | 0     | 0     | 0     | 0     | 0     | 0     | 0     | 0     | 0     | 0     | 0     | 0     |
| 0     | 0     | 0     | 0     | 0     | 0     | 0     | 0     | 0     | 0     | 0     | 0     | 0     | 0     | 0     | 0     | 0     | 0     | 0     | 0     | 0     |
| 0     | 0     | 0     | 0     | 0     | 0     | 0     | 0     | 0     | 0     | 0     | 0     | 0     | 0     | 0     | 0     | 0     | 0     | 0     | 0     | 0     |
| 0     | 0     | 0     | 0     | 0     | 0     | 0     | 0     | 0     | 0     | 0     | 0     | 0     | 0     | 0     | 0     | 0     | 0     | 0     | 0     | 0     |
| 0     | 0     | 0     | 0     | 0     | 0     | 0     | 0     | 0     | 0     | 0     | 0     | 0     | 0     | 0     | 0     | 0     | 0     | 0     | 0     | 0     |
| 0     | 0     | 0     | 0     | 0     | 0     | 0     | 0     | 0     | 0     | 0     | 0     | 0     | 0     | 0     | 0     | 0     | 0     | 0     | 0     | 0     |
| 0     | 0     | 0     | 0     | 0     | 0     | 0     | 0     | 0     | 0     | 0     | 0     | 0     | 0     | 0     | 0     | 0     | 0     | 0     | 0     | 0     |
| 0     | 0     | 0     | 0     | 0     | 0     | 0     | 0     | 0     | 0     | 0     | 0     | 0     | 0     | 0     | 0     | 0     | 0     | 0     | 0     | 0     |
| 0     | 0     | 0     | 0     | 0     | 0     | 0     | 0     | 0     | 0     | 0     | 0     | 0     | 0     | 0     | 0     | 0     | 0     | 0     | 0     | 0     |
| 0     | 0     | 0     | 0     | 0     | 0     | 0     | 0     | 0     | 0     | 0     | 0     | 0     | 0     | 0     | 0     | 0     | 0     | 0     | 0     | 0     |
| 0     | 0     | 0     | 0     | 0     | 0     | 0     | 0     | 0     | 0     | 0.01  | 0.02  | 0.01  | 0     | 0.05  | 0     | 0     | 0     | 0     | 0     | 0.01  |
| 0     | 0     | 0     | 0     | 0     | 0     | 0     | 0     | 0     | 0     | 0     | 0     | 0     | 0     | 0     | 0     | 0.01  | 0     | 0     | 0     | 0.01  |

Feuille1

|      |      |      |      |      |      |      |      |      |      |      |      |      |      |      |      |      |      |      |      |      |      |
|------|------|------|------|------|------|------|------|------|------|------|------|------|------|------|------|------|------|------|------|------|------|
| 0    | 0    | 0    | 0    | 0    | 0    | 0    | 0    | 0    | 0    | 0    | 0    | 0    | 0    | 0    | 0    | 0    | 0    | 0    | 0    | 0    | 0    |
| 0    | 0    | 0    | 0    | 0    | 0    | 0    | 0    | 0    | 0    | 0    | 0    | 0    | 0    | 0    | 0    | 0    | 0    | 0    | 0    | 0    | 0    |
| 0    | 0    | 0    | 0    | 0    | 0    | 0    | 0    | 0    | 0    | 0    | 0    | 0    | 0    | 0    | 0    | 0    | 0    | 0    | 0    | 0    | 0    |
| 0    | 0    | 0    | 0    | 0    | 0    | 0    | 0    | 0    | 0    | 0    | 0    | 0    | 0    | 0    | 0    | 0    | 0    | 0    | 0    | 0    | 0    |
| 0    | 0    | 0    | 0    | 0    | 0    | 0    | 0    | 0    | 0    | 0    | 0    | 0    | 0    | 0    | 0    | 0    | 0    | 0    | 0    | 0    | 0    |
| 0    | 0    | 0    | 0    | 0    | 0    | 0    | 0    | 0    | 0    | 0    | 0.01 | 0    | 0    | 0    | 0    | 0    | 0    | 0    | 0    | 0.01 | 0    |
| 0    | 0    | 0    | 0    | 0    | 0    | 0    | 0    | 0    | 0    | 0    | 0    | 0    | 0    | 0    | 0    | 0    | 0    | 0    | 0    | 0    | 0    |
| 0    | 0    | 0    | 0    | 0    | 0    | 0    | 0    | 0    | 0    | 0    | 0    | 0    | 0    | 0    | 0    | 0    | 0    | 0    | 0    | 0    | 0    |
| 0    | 0    | 0    | 0    | 0    | 0    | 0    | 0    | 0    | 0    | 0    | 0    | 0    | 0    | 0    | 0    | 0    | 0    | 0    | 0    | 0    | 0    |
| 0    | 0    | 0    | 0    | 0    | 0    | 0    | 0    | 0    | 0    | 0    | 0    | 0    | 0    | 0    | 0    | 0    | 0    | 0    | 0    | 0    | 0    |
| 0    | 0    | 0    | 0    | 0    | 0    | 0    | 0    | 0    | 0    | 0    | 0    | 0    | 0    | 0    | 0    | 0    | 0    | 0    | 0    | 0    | 0.01 |
| 0.01 | 0.02 | 0.01 | 0.02 | 0.01 | 0.01 | 0.01 | 0    | 0    | 0    | 0    | 0    | 0    | 0    | 0    | 0    | 0    | 0    | 0.01 | 0    | 0.02 | 0.02 |
| 0    | 0    | 0    | 0    | 0    | 0    | 0    | 0    | 0    | 0.08 | 0.06 | 0.07 | 0.13 | 0.29 | 0.06 | 0    | 0    | 0    | 0    | 0    | 0    | 0    |
| 0.19 | 0.19 | 0.27 | 0.14 | 0.25 | 0.22 | 0.23 | 0.04 | 0.15 | 0    | 0    | 0    | 0    | 0    | 0    | 0.21 | 0.23 | 0.11 | 0.19 | 0.02 | 0.02 |      |
| 0.14 | 0.12 | 0.16 | 0.28 | 0.15 | 0.13 | 0.11 | 0.03 | 0.06 | 0    | 0    | 0    | 0    | 0    | 0    | 0.06 | 0.08 | 0.05 | 0.06 | 0.15 | 0.14 |      |
| 0    | 0    | 0    | 0    | 0    | 0    | 0    | 0    | 0    | 0    | 0    | 0    | 0    | 0    | 0    | 0    | 0    | 0    | 0    | 0    | 0    | 0    |
| 0    | 0    | 0    | 0    | 0    | 0    | 0    | 0    | 0    | 0    | 0    | 0    | 0    | 0    | 0    | 0    | 0    | 0    | 0    | 0.01 | 0    | 0    |
| 0    | 0    | 0    | 0    | 0    | 0    | 0    | 0    | 0    | 0    | 0    | 0    | 0    | 0    | 0    | 0    | 0    | 0    | 0    | 0    | 0    | 0    |
| 0    | 0    | 0.02 | 0.01 | 0    | 0.01 | 0    | 0    | 0    | 0    | 0    | 0    | 0    | 0    | 0    | 0    | 0.09 | 0.03 | 0.04 | 0.03 | 0.01 | 0.01 |
| 0    | 0    | 0    | 0    | 0    | 0    | 0    | 0    | 0    | 0    | 0    | 0    | 0    | 0    | 0    | 0    | 0    | 0    | 0    | 0    | 0    | 0    |
| 0    | 0    | 0    | 0    | 0    | 0    | 0    | 0    | 0    | 0    | 0    | 0    | 0    | 0    | 0    | 0    | 0    | 0    | 0    | 0    | 0    | 0    |
| 0    | 0    | 0    | 0    | 0    | 0    | 0    | 0    | 0    | 0    | 0    | 0    | 0    | 0    | 0    | 0    | 0    | 0    | 0    | 0    | 0    | 0    |
| 0    | 0    | 0    | 0    | 0    | 0    | 0    | 0    | 0    | 0    | 0    | 0    | 0    | 0    | 0    | 0    | 0    | 0    | 0    | 0    | 0    | 0    |
| 0    | 0    | 0    | 0    | 0    | 0    | 0    | 0    | 0    | 0    | 0    | 0    | 0    | 0    | 0    | 0    | 0    | 0    | 0    | 0    | 0    | 0    |
| 0    | 0    | 0    | 0    | 0    | 0    | 0    | 0    | 0    | 0    | 0    | 0    | 0    | 0    | 0    | 0    | 0    | 0    | 0    | 0    | 0    | 0    |
| 0    | 0    | 0    | 0    | 0    | 0    | 0    | 0    | 0    | 0    | 0    | 0    | 0    | 0    | 0    | 0    | 0    | 0    | 0    | 0    | 0    | 0    |
| 0    | 0    | 0    | 0    | 0    | 0    | 0    | 0    | 0    | 0    | 0    | 0    | 0    | 0    | 0    | 0    | 0    | 0    | 0    | 0    | 0    | 0    |
| 0    | 0    | 0    | 0    | 0    | 0    | 0    | 0    | 0    | 0    | 0    | 0    | 0    | 0    | 0    | 0    | 0    | 0    | 0    | 0    | 0    | 0    |
| 0    | 0    | 0    | 0    | 0    | 0    | 0    | 0    | 0    | 0    | 0    | 0    | 0    | 0    | 0    | 0    | 0    | 0    | 0    | 0    | 0    | 0    |
| 0    | 0    | 0    | 0    | 0    | 0    | 0    | 0    | 0    | 0    | 0    | 0    | 0    | 0    | 0    | 0    | 0    | 0    | 0    | 0    | 0    | 0    |
| 0.01 | 0.03 | 0.02 | 0.01 | 0.01 | 0.02 | 0.01 | 0    | 0    | 0    | 0    | 0    | 0    | 0    | 0    | 0    | 0.04 | 0.02 | 0    | 0.05 | 0    | 0    |
| 0.02 | 0.03 | 0.02 | 0.03 | 0.01 | 0.06 | 0.01 | 0.03 | 0.03 | 0.01 | 0.01 | 0.06 | 0.03 | 0.03 | 0.07 | 0.03 | 0.02 | 0.03 | 0.01 | 0.02 | 0.02 | 0.07 |
| 0    | 0    | 0    | 0    | 0    | 0    | 0    | 0    | 0.01 | 0    | 0    | 0    | 0    | 0    | 0.01 | 0    | 0.01 | 0.01 | 0.01 | 0    | 0    | 0    |





Feuille1

|      |      |      |      |      |      |      |      |      |      |      |      |      |      |      |      |      |      |      |      |      |      |
|------|------|------|------|------|------|------|------|------|------|------|------|------|------|------|------|------|------|------|------|------|------|
| 0    | 0    | 0    | 0    | 0    | 0    | 0    | 0    | 0    | 0.01 | 0    | 0    | 0    | 0    | 0    | 0    | 0    | 0    | 0    | 0    | 0    |      |
| 0    | 0    | 0    | 0    | 0    | 0    | 0    | 0    | 0    | 0.2  | 0.39 | 0.02 | 0.03 | 0.04 | 0.03 | 0    | 0    | 0    | 0    | 0    | 0    |      |
| 0    | 0    | 0    | 0    | 0    | 0    | 0    | 0    | 0    | 0    | 0    | 0    | 0    | 0    | 0    | 0    | 0    | 0    | 0    | 0    | 0    |      |
| 0    | 0    | 0    | 0    | 0    | 0    | 0    | 0    | 0    | 0    | 0    | 0    | 0    | 0.01 | 0.01 | 0    | 0    | 0    | 0    | 0    | 0    |      |
| 0    | 0    | 0    | 0    | 0    | 0    | 0    | 0    | 0    | 0    | 0    | 0    | 0    | 0    | 0    | 0    | 0    | 0    | 0    | 0    | 0    |      |
| 0    | 0    | 0    | 0    | 0    | 0    | 0    | 0    | 0    | 0    | 0    | 0    | 0.05 | 0    | 0.01 | 0    | 0    | 0    | 0    | 0    | 0    |      |
| 0    | 0    | 0    | 0    | 0    | 0    | 0    | 0    | 0    | 0    | 0    | 0    | 0    | 0    | 0    | 0    | 0    | 0    | 0    | 0    | 0    |      |
| 0    | 0    | 0    | 0    | 0    | 0    | 0    | 0    | 0    | 0    | 0    | 0    | 0    | 0    | 0    | 0    | 0    | 0    | 0    | 0    | 0    |      |
| 0    | 0    | 0    | 0    | 0    | 0    | 0    | 0    | 0    | 0    | 0    | 0    | 0    | 0    | 0    | 0    | 0    | 0    | 0    | 0    | 0    |      |
| 0    | 0    | 0    | 0    | 0    | 0    | 0    | 0    | 0.02 | 0.01 | 0    | 0    | 0.01 | 0    | 0.01 | 0    | 0.05 | 0.03 | 0.04 | 0.02 | 0.01 | 0.01 |
| 0    | 0    | 0    | 0    | 0    | 0    | 0    | 0    | 0    | 0    | 0    | 0    | 0    | 0    | 0    | 0    | 0    | 0    | 0    | 0    | 0    |      |
| 0.03 | 0.05 | 0.06 | 0.04 | 0.02 | 0.06 | 0.06 | 0.24 | 0.21 | 0.07 | 0.01 | 0.14 | 0.08 | 0.08 | 0.02 | 0.04 | 0.01 | 0.02 | 0.07 | 0.21 | 0.08 |      |
| 0    | 0    | 0    | 0    | 0    | 0    | 0    | 0.01 | 0    | 0    | 0    | 0    | 0    | 0    | 0    | 0.01 | 0.01 | 0    | 0    | 0    | 0    |      |
| 0    | 0    | 0    | 0    | 0    | 0    | 0    | 0    | 0    | 0    | 0    | 0    | 0    | 0    | 0    | 0    | 0    | 0    | 0    | 0    | 0    |      |
| 0    | 0    | 0    | 0    | 0    | 0    | 0    | 0    | 0    | 0    | 0    | 0    | 0    | 0    | 0    | 0    | 0    | 0    | 0    | 0    | 0    |      |
| 0    | 0    | 0    | 0    | 0    | 0    | 0    | 0    | 0    | 0    | 0    | 0    | 0    | 0    | 0    | 0    | 0    | 0    | 0    | 0    | 0    |      |
| 0    | 0    | 0    | 0    | 0    | 0    | 0    | 0    | 0    | 0    | 0    | 0    | 0    | 0    | 0    | 0    | 0    | 0    | 0    | 0    | 0    |      |
| 0    | 0    | 0    | 0    | 0    | 0    | 0    | 0    | 0    | 0    | 0    | 0    | 0    | 0    | 0    | 0    | 0    | 0    | 0    | 0    | 0    |      |
| 0    | 0    | 0    | 0    | 0    | 0    | 0    | 0    | 0    | 0    | 0    | 0    | 0    | 0    | 0    | 0    | 0    | 0    | 0    | 0    | 0    |      |
| 0    | 0    | 0    | 0    | 0    | 0    | 0    | 0    | 0    | 0    | 0    | 0    | 0    | 0    | 0    | 0    | 0    | 0    | 0    | 0    | 0    |      |
| 0    | 0    | 0    | 0    | 0    | 0    | 0    | 0    | 0    | 0    | 0    | 0    | 0    | 0    | 0    | 0    | 0    | 0    | 0    | 0    | 0    |      |
| 0    | 0    | 0    | 0    | 0    | 0    | 0    | 0    | 0    | 0    | 0    | 0    | 0    | 0    | 0    | 0    | 0    | 0    | 0    | 0    | 0    |      |
| 0    | 0    | 0    | 0    | 0    | 0    | 0    | 0    | 0    | 0    | 0    | 0    | 0    | 0    | 0    | 0    | 0    | 0    | 0    | 0    | 0    |      |
| 0    | 0    | 0    | 0    | 0    | 0    | 0    | 0    | 0    | 0    | 0    | 0    | 0    | 0    | 0    | 0    | 0    | 0    | 0    | 0    | 0    |      |
| 0    | 0    | 0    | 0    | 0    | 0    | 0    | 0    | 0    | 0    | 0    | 0    | 0    | 0    | 0    | 0    | 0    | 0    | 0    | 0    | 0    |      |
| 0    | 0    | 0    | 0    | 0    | 0    | 0    | 0    | 0    | 0    | 0    | 0    | 0    | 0    | 0    | 0    | 0    | 0    | 0    | 0    | 0    |      |
| 0    | 0    | 0    | 0    | 0    | 0    | 0    | 0    | 0    | 0    | 0    | 0    | 0    | 0    | 0    | 0    | 0    | 0    | 0    | 0    | 0    |      |
| 0    | 0    | 0    | 0    | 0    | 0    | 0    | 0    | 0    | 0    | 0    | 0    | 0    | 0    | 0    | 0    | 0    | 0    | 0    | 0    | 0    |      |
| 0    | 0    | 0    | 0    | 0    | 0    | 0    | 0    | 0    | 0    | 0    | 0    | 0    | 0    | 0    | 0    | 0    | 0    | 0    | 0    | 0    |      |
| 0    | 0    | 0    | 0    | 0    | 0    | 0    | 0    | 0    | 0    | 0    | 0    | 0    | 0    | 0    | 0    | 0    | 0    | 0    | 0    | 0    |      |
| 0    | 0    | 0    | 0    | 0    | 0    | 0    | 0    | 0    | 0    | 0    | 0    | 0    | 0    | 0    | 0    | 0    | 0    | 0    | 0    | 0    |      |
| 0    | 0    | 0    | 0    | 0    | 0    | 0    | 0    | 0    | 0    | 0.01 | 0.03 | 0.01 | 0.02 | 0    | 0    | 0    | 0    | 0    | 0    | 0.01 |      |
| 0    | 0    | 0    | 0    | 0    | 0    | 0    | 0    | 0    | 0    | 0.02 | 0.02 | 0    | 0    | 0    | 0.01 | 0    | 0    | 0    | 0    | 0.01 | 0.01 |
| 0    | 0    | 0.01 | 0.01 | 0    | 0    | 0    | 0    | 0    | 0    | 0    | 0    | 0.03 | 0.06 | 0.02 | 0.03 | 0    | 0    | 0    | 0    | 0.01 | 0.02 |
| 0    | 0    | 0    | 0    | 0    | 0    | 0    | 0.01 | 0    | 0    | 0    | 0    | 0    | 0    | 0    | 0    | 0.01 | 0    | 0.01 | 0.01 | 0.01 | 0    |
| 0.06 | 0.08 | 0.05 | 0.05 | 0.05 | 0.05 | 0.05 | 0    | 0    | 0.01 | 0.02 | 0    | 0.01 | 0    | 0.01 | 0.01 | 0.01 | 0.02 | 0    | 0.03 | 0.01 |      |

Feuille1

|      |      |      |      |      |      |      |      |      |      |      |      |      |      |      |      |      |      |      |      |      |
|------|------|------|------|------|------|------|------|------|------|------|------|------|------|------|------|------|------|------|------|------|
| 0.02 | 0.03 | 0.01 | 0.01 | 0.02 | 0.02 | 0.02 | 0    | 0    | 0    | 0    | 0    | 0.01 | 0    | 0    | 0    | 0.01 | 0.01 | 0.01 | 0.01 | 0.01 |
| 0.01 | 0    | 0.01 | 0.01 | 0    | 0    | 0    | 0    | 0    | 0.04 | 0.07 | 0.06 | 0.1  | 0.02 | 0.02 | 0    | 0    | 0.01 | 0.02 | 0.01 | 0.01 |
| 0    | 0    | 0    | 0    | 0    | 0    | 0    | 0    | 0    | 0.01 | 0.03 | 0.01 | 0.01 | 0.01 | 0.01 | 0    | 0    | 0    | 0    | 0.01 | 0.01 |
| 0    | 0    | 0    | 0    | 0    | 0    | 0    | 0    | 0    | 0    | 0    | 0    | 0    | 0    | 0    | 0    | 0    | 0    | 0    | 0    | 0    |
| 0.01 | 0    | 0.01 | 0.01 | 0.01 | 0    | 0.01 | 0    | 0    | 0    | 0    | 0    | 0    | 0    | 0    | 0    | 0    | 0    | 0    | 0    | 0.01 |
| 0    | 0    | 0    | 0    | 0    | 0    | 0    | 0    | 0    | 0    | 0    | 0    | 0    | 0    | 0    | 0    | 0    | 0    | 0    | 0    | 0    |
| 0    | 0    | 0    | 0    | 0    | 0    | 0    | 0    | 0    | 0    | 0    | 0    | 0    | 0    | 0    | 0    | 0    | 0    | 0    | 0    | 0    |
| 0    | 0    | 0    | 0    | 0    | 0    | 0    | 0    | 0    | 0    | 0    | 0    | 0    | 0    | 0    | 0    | 0    | 0    | 0    | 0    | 0    |
| 0    | 0    | 0    | 0    | 0    | 0    | 0    | 0    | 0    | 0    | 0    | 0    | 0    | 0    | 0    | 0    | 0    | 0    | 0    | 0    | 0    |
| 0    | 0    | 0    | 0    | 0    | 0    | 0    | 0    | 0    | 0    | 0    | 0    | 0    | 0    | 0    | 0    | 0    | 0    | 0    | 0    | 0    |
| 0.04 | 0.03 | 0.02 | 0.04 | 0.03 | 0.02 | 0.03 | 0.02 | 0.03 | 0    | 0    | 0.01 | 0.03 | 0    | 0    | 0.01 | 0.01 | 0    | 0.02 | 0.02 | 0.01 |
| 0.13 | 0.12 | 0.05 | 0.04 | 0.11 | 0.07 | 0.12 | 0.03 | 0.08 | 0.01 | 0    | 0.05 | 0.03 | 0.01 | 0.06 | 0.01 | 0.01 | 0    | 0.01 | 0.03 | 0.05 |
| 0.02 | 0.01 | 0    | 0    | 0.01 | 0    | 0.01 | 0    | 0    | 0    | 0    | 0    | 0    | 0    | 0.01 | 0    | 0    | 0    | 0.01 | 0    | 0    |
| 0    | 0    | 0    | 0    | 0    | 0    | 0    | 0    | 0    | 0    | 0    | 0    | 0    | 0    | 0    | 0    | 0    | 0    | 0    | 0    | 0    |
| 0    | 0    | 0    | 0    | 0    | 0    | 0    | 0    | 0    | 0    | 0    | 0    | 0    | 0    | 0    | 0    | 0.01 | 0    | 0    | 0    | 0    |
| 0    | 0    | 0    | 0    | 0    | 0    | 0    | 0    | 0    | 0    | 0    | 0    | 0    | 0    | 0.01 | 0    | 0    | 0    | 0    | 0    | 0    |
| 0    | 0    | 0    | 0    | 0    | 0    | 0    | 0    | 0    | 0    | 0    | 0    | 0    | 0    | 0    | 0    | 0    | 0    | 0    | 0    | 0    |
| 0    | 0    | 0    | 0    | 0    | 0    | 0    | 0    | 0    | 0    | 0    | 0    | 0    | 0    | 0    | 0    | 0    | 0    | 0    | 0    | 0    |
| 0    | 0    | 0    | 0    | 0    | 0    | 0    | 0    | 0    | 0    | 0    | 0    | 0    | 0    | 0    | 0    | 0    | 0    | 0    | 0    | 0    |
| 0    | 0    | 0    | 0    | 0    | 0    | 0    | 0    | 0    | 0    | 0    | 0    | 0    | 0    | 0    | 0    | 0    | 0    | 0    | 0    | 0    |
| 0    | 0    | 0    | 0    | 0    | 0    | 0    | 0    | 0    | 0    | 0    | 0    | 0    | 0    | 0    | 0    | 0    | 0    | 0    | 0    | 0    |
| 0    | 0    | 0    | 0    | 0    | 0    | 0    | 0    | 0    | 0.01 | 0    | 0.04 | 0.01 | 0    | 0    | 0    | 0    | 0    | 0    | 0    | 0    |
| 0    | 0    | 0    | 0    | 0    | 0    | 0    | 0    | 0    | 0    | 0    | 0    | 0    | 0    | 0    | 0    | 0    | 0    | 0.01 | 0    | 0    |
| 0.01 | 0    | 0    | 0    | 0    | 0    | 0    | 0    | 0    | 0    | 0    | 0    | 0    | 0    | 0    | 0.01 | 0    | 0    | 0    | 0    | 0    |
| 0.01 | 0.02 | 0.01 | 0.01 | 0.02 | 0.02 | 0.01 | 0.01 | 0    | 0    | 0    | 0    | 0.01 | 0.02 | 0.01 | 0.01 | 0.01 | 0.01 | 0.01 | 0.01 | 0.02 |
| 0.03 | 0.03 | 0.04 | 0.02 | 0.05 | 0.02 | 0.03 | 0    | 0    | 0    | 0.01 | 0.01 | 0.02 | 0.02 | 0.01 | 0.01 | 0    | 0    | 0.01 | 0    | 0.02 |
| 0    | 0    | 0    | 0    | 0    | 0    | 0    | 0    | 0    | 0    | 0    | 0    | 0.01 | 0    | 0    | 0    | 0    | 0    | 0    | 0    | 0    |
| 0    | 0    | 0.01 | 0.01 | 0    | 0    | 0.01 | 0    | 0.01 | 0.01 | 0    | 0    | 0.01 | 0.02 | 0.04 | 0    | 0    | 0    | 0.01 | 0.02 | 0.02 |
| 0    | 0    | 0    | 0    | 0    | 0    | 0    | 0    | 0    | 0.01 | 0    | 0    | 0    | 0    | 0    | 0    | 0    | 0    | 0    | 0    | 0.01 |
| 0    | 0    | 0    | 0    | 0    | 0    | 0    | 0    | 0    | 0    | 0    | 0    | 0    | 0    | 0    | 0    | 0    | 0    | 0    | 0    | 0    |
| 0    | 0    | 0    | 0    | 0    | 0    | 0    | 0    | 0    | 0    | 0    | 0    | 0    | 0    | 0    | 0    | 0    | 0    | 0    | 0    | 0    |
| 0    | 0    | 0    | 0    | 0    | 0    | 0    | 0    | 0    | 0    | 0    | 0    | 0    | 0    | 0    | 0    | 0    | 0    | 0    | 0    | 0    |
| 0    | 0    | 0    | 0    | 0    | 0    | 0    | 0    | 0    | 0    | 0    | 0    | 0    | 0    | 0    | 0    | 0    | 0    | 0    | 0    | 0    |
| 0    | 0    | 0    | 0    | 0    | 0    | 0    | 0    | 0    | 0    | 0    | 0    | 0    | 0    | 0    | 0    | 0    | 0    | 0    | 0    | 0    |
| 0    | 0    | 0    | 0    | 0    | 0    | 0    | 0    | 0    | 0    | 0    | 0    | 0    | 0    | 0    | 0    | 0    | 0    | 0    | 0    | 0    |
| 0    | 0    | 0    | 0    | 0    | 0    | 0    | 0    | 0    | 0    | 0    | 0    | 0    | 0    | 0    | 0    | 0    | 0    | 0    | 0    | 0    |
| 0    | 0    | 0    | 0    | 0    | 0    | 0    | 0    | 0    | 0    | 0    | 0    | 0    | 0    | 0    | 0    | 0    | 0    | 0    | 0    | 0    |





















Feuille1

|   |   |   |   |   |   |   |      |      |      |      |      |      |      |      |      |      |      |      |      |      |
|---|---|---|---|---|---|---|------|------|------|------|------|------|------|------|------|------|------|------|------|------|
| 0 | 0 | 0 | 0 | 0 | 0 | 0 | 0    | 0    | 0    | 0    | 0    | 0    | 0    | 0    | 0    | 0    | 0    | 0    | 0    | 0    |
| 0 | 0 | 0 | 0 | 0 | 0 | 0 | 0    | 0    | 0    | 0    | 0    | 0    | 0    | 0    | 0    | 0    | 0    | 0    | 0    | 0    |
| 0 | 0 | 0 | 0 | 0 | 0 | 0 | 0    | 0    | 0    | 0    | 0    | 0    | 0    | 0    | 0    | 0    | 0    | 0    | 0    | 0    |
| 0 | 0 | 0 | 0 | 0 | 0 | 0 | 0    | 0    | 0    | 0    | 0    | 0    | 0    | 0    | 0    | 0    | 0    | 0    | 0    | 0    |
| 0 | 0 | 0 | 0 | 0 | 0 | 0 | 0    | 0.01 | 0    | 0    | 0.01 | 0    | 0    | 0    | 0    | 0    | 0    | 0    | 0    | 0    |
| 0 | 0 | 0 | 0 | 0 | 0 | 0 | 0    | 0    | 0    | 0    | 0    | 0.01 | 0    | 0    | 0.01 | 0.02 | 0.14 | 0.03 | 0.01 | 0    |
| 0 | 0 | 0 | 0 | 0 | 0 | 0 | 0    | 0    | 0.01 | 0    | 0    | 0    | 0    | 0    | 0    | 0    | 0    | 0    | 0    | 0    |
| 0 | 0 | 0 | 0 | 0 | 0 | 0 | 0.03 | 0.01 | 0.03 | 0.01 | 0    | 0.01 | 0.02 | 0    | 0.01 | 0.01 | 0    | 0.01 | 0.01 | 0    |
| 0 | 0 | 0 | 0 | 0 | 0 | 0 | 0    | 0    | 0    | 0    | 0    | 0    | 0    | 0    | 0    | 0    | 0    | 0    | 0    | 0    |
| 0 | 0 | 0 | 0 | 0 | 0 | 0 | 0    | 0    | 0    | 0    | 0.03 | 0.01 | 0.01 | 0.01 | 0    | 0.01 | 0    | 0    | 0    | 0    |
| 0 | 0 | 0 | 0 | 0 | 0 | 0 | 0    | 0    | 0    | 0    | 0    | 0    | 0    | 0    | 0    | 0    | 0    | 0    | 0    | 0    |
| 0 | 0 | 0 | 0 | 0 | 0 | 0 | 0.01 | 0    | 0    | 0    | 0.01 | 0    | 0.01 | 0    | 0    | 0    | 0    | 0    | 0    | 0    |
| 0 | 0 | 0 | 0 | 0 | 0 | 0 | 0    | 0    | 0.01 | 0    | 0.01 | 0.01 | 0.01 | 0.01 | 0    | 0    | 0    | 0    | 0.01 | 0.01 |

Feuille1

| miR_BumiR_BumiR_CemiR_CemiR_CemiR_CemiR_CemiR_CemiR_CemiR_D(miR_D(miR_DemiR_DlmiR_DlmiR_DlmiR_DlmiR_DlmiR_DlmiR_Er |      |      |      |      |      |      |      |      |      |      |      |      |      |      |      |      |      |      |      |      |
|--------------------------------------------------------------------------------------------------------------------|------|------|------|------|------|------|------|------|------|------|------|------|------|------|------|------|------|------|------|------|
| 0.01                                                                                                               | 0.03 | 0.08 | 0.02 | 0.09 | 0.22 | 0.19 | 0.08 | 0.05 | 0.03 | 0.02 | 0.02 | 0.07 | 0.02 | 0.03 | 0.03 | 0.03 | 0.02 | 0    | 0.02 | 0.06 |
| 0.03                                                                                                               | 0    | 0.06 | 0.03 | 0.06 | 0.11 | 0.13 | 0.02 | 0.02 | 0.01 | 0.01 | 0.01 | 0.02 | 0.01 | 0.02 | 0.01 | 0.01 | 0.02 | 0    | 0.01 | 0.07 |
| 0.02                                                                                                               | 0    | 0.01 | 0.01 | 0.02 | 0.01 | 0.01 | 0.02 | 0.02 | 0.01 | 0    | 0    | 0    | 0    | 0    | 0    | 0    | 0    | 0    | 0    | 0.03 |
| 0                                                                                                                  | 0.01 | 0    | 0    | 0.01 | 0.04 | 0.06 | 0.01 | 0.01 | 0    | 0    | 0    | 0    | 0.01 | 0    | 0    | 0    | 0    | 0    | 0    | 0    |
| 0                                                                                                                  | 0    | 0.01 | 0    | 0    | 0.02 | 0.02 | 0    | 0    | 0.01 | 0    | 0    | 0.01 | 0    | 0    | 0    | 0    | 0    | 0    | 0    | 0    |
| 0                                                                                                                  | 0.05 | 0.01 | 0.02 | 0.1  | 0.02 | 0.03 | 0.14 | 0.11 | 0.03 | 0.01 | 0.02 | 0.02 | 0.01 | 0.01 | 0.01 | 0.01 | 0.02 | 0    | 0.02 | 0.01 |
| 0                                                                                                                  | 0.01 | 0    | 0    | 0.01 | 0    | 0    | 0.01 | 0.01 | 0    | 0    | 0.01 | 0    | 0    | 0    | 0    | 0    | 0    | 0.01 | 0    | 0.01 |
| 0                                                                                                                  | 0    | 0.01 | 0.01 | 0.02 | 0    | 0    | 0.02 | 0.02 | 0.01 | 0.01 | 0.01 | 0    | 0    | 0    | 0    | 0    | 0    | 0    | 0    | 0.01 |
| 0                                                                                                                  | 0    | 0    | 0    | 0    | 0    | 0    | 0    | 0    | 0    | 0    | 0    | 0    | 0    | 0    | 0    | 0    | 0    | 0    | 0    | 0    |
| 0                                                                                                                  | 0    | 0    | 0    | 0    | 0    | 0    | 0    | 0    | 0    | 0    | 0    | 0.01 | 0    | 0    | 0    | 0    | 0    | 0    | 0    | 0    |
| 0                                                                                                                  | 0    | 0    | 0    | 0    | 0    | 0    | 0    | 0    | 0    | 0    | 0    | 0    | 0    | 0    | 0    | 0    | 0    | 0    | 0    | 0    |
| 0                                                                                                                  | 0.01 | 0    | 0    | 0    | 0    | 0    | 0    | 0    | 0.01 | 0    | 0    | 0    | 0    | 0    | 0    | 0    | 0    | 0    | 0    | 0    |
| 0                                                                                                                  | 0    | 0.01 | 0    | 0    | 0    | 0    | 0    | 0    | 0    | 0    | 0    | 0    | 0    | 0    | 0    | 0    | 0.01 | 0    | 0    | 0    |
| 0                                                                                                                  | 0    | 0    | 0    | 0    | 0    | 0.01 | 0    | 0    | 0    | 0    | 0    | 0    | 0    | 0    | 0    | 0    | 0    | 0    | 0    | 0    |
| 0                                                                                                                  | 0    | 0    | 0    | 0    | 0    | 0    | 0    | 0    | 0    | 0    | 0    | 0    | 0    | 0    | 0    | 0    | 0    | 0    | 0    | 0    |
| 0                                                                                                                  | 0.01 | 0    | 0.01 | 0.01 | 0.02 | 0    | 0.01 | 0.01 | 0.01 | 0    | 0    | 0.02 | 0    | 0    | 0    | 0    | 0    | 0.01 | 0    | 0    |
| 0                                                                                                                  | 0    | 0    | 0    | 0    | 0    | 0    | 0    | 0    | 0    | 0    | 0    | 0    | 0    | 0    | 0    | 0    | 0    | 0    | 0    | 0    |
| 0                                                                                                                  | 0    | 0    | 0    | 0    | 0    | 0    | 0    | 0    | 0    | 0    | 0    | 0    | 0    | 0    | 0    | 0    | 0    | 0    | 0    | 0.01 |
| 0                                                                                                                  | 0    | 0    | 0    | 0    | 0    | 0    | 0    | 0    | 0    | 0    | 0    | 0.03 | 0    | 0    | 0    | 0    | 0    | 0    | 0    | 0.01 |
| 0.04                                                                                                               | 0    | 0    | 0    | 0    | 0    | 0    | 0    | 0    | 0    | 0    | 0    | 0    | 0    | 0    | 0    | 0    | 0    | 0    | 0    | 0    |
| 0                                                                                                                  | 0    | 0.23 | 0    | 0    | 0    | 0    | 0    | 0    | 0    | 0    | 0    | 0    | 0    | 0    | 0    | 0    | 0    | 0    | 0    | 0    |
| 0                                                                                                                  | 0    | 0    | 0    | 0    | 0    | 0    | 0    | 0    | 0    | 0    | 0    | 0    | 0    | 0    | 0    | 0    | 0    | 0    | 0    | 0    |
| 0.01                                                                                                               | 0    | 0.01 | 0    | 0    | 0    | 0    | 0    | 0    | 0    | 0    | 0    | 0.01 | 0    | 0    | 0    | 0    | 0    | 0    | 0    | 0.01 |
| 0.03                                                                                                               | 0    | 0.02 | 0.01 | 0.01 | 0    | 0    | 0    | 0.01 | 0.01 | 0    | 0    | 0.01 | 0    | 0    | 0    | 0    | 0    | 0    | 0    | 0.04 |
| 0                                                                                                                  | 0    | 0.01 | 0    | 0.02 | 0    | 0    | 0.01 | 0    | 0    | 0    | 0    | 0.01 | 0.03 | 0.04 | 0.04 | 0    | 0.11 | 0    | 0    | 0.03 |
| 0                                                                                                                  | 0    | 0    | 0    | 0    | 0    | 0    | 0    | 0    | 0    | 0    | 0    | 0    | 0    | 0    | 0    | 0    | 0    | 0    | 0    | 0    |
| 0                                                                                                                  | 0    | 0    | 0    | 0    | 0    | 0    | 0    | 0    | 0    | 0    | 0    | 0    | 0    | 0    | 0    | 0    | 0    | 0    | 0    | 0    |
| 0                                                                                                                  | 0    | 0.01 | 0    | 0    | 0    | 0    | 0    | 0    | 0    | 0    | 0    | 0    | 0    | 0    | 0    | 0    | 0    | 0    | 0.01 | 0    |
| 0                                                                                                                  | 0    | 0.01 | 0    | 0    | 0    | 0    | 0    | 0    | 0    | 0    | 0    | 0    | 0    | 0    | 0    | 0    | 0    | 0    | 0.01 | 0    |
| 0                                                                                                                  | 0    | 0    | 0    | 0    | 0    | 0    | 0    | 0    | 0    | 0    | 0    | 0    | 0    | 0    | 0    | 0    | 0    | 0    | 0    | 0    |
| 0                                                                                                                  | 0    | 0    | 0    | 0    | 0    | 0    | 0    | 0    | 0    | 0    | 0    | 0    | 0    | 0    | 0    | 0    | 0    | 0    | 0    | 0    |
| 0                                                                                                                  | 0    | 0.01 | 0    | 0    | 0    | 0    | 0    | 0    | 0    | 0    | 0    | 0    | 0    | 0    | 0    | 0    | 0    | 0    | 0    | 0    |
| 0                                                                                                                  | 0    | 0    | 0    | 0    | 0    | 0    | 0    | 0    | 0    | 0    | 0    | 0    | 0    | 0    | 0    | 0    | 0    | 0    | 0    | 0    |
| 0.02                                                                                                               | 0    | 0    | 0    | 0    | 0.03 | 0    | 0    | 0    | 0    | 0    | 0    | 0.04 | 0    | 0    | 0    | 0    | 0.01 | 0    | 0    | 0    |
| 0                                                                                                                  | 0    | 0    | 0    | 0    | 0    | 0    | 0    | 0    | 0    | 0    | 0    | 0    | 0    | 0    | 0    | 0    | 0    | 0    | 0    | 0    |



Feuille1

|      |      |      |      |      |      |      |      |      |      |      |      |      |      |      |      |      |      |      |      |      |
|------|------|------|------|------|------|------|------|------|------|------|------|------|------|------|------|------|------|------|------|------|
| 0.16 | 0.1  | 0.05 | 0.12 | 0.1  | 0.07 | 0.03 | 0.07 | 0.06 | 0.06 | 0.07 | 0.12 | 0.09 | 0.11 | 0.09 | 0.1  | 0.18 | 0.07 | 0.05 | 0.14 | 0.05 |
| 0.01 | 0.01 | 0    | 0.03 | 0.03 | 0    | 0    | 0.01 | 0.01 | 0.02 | 0    | 0    | 0.01 | 0.01 | 0.01 | 0.01 | 0.01 | 0    | 0.07 | 0.01 | 0    |
| 0.01 | 0.01 | 0.03 | 0    | 0    | 0    | 0    | 0    | 0    | 0    | 0.01 | 0    | 0.01 | 0.01 | 0.02 | 0.01 | 0.02 | 0.03 | 0    | 0.01 | 0    |
| 0    | 0    | 0.01 | 0    | 0    | 0    | 0    | 0    | 0    | 0    | 0    | 0    | 0.02 | 0    | 0    | 0    | 0    | 0    | 0    | 0    | 0    |
| 0    | 0    | 0    | 0    | 0    | 0    | 0    | 0    | 0    | 0    | 0    | 0    | 0    | 0    | 0    | 0    | 0    | 0    | 0    | 0    | 0    |
| 0    | 0    | 0    | 0    | 0    | 0    | 0    | 0    | 0    | 0    | 0    | 0    | 0    | 0    | 0    | 0    | 0    | 0    | 0    | 0    | 0    |
| 0    | 0    | 0    | 0    | 0    | 0    | 0    | 0    | 0    | 0    | 0    | 0    | 0    | 0    | 0    | 0    | 0    | 0    | 0    | 0    | 0    |
| 0    | 0    | 0    | 0    | 0.01 | 0    | 0    | 0    | 0    | 0    | 0    | 0    | 0    | 0    | 0    | 0    | 0    | 0    | 0    | 0    | 0    |
| 0    | 0    | 0    | 0    | 0    | 0    | 0    | 0    | 0    | 0    | 0    | 0    | 0    | 0    | 0    | 0    | 0    | 0    | 0    | 0    | 0    |
| 0    | 0    | 0    | 0    | 0    | 0    | 0    | 0    | 0    | 0    | 0    | 0.01 | 0    | 0    | 0    | 0    | 0    | 0    | 0    | 0    | 0    |
| 0    | 0    | 0    | 0    | 0.01 | 0    | 0    | 0.01 | 0    | 0    | 0    | 0    | 0.01 | 0    | 0    | 0    | 0    | 0    | 0    | 0.01 | 0    |
| 0    | 0    | 0    | 0    | 0    | 0    | 0    | 0    | 0    | 0    | 0    | 0    | 0    | 0    | 0    | 0    | 0    | 0    | 0    | 0    | 0    |
| 0    | 0    | 0    | 0    | 0    | 0    | 0    | 0    | 0    | 0    | 0    | 0    | 0    | 0    | 0    | 0    | 0    | 0    | 0    | 0    | 0    |
| 0    | 0    | 0    | 0    | 0    | 0    | 0    | 0    | 0    | 0    | 0    | 0    | 0    | 0    | 0    | 0    | 0    | 0    | 0    | 0    | 0    |
| 0    | 0.01 | 0    | 0    | 0    | 0    | 0    | 0.01 | 0.01 | 0.01 | 0    | 0    | 0.01 | 0    | 0    | 0    | 0    | 0    | 0.02 | 0.01 | 0    |
| 0    | 0    | 0    | 0    | 0    | 0    | 0    | 0    | 0    | 0    | 0    | 0    | 0    | 0    | 0    | 0    | 0    | 0    | 0    | 0    | 0    |
| 0    | 0    | 0    | 0    | 0    | 0    | 0    | 0    | 0    | 0    | 0    | 0    | 0    | 0    | 0    | 0    | 0    | 0    | 0    | 0    | 0    |
| 0    | 0    | 0    | 0    | 0    | 0    | 0    | 0    | 0    | 0    | 0    | 0    | 0    | 0    | 0    | 0    | 0    | 0    | 0    | 0    | 0    |
| 0    | 0    | 0    | 0    | 0    | 0    | 0    | 0    | 0    | 0    | 0    | 0    | 0    | 0    | 0    | 0    | 0    | 0    | 0    | 0    | 0    |
| 0    | 0    | 0    | 0    | 0    | 0    | 0    | 0    | 0    | 0    | 0    | 0    | 0    | 0    | 0    | 0    | 0    | 0    | 0    | 0    | 0    |
| 0    | 0    | 0    | 0    | 0    | 0    | 0    | 0    | 0    | 0    | 0    | 0    | 0    | 0    | 0    | 0    | 0    | 0    | 0    | 0    | 0    |
| 0    | 0    | 0    | 0    | 0    | 0    | 0    | 0    | 0    | 0    | 0    | 0    | 0    | 0    | 0    | 0    | 0    | 0    | 0    | 0    | 0    |
| 0    | 0    | 0    | 0    | 0    | 0    | 0    | 0    | 0    | 0    | 0    | 0    | 0    | 0    | 0    | 0    | 0    | 0    | 0    | 0    | 0    |
| 0    | 0    | 0    | 0    | 0    | 0    | 0    | 0    | 0    | 0    | 0    | 0    | 0    | 0    | 0    | 0    | 0    | 0    | 0    | 0    | 0    |
| 0    | 0    | 0    | 0    | 0    | 0    | 0    | 0    | 0    | 0    | 0    | 0    | 0    | 0    | 0    | 0    | 0    | 0    | 0    | 0    | 0    |
| 0    | 0    | 0    | 0    | 0    | 0    | 0    | 0    | 0    | 0    | 0    | 0    | 0    | 0    | 0    | 0    | 0    | 0    | 0    | 0    | 0    |
| 0    | 0    | 0    | 0    | 0    | 0    | 0    | 0    | 0    | 0    | 0    | 0    | 0    | 0    | 0    | 0    | 0    | 0    | 0    | 0    | 0    |
| 0    | 0    | 0    | 0    | 0    | 0    | 0    | 0    | 0    | 0    | 0    | 0    | 0    | 0    | 0    | 0    | 0    | 0    | 0    | 0    | 0    |
| 0    | 0    | 0    | 0    | 0    | 0    | 0    | 0    | 0    | 0    | 0    | 0    | 0    | 0    | 0    | 0    | 0    | 0    | 0    | 0    | 0    |
| 0    | 0.01 | 0    | 0    | 0.01 | 0    | 0    | 0.01 | 0    | 0    | 0    | 0    | 0.02 | 0    | 0    | 0    | 0    | 0    | 0    | 0.01 | 0    |
| 0    | 0.03 | 0    | 0    | 0    | 0.01 | 0    | 0    | 0.03 | 0.01 | 0    | 0    | 0.02 | 0.01 | 0.01 | 0    | 0.01 | 0.01 | 0.01 | 0.01 | 0    |
| 0    | 0    | 0    | 0    | 0    | 0    | 0    | 0    | 0    | 0    | 0    | 0    | 0    | 0    | 0    | 0    | 0    | 0    | 0    | 0    | 0    |





Feuille1

|      |      |      |      |      |      |      |      |      |      |      |      |      |      |      |      |      |      |      |      |      |
|------|------|------|------|------|------|------|------|------|------|------|------|------|------|------|------|------|------|------|------|------|
| 0    | 0.01 | 0.01 | 0    | 0.01 | 0    | 0    | 0.01 | 0.01 | 0    | 0.01 | 0.01 | 0.01 | 0.01 | 0    | 0.01 | 0    | 0    | 0.01 | 0.01 | 0.01 |
| 0.01 | 0    | 0    | 0.05 | 0.03 | 0.03 | 0.09 | 0.03 | 0.04 | 0.06 | 0.05 | 0.03 | 0.04 | 0.01 | 0.01 | 0.01 | 0    | 0    | 0    | 0    | 0.01 |
| 0.01 | 0    | 0.01 | 0.01 | 0.01 | 0.02 | 0.02 | 0.01 | 0.01 | 0    | 0    | 0    | 0    | 0    | 0    | 0    | 0    | 0    | 0    | 0    | 0.03 |
| 0    | 0    | 0    | 0    | 0    | 0    | 0    | 0    | 0    | 0    | 0    | 0    | 0    | 0    | 0    | 0    | 0    | 0    | 0    | 0    | 0    |
| 0    | 0    | 0    | 0    | 0    | 0    | 0    | 0    | 0    | 0    | 0    | 0    | 0    | 0    | 0    | 0.01 | 0.01 | 0.01 | 0    | 0    | 0    |
| 0    | 0    | 0    | 0    | 0    | 0    | 0    | 0    | 0    | 0    | 0    | 0    | 0    | 0    | 0    | 0    | 0    | 0    | 0    | 0    | 0    |
| 0    | 0    | 0    | 0    | 0    | 0    | 0    | 0    | 0    | 0    | 0    | 0    | 0    | 0    | 0    | 0    | 0    | 0    | 0    | 0    | 0    |
| 0    | 0    | 0    | 0    | 0    | 0    | 0    | 0    | 0    | 0    | 0    | 0    | 0    | 0    | 0    | 0    | 0    | 0    | 0    | 0    | 0    |
| 0    | 0    | 0    | 0    | 0    | 0    | 0    | 0    | 0    | 0    | 0    | 0    | 0    | 0    | 0    | 0    | 0    | 0    | 0    | 0    | 0    |
| 0    | 0    | 0    | 0    | 0    | 0    | 0    | 0    | 0    | 0    | 0    | 0    | 0    | 0    | 0    | 0    | 0    | 0    | 0    | 0    | 0    |
| 0    | 0.02 | 0    | 0.01 | 0    | 0    | 0    | 0.01 | 0.01 | 0.01 | 0    | 0.01 | 0.02 | 0    | 0.01 | 0    | 0    | 0    | 0.01 | 0.02 | 0.04 |
| 0.01 | 0.03 | 0    | 0.03 | 0.01 | 0    | 0    | 0.02 | 0.02 | 0.01 | 0.04 | 0.03 | 0.05 | 0.02 | 0.03 | 0.01 | 0.01 | 0.04 | 0.01 | 0.04 | 0.02 |
| 0    | 0    | 0    | 0    | 0    | 0    | 0    | 0    | 0    | 0    | 0    | 0    | 0    | 0    | 0    | 0    | 0    | 0    | 0    | 0.01 | 0    |
| 0    | 0    | 0    | 0    | 0    | 0    | 0    | 0    | 0    | 0    | 0    | 0    | 0    | 0    | 0    | 0    | 0    | 0    | 0    | 0    | 0    |
| 0    | 0    | 0    | 0    | 0    | 0    | 0    | 0    | 0    | 0    | 0    | 0    | 0    | 0    | 0    | 0    | 0    | 0    | 0    | 0    | 0    |
| 0    | 0    | 0    | 0    | 0    | 0    | 0    | 0    | 0    | 0    | 0    | 0    | 0    | 0    | 0    | 0    | 0    | 0    | 0    | 0    | 0    |
| 0    | 0    | 0    | 0    | 0    | 0    | 0    | 0    | 0    | 0    | 0    | 0    | 0    | 0    | 0    | 0    | 0    | 0    | 0    | 0    | 0    |
| 0    | 0    | 0    | 0    | 0    | 0    | 0    | 0    | 0    | 0    | 0    | 0    | 0    | 0    | 0    | 0    | 0    | 0    | 0    | 0    | 0    |
| 0    | 0    | 0    | 0    | 0    | 0    | 0    | 0    | 0    | 0    | 0    | 0    | 0    | 0    | 0    | 0    | 0    | 0    | 0    | 0    | 0    |
| 0    | 0    | 0    | 0    | 0    | 0    | 0    | 0    | 0    | 0    | 0    | 0    | 0    | 0    | 0    | 0    | 0    | 0    | 0    | 0    | 0    |
| 0    | 0    | 0.01 | 0.07 | 0.05 | 0    | 0.01 | 0.06 | 0.08 | 0.02 | 0    | 0    | 0    | 0    | 0    | 0    | 0    | 0    | 0    | 0    | 0.01 |
| 0    | 0    | 0    | 0    | 0    | 0    | 0    | 0    | 0    | 0    | 0    | 0.01 | 0    | 0    | 0    | 0    | 0    | 0    | 0.01 | 0    | 0    |
| 0    | 0.01 | 0    | 0.01 | 0    | 0    | 0.02 | 0    | 0    | 0    | 0    | 0.01 | 0    | 0    | 0    | 0    | 0    | 0    | 0    | 0    | 0    |
| 0.01 | 0.01 | 0.01 | 0.01 | 0.01 | 0    | 0    | 0.01 | 0.01 | 0.02 | 0.01 | 0.01 | 0    | 0.01 | 0.01 | 0.01 | 0.01 | 0.02 | 0.03 | 0.02 | 0    |
| 0.01 | 0.03 | 0    | 0.01 | 0.01 | 0    | 0    | 0.01 | 0.01 | 0    | 0.01 | 0.01 | 0    | 0.01 | 0.01 | 0.02 | 0.01 | 0.02 | 0    | 0.02 | 0    |
| 0    | 0    | 0    | 0.03 | 0    | 0.01 | 0    | 0    | 0.01 | 0.02 | 0    | 0    | 0    | 0    | 0    | 0    | 0    | 0    | 0    | 0    | 0    |
| 0.01 | 0.01 | 0    | 0.01 | 0.02 | 0.01 | 0    | 0.02 | 0.01 | 0    | 0.01 | 0.01 | 0.01 | 0.01 | 0.02 | 0.02 | 0.01 | 0.01 | 0.02 | 0.02 | 0    |
| 0    | 0    | 0    | 0    | 0    | 0    | 0    | 0.01 | 0.01 | 0.01 | 0    | 0    | 0.01 | 0    | 0    | 0    | 0    | 0    | 0.01 | 0    | 0    |
| 0    | 0    | 0    | 0    | 0    | 0    | 0    | 0    | 0    | 0    | 0    | 0    | 0    | 0    | 0    | 0    | 0    | 0    | 0    | 0    | 0    |
| 0    | 0    | 0    | 0    | 0    | 0    | 0    | 0    | 0    | 0    | 0    | 0    | 0    | 0    | 0    | 0    | 0    | 0    | 0    | 0    | 0    |
| 0    | 0    | 0    | 0    | 0    | 0    | 0    | 0    | 0    | 0    | 0    | 0    | 0    | 0    | 0    | 0    | 0    | 0    | 0    | 0    | 0    |
| 0    | 0    | 0    | 0    | 0    | 0    | 0    | 0    | 0    | 0    | 0    | 0    | 0    | 0    | 0    | 0    | 0    | 0    | 0    | 0    | 0    |
| 0    | 0    | 0    | 0    | 0    | 0    | 0    | 0    | 0    | 0    | 0    | 0    | 0    | 0    | 0    | 0    | 0    | 0    | 0    | 0    | 0    |
| 0    | 0    | 0    | 0    | 0    | 0    | 0    | 0    | 0    | 0    | 0    | 0    | 0    | 0    | 0    | 0    | 0    | 0    | 0    | 0    | 0    |
| 0    | 0    | 0    | 0    | 0    | 0    | 0    | 0    | 0    | 0    | 0    | 0    | 0    | 0    | 0    | 0    | 0    | 0    | 0    | 0    | 0    |
| 0    | 0    | 0    | 0    | 0    | 0    | 0    | 0    | 0    | 0    | 0    | 0    | 0    | 0    | 0    | 0    | 0    | 0    | 0    | 0    | 0    |
| 0    | 0    | 0    | 0    | 0    | 0    | 0    | 0    | 0    | 0    | 0    | 0    | 0    | 0    | 0    | 0    | 0    | 0    | 0    | 0    | 0    |





















Feuille1

|      |      |      |      |      |      |      |      |      |      |   |      |      |      |   |   |      |   |      |      |
|------|------|------|------|------|------|------|------|------|------|---|------|------|------|---|---|------|---|------|------|
| 0    | 0    | 0    | 0    | 0    | 0    | 0    | 0    | 0    | 0    | 0 | 0    | 0    | 0    | 0 | 0 | 0    | 0 | 0    | 0.02 |
| 0    | 0    | 0    | 0    | 0    | 0    | 0    | 0    | 0    | 0    | 0 | 0    | 0    | 0    | 0 | 0 | 0    | 0 | 0    | 0    |
| 0    | 0    | 0    | 0    | 0    | 0    | 0    | 0    | 0    | 0    | 0 | 0    | 0    | 0    | 0 | 0 | 0    | 0 | 0    | 0    |
| 0    | 0    | 0    | 0    | 0    | 0    | 0    | 0    | 0    | 0    | 0 | 0    | 0    | 0    | 0 | 0 | 0    | 0 | 0    | 0.01 |
| 0    | 0    | 0.2  | 0    | 0    | 0    | 0    | 0    | 0    | 0    | 0 | 0    | 0.01 | 0    | 0 | 0 | 0    | 0 | 0    | 0    |
| 0.01 | 0.03 | 0    | 0.01 | 0    | 0    | 0.01 | 0.01 | 0.01 | 0.02 | 0 | 0.01 | 0.02 | 0.01 | 0 | 0 | 0.01 | 0 | 0.03 | 0    |
| 0    | 0    | 0    | 0    | 0    | 0.01 | 0    | 0    | 0    | 0    | 0 | 0    | 0    | 0    | 0 | 0 | 0    | 0 | 0    | 0    |
| 0    | 0    | 0    | 0.03 | 0.01 | 0    | 0    | 0    | 0.01 | 0.02 | 0 | 0    | 0.01 | 0    | 0 | 0 | 0    | 0 | 0.01 | 0    |
| 0    | 0    | 0    | 0    | 0    | 0    | 0    | 0    | 0    | 0    | 0 | 0    | 0    | 0    | 0 | 0 | 0    | 0 | 0    | 0    |
| 0    | 0    | 0    | 0    | 0    | 0.01 | 0    | 0    | 0    | 0    | 0 | 0    | 0    | 0    | 0 | 0 | 0    | 0 | 0    | 0    |
| 0    | 0    | 0    | 0    | 0    | 0    | 0    | 0.01 | 0.01 | 0    | 0 | 0    | 0    | 0    | 0 | 0 | 0    | 0 | 0    | 0    |
| 0    | 0.04 | 0.02 | 0.01 | 0.01 | 0    | 0    | 0    | 0.01 | 0.02 | 0 | 0    | 0    | 0    | 0 | 0 | 0    | 0 | 0    | 0.03 |
| 0.1  | 0    | 0.01 | 0    | 0.01 | 0    | 0    | 0    | 0    | 0    | 0 | 0    | 0.01 | 0    | 0 | 0 | 0    | 0 | 0    | 0.01 |

Feuille1

| miR_Ev | miR_Fil | miR_Fc | miR_Fr | miR_Gl | miR_Gl | miR_Gr | miR_Hem | miR_Hem | miR_Hem | miR_Hem | miR_Hem | miR_Hi | miR_Hc | miR_Hc | miR_Hc | miR_Hc | miR_Hc | miR_Ki |      |      |
|--------|---------|--------|--------|--------|--------|--------|---------|---------|---------|---------|---------|--------|--------|--------|--------|--------|--------|--------|------|------|
| 0.01   | 0.02    | 0.03   | 0.05   | 0.03   | 0.01   | 0.12   | 0.01    | 0.06    | 0       | 0       | 0.01    | 0.01   | 0      | 0      | 0.03   | 0.02   | 0.03   | 0.05   | 0    |      |
| 0      | 0.02    | 0.01   | 0.01   | 0.02   | 0.05   | 0.13   | 0       | 0.04    | 0       | 0       | 0       | 0      | 0      | 0.01   | 0      | 0      | 0.01   | 0      | 0.03 | 0    |
| 0      | 0       | 0      | 0      | 0.01   | 0      | 0.01   | 0       | 0.02    | 0.01    | 0       | 0       | 0      | 0      | 0      | 0      | 0      | 0      | 0      | 0.01 | 0    |
| 0      | 0       | 0      | 0      | 0      | 0      | 0      | 0       | 0       | 0       | 0       | 0       | 0      | 0      | 0      | 0      | 0.01   | 0      | 0      | 0.01 | 0    |
| 0.01   | 0       | 0      | 0      | 0      | 0      | 0      | 0       | 0       | 0       | 0       | 0       | 0      | 0      | 0      | 0      | 0      | 0      | 0      | 0    | 0    |
| 0.01   | 0.02    | 0.01   | 0.03   | 0      | 0      | 0.02   | 0       | 0.02    | 0       | 0       | 0       | 0      | 0      | 0      | 0.01   | 0.02   | 0.01   | 0      | 0.04 | 0    |
| 0      | 0.01    | 0      | 0.01   | 0      | 0      | 0      | 0       | 0.01    | 0       | 0       | 0       | 0      | 0      | 0      | 0.01   | 0.01   | 0      | 0.01   | 0.01 | 0    |
| 0      | 0.01    | 0      | 0.01   | 0      | 0      | 0.02   | 0       | 0.01    | 0       | 0       | 0       | 0      | 0      | 0      | 0      | 0      | 0.02   | 0      | 0    | 0    |
| 0      | 0       | 0      | 0      | 0      | 0      | 0      | 0       | 0.02    | 0       | 0       | 0       | 0      | 0      | 0      | 0      | 0      | 0      | 0      | 0    | 0    |
| 0      | 0       | 0      | 0      | 0      | 0.01   | 0.01   | 0       | 0       | 0       | 0       | 0       | 0      | 0      | 0      | 0      | 0      | 0      | 0      | 0    | 0    |
| 0      | 0       | 0      | 0      | 0      | 0      | 0      | 0       | 0       | 0       | 0       | 0       | 0      | 0      | 0      | 0      | 0      | 0      | 0      | 0    | 0    |
| 0      | 0       | 0      | 0      | 0      | 0      | 0      | 0       | 0       | 0       | 0       | 0       | 0      | 0      | 0      | 0      | 0      | 0      | 0      | 0    | 0    |
| 0      | 0       | 0      | 0      | 0      | 0      | 0      | 0       | 0       | 0       | 0       | 0       | 0      | 0      | 0      | 0      | 0      | 0      | 0      | 0    | 0    |
| 0      | 0       | 0      | 0      | 0      | 0      | 0      | 0.01    | 0       | 0.05    | 0.01    | 0.01    | 0.01   | 0      | 0      | 0      | 0      | 0      | 0      | 0    | 0    |
| 0.01   | 0       | 0      | 0      | 0      | 0      | 0      | 0       | 0       | 0.01    | 0       | 0.01    | 0      | 0      | 0      | 0      | 0      | 0.01   | 0.01   | 0    | 0    |
| 0      | 0       | 0      | 0      | 0      | 0      | 0      | 0       | 0       | 0       | 0       | 0       | 0      | 0      | 0      | 0      | 0      | 0      | 0      | 0    | 0    |
| 0      | 0       | 0      | 0      | 0      | 0      | 0      | 0       | 0       | 0       | 0       | 0       | 0      | 0      | 0      | 0      | 0      | 0      | 0      | 0    | 0    |
| 0.01   | 0       | 0      | 0      | 0      | 0      | 0      | 0       | 0       | 0       | 0       | 0       | 0      | 0      | 0      | 0      | 0      | 0      | 0      | 0    | 0    |
| 0      | 0       | 0      | 0      | 0      | 0      | 0      | 0       | 0       | 0       | 0       | 0       | 0      | 0      | 0      | 0      | 0      | 0      | 0      | 0    | 0    |
| 0      | 0       | 0      | 0      | 0      | 0      | 0      | 0       | 0       | 0       | 0       | 0       | 0      | 0      | 0      | 0      | 0      | 0      | 0      | 0    | 0    |
| 0.01   | 0       | 0      | 0      | 0      | 0      | 0      | 0       | 0       | 0       | 0.02    | 0.01    | 0.02   | 0.01   | 0      | 0.01   | 0      | 0.01   | 0.01   | 0    | 0.01 |
| 0      | 0       | 0      | 0      | 0      | 0      | 0      | 0       | 0       | 0.01    | 0       | 0       | 0      | 0      | 0      | 0      | 0      | 0      | 0      | 0    | 0    |
| 0      | 0       | 0      | 0      | 0      | 0      | 0      | 0       | 0       | 0       | 0       | 0       | 0      | 0      | 0      | 0      | 0      | 0      | 0      | 0    | 0.02 |
| 0      | 0       | 0      | 0      | 0      | 0      | 0      | 0       | 0       | 0       | 0       | 0       | 0      | 0      | 0      | 0      | 0      | 0      | 0      | 0    | 0    |
| 0      | 0       | 0      | 0      | 0      | 0      | 0      | 0       | 0       | 0       | 0.15    | 0.22    | 0      | 0      | 0.03   | 0      | 0      | 0      | 0      | 0    | 0    |
| 0      | 0       | 0      | 0      | 0.17   | 0      | 0      | 0       | 0       | 0       | 0       | 0       | 0      | 0      | 0      | 0.28   | 0      | 0      | 0      | 0    | 0    |
| 0      | 0       | 0      | 0      | 0      | 0      | 0      | 0       | 0       | 0       | 0       | 0       | 0      | 0      | 0      | 0      | 0      | 0      | 0      | 0    | 0    |
| 0.01   | 0.01    | 0      | 0      | 0      | 0      | 0      | 0       | 0       | 0       | 0       | 0       | 0      | 0      | 0      | 0      | 0      | 0      | 0      | 0    | 0    |
| 0      | 0.01    | 0      | 0      | 0.07   | 0.01   | 0.03   | 0       | 0.01    | 0       | 0       | 0       | 0      | 0      | 0      | 0.02   | 0      | 0      | 0      | 0    | 0    |
| 0      | 0.01    | 0.07   | 0.06   | 0.06   | 0      | 0      | 0       | 0.43    | 0       | 0       | 0       | 0      | 0.02   | 0.09   | 0      | 0      | 0      | 0      | 0.16 | 0    |
| 0      | 0       | 0      | 0      | 0      | 0      | 0      | 0       | 0       | 0       | 0       | 0       | 0      | 0      | 0      | 0      | 0      | 0      | 0      | 0    | 0    |
| 0      | 0       | 0      | 0      | 0      | 0      | 0      | 0       | 0       | 0       | 0       | 0       | 0      | 0      | 0      | 0      | 0      | 0      | 0      | 0    | 0    |
| 0      | 0       | 0      | 0      | 0.02   | 0      | 0      | 0       | 0       | 0       | 0       | 0.01    | 0      | 0      | 0      | 0.02   | 0      | 0      | 0      | 0    | 0    |
| 0      | 0       | 0      | 0      | 0.02   | 0      | 0      | 0       | 0       | 0       | 0       | 0       | 0      | 0      | 0.02   | 0      | 0      | 0      | 0      | 0    | 0    |
| 0      | 0       | 0      | 0      | 0      | 0      | 0      | 0       | 0       | 0       | 0       | 0       | 0      | 0      | 0      | 0      | 0      | 0      | 0      | 0    | 0    |
| 0      | 0       | 0      | 0      | 0      | 0      | 0      | 0       | 0       | 0       | 0       | 0       | 0      | 0      | 0      | 0      | 0      | 0      | 0      | 0    | 0    |
| 0      | 0       | 0      | 0      | 0      | 0      | 0      | 0       | 0       | 0       | 0       | 0       | 0      | 0      | 0      | 0      | 0      | 0      | 0      | 0    | 0    |
| 0      | 0       | 0      | 0      | 0      | 0      | 0      | 0       | 0       | 0       | 0       | 0       | 0      | 0      | 0      | 0      | 0.01   | 0      | 0      | 0    | 0    |
| 0      | 0       | 0      | 0      | 0      | 0      | 0      | 0       | 0       | 0       | 0       | 0       | 0      | 0      | 0      | 0      | 0      | 0      | 0      | 0    | 0    |
| 0.01   | 0.01    | 0      | 0      | 0      | 0.01   | 0      | 0       | 0       | 0.07    | 0.05    | 0.01    | 0      | 0.01   | 0      | 0      | 0      | 0      | 0      | 0.01 | 0    |
| 0      | 0       | 0      | 0      | 0      | 0      | 0      | 0       | 0       | 0       | 0.01    | 0       | 0      | 0      | 0      | 0      | 0      | 0      | 0      | 0    | 0    |

Feuille1

|      |      |      |      |      |      |      |      |      |      |      |      |      |      |      |      |      |      |      |      |      |
|------|------|------|------|------|------|------|------|------|------|------|------|------|------|------|------|------|------|------|------|------|
| 0    | 0    | 0    | 0    | 0    | 0    | 0    | 0    | 0    | 0    | 0    | 0    | 0    | 0    | 0.01 | 0    | 0    | 0    | 0    | 0    | 0    |
| 0    | 0    | 0    | 0    | 0    | 0    | 0    | 0    | 0.01 | 0    | 0    | 0    | 0    | 0    | 0    | 0    | 0    | 0    | 0    | 0    | 0    |
| 0    | 0    | 0    | 0    | 0    | 0    | 0    | 0    | 0    | 0    | 0    | 0    | 0    | 0    | 0    | 0    | 0    | 0    | 0    | 0    | 0    |
| 0    | 0    | 0    | 0    | 0    | 0    | 0    | 0    | 0    | 0    | 0    | 0    | 0    | 0    | 0    | 0    | 0    | 0    | 0    | 0    | 0    |
| 0    | 0    | 0    | 0    | 0    | 0    | 0    | 0    | 0    | 0    | 0    | 0    | 0    | 0    | 0    | 0    | 0    | 0    | 0    | 0    | 0    |
| 0    | 0    | 0    | 0    | 0    | 0    | 0    | 0    | 0    | 0    | 0    | 0    | 0    | 0    | 0    | 0    | 0    | 0    | 0    | 0    | 0    |
| 0.01 | 0.01 | 0    | 0    | 0    | 0    | 0    | 0    | 0    | 0    | 0    | 0    | 0.01 | 0.01 | 0    | 0    | 0    | 0    | 0    | 0    | 0    |
| 0    | 0    | 0    | 0    | 0    | 0    | 0    | 0    | 0    | 0    | 0    | 0    | 0    | 0    | 0    | 0    | 0    | 0    | 0    | 0    | 0    |
| 0    | 0    | 0    | 0    | 0    | 0    | 0    | 0    | 0    | 0    | 0    | 0    | 0    | 0    | 0    | 0    | 0    | 0    | 0    | 0    | 0    |
| 0    | 0    | 0    | 0    | 0    | 0    | 0    | 0    | 0    | 0    | 0    | 0    | 0    | 0    | 0    | 0    | 0    | 0    | 0    | 0    | 0    |
| 0    | 0    | 0    | 0.01 | 0    | 0    | 0    | 0    | 0    | 0    | 0    | 0    | 0    | 0    | 0    | 0    | 0    | 0    | 0    | 0    | 0    |
| 0    | 0.01 | 0.01 | 0.01 | 0    | 0.02 | 0.01 | 0.01 | 0    | 0    | 0.01 | 0.03 | 0.02 | 0.02 | 0.01 | 0.01 | 0.01 | 0.01 | 0.01 | 0.01 | 0.01 |
| 0    | 0    | 0    | 0    | 0    | 0    | 0.01 | 0    | 0    | 0    | 0    | 0    | 0    | 0    | 0    | 0    | 0    | 0    | 0    | 0    | 0    |
| 0    | 0    | 0.09 | 0.13 | 0    | 0    | 0    | 0.13 | 0    | 0    | 0    | 0    | 0    | 0    | 0    | 0.08 | 0.06 | 0.06 | 0.05 | 0.11 | 0    |
| 0    | 0    | 0.23 | 0.28 | 0    | 0    | 0.01 | 0.42 | 0    | 0    | 0    | 0    | 0    | 0    | 0    | 0.13 | 0.09 | 0.09 | 0.07 | 0.09 | 0    |
| 0.15 | 0.02 | 0.03 | 0.01 | 0.02 | 0    | 0.01 | 0.03 | 0.12 | 0    | 0    | 0    | 0    | 0    | 0.03 | 0    | 0    | 0    | 0    | 0.01 | 0    |
| 0    | 0    | 0    | 0    | 0    | 0    | 0    | 0    | 0    | 0    | 0    | 0    | 0    | 0    | 0    | 0    | 0    | 0    | 0    | 0    | 0    |
| 0.01 | 0    | 0    | 0    | 0    | 0    | 0    | 0    | 0    | 0    | 0    | 0    | 0    | 0    | 0    | 0    | 0    | 0    | 0    | 0    | 0    |
| 0    | 0.01 | 0.01 | 0.02 | 0    | 0    | 0    | 0    | 0    | 0    | 0.02 | 0.01 | 0    | 0    | 0    | 0    | 0.01 | 0    | 0.07 | 0    | 0    |
| 0    | 0    | 0    | 0    | 0    | 0    | 0    | 0    | 0    | 0    | 0    | 0    | 0    | 0    | 0    | 0    | 0    | 0    | 0    | 0    | 0    |
| 0    | 0    | 0    | 0    | 0    | 0    | 0    | 0    | 0    | 0    | 0    | 0    | 0    | 0    | 0    | 0    | 0    | 0    | 0    | 0    | 0    |
| 0    | 0    | 0    | 0    | 0    | 0    | 0    | 0    | 0    | 0    | 0    | 0    | 0    | 0    | 0    | 0    | 0    | 0    | 0    | 0    | 0    |
| 0    | 0    | 0    | 0    | 0    | 0    | 0    | 0    | 0    | 0    | 0    | 0    | 0    | 0    | 0    | 0    | 0    | 0    | 0    | 0    | 0    |
| 0    | 0    | 0    | 0    | 0    | 0    | 0    | 0    | 0    | 0    | 0    | 0    | 0    | 0    | 0    | 0    | 0    | 0    | 0    | 0    | 0    |
| 0    | 0    | 0    | 0    | 0    | 0    | 0    | 0    | 0    | 0    | 0    | 0    | 0    | 0    | 0    | 0    | 0    | 0    | 0    | 0    | 0    |
| 0    | 0    | 0    | 0    | 0    | 0    | 0    | 0    | 0    | 0    | 0    | 0    | 0    | 0    | 0    | 0    | 0    | 0    | 0    | 0    | 0    |
| 0    | 0    | 0.01 | 0.01 | 0    | 0    | 0    | 0    | 0    | 0    | 0    | 0    | 0    | 0    | 0    | 0    | 0    | 0    | 0    | 0    | 0    |
| 0    | 0    | 0    | 0    | 0    | 0    | 0    | 0    | 0    | 0.02 | 0    | 0    | 0    | 0    | 0    | 0    | 0    | 0    | 0    | 0    | 0    |
| 0.01 | 0    | 0    | 0    | 0    | 0    | 0    | 0    | 0    | 0    | 0.02 | 0.01 | 0.01 | 0    | 0    | 0    | 0    | 0    | 0    | 0    | 0    |
| 0    | 0.01 | 0    | 0    | 0    | 0    | 0    | 0    | 0    | 0    | 0    | 0    | 0    | 0    | 0    | 0    | 0    | 0    | 0    | 0    | 0    |
| 0    | 0    | 0    | 0    | 0    | 0    | 0    | 0    | 0    | 0    | 0    | 0    | 0    | 0    | 0    | 0.01 | 0    | 0    | 0    | 0    | 0    |
| 0    | 0    | 0    | 0    | 0    | 0    | 0    | 0    | 0    | 0    | 0    | 0    | 0    | 0    | 0    | 0    | 0    | 0    | 0    | 0    | 0    |
| 0    | 0    | 0    | 0    | 0    | 0    | 0    | 0    | 0    | 0    | 0    | 0    | 0    | 0    | 0    | 0    | 0    | 0    | 0    | 0    | 0    |
| 0    | 0    | 0    | 0.01 | 0    | 0    | 0    | 0    | 0    | 0    | 0    | 0    | 0    | 0    | 0    | 0.09 | 0.09 | 0.05 | 0.1  | 0.01 | 0    |
| 0.03 | 0.01 | 0.05 | 0.01 | 0.01 | 0.04 | 0.03 | 0.02 | 0    | 0.02 | 0.01 | 0.02 | 0.01 | 0.04 | 0.01 | 0.01 | 0.02 | 0.03 | 0.02 | 0.03 | 0.17 |
| 0    | 0    | 0    | 0    | 0    | 0    | 0.01 | 0    | 0    | 0.03 | 0    | 0    | 0    | 0    | 0    | 0    | 0.01 | 0    | 0.02 | 0    | 0.01 |



Feuille1

|      |      |      |      |      |      |      |      |      |      |      |      |      |      |      |      |      |      |      |      |      |
|------|------|------|------|------|------|------|------|------|------|------|------|------|------|------|------|------|------|------|------|------|
| 0    | 0    | 0    | 0    | 0    | 0    | 0    | 0    | 0    | 0    | 0    | 0    | 0    | 0    | 0    | 0    | 0    | 0    | 0    | 0    | 0    |
| 0    | 0    | 0    | 0    | 0    | 0    | 0    | 0    | 0    | 0    | 0    | 0    | 0    | 0    | 0    | 0    | 0    | 0    | 0    | 0    | 0    |
| 0    | 0    | 0    | 0    | 0    | 0    | 0    | 0    | 0    | 0    | 0    | 0    | 0    | 0    | 0    | 0    | 0    | 0    | 0    | 0    | 0    |
| 0    | 0    | 0    | 0    | 0    | 0    | 0    | 0    | 0    | 0    | 0    | 0    | 0    | 0    | 0    | 0    | 0    | 0    | 0    | 0    | 0    |
| 0    | 0    | 0    | 0    | 0    | 0    | 0    | 0    | 0    | 0    | 0    | 0    | 0    | 0    | 0    | 0    | 0    | 0    | 0    | 0    | 0    |
| 0    | 0    | 0    | 0    | 0    | 0    | 0    | 0    | 0    | 0    | 0    | 0    | 0    | 0    | 0    | 0    | 0    | 0    | 0    | 0    | 0    |
| 0    | 0    | 0    | 0    | 0    | 0    | 0    | 0    | 0    | 0    | 0    | 0    | 0    | 0    | 0    | 0    | 0    | 0    | 0    | 0    | 0    |
| 0    | 0    | 0    | 0    | 0    | 0    | 0    | 0    | 0    | 0    | 0    | 0    | 0    | 0    | 0    | 0    | 0    | 0    | 0    | 0    | 0    |
| 0    | 0    | 0    | 0    | 0    | 0    | 0    | 0    | 0    | 0    | 0    | 0    | 0    | 0    | 0    | 0    | 0    | 0    | 0    | 0    | 0    |
| 0.01 | 0    | 0    | 0    | 0    | 0    | 0    | 0    | 0    | 0.02 | 0.01 | 0.02 | 0.01 | 0.01 | 0    | 0.01 | 0.01 | 0.01 | 0.01 | 0.01 | 0.02 |
| 0    | 0    | 0    | 0    | 0    | 0    | 0    | 0    | 0    | 0    | 0    | 0    | 0    | 0    | 0    | 0    | 0    | 0    | 0    | 0    | 0    |
| 0.06 | 0.07 | 0.03 | 0.07 | 0    | 0.1  | 0.11 | 0.01 | 0    | 0.13 | 0.09 | 0.23 | 0.33 | 0.12 | 0    | 0.1  | 0.03 | 0.09 | 0.12 | 0.02 | 0    |
| 0    | 0    | 0    | 0    | 0    | 0    | 0.01 | 0    | 0    | 0    | 0    | 0    | 0    | 0    | 0    | 0    | 0    | 0.01 | 0.01 | 0    | 0    |
| 0    | 0    | 0    | 0    | 0    | 0    | 0    | 0    | 0    | 0    | 0    | 0    | 0    | 0    | 0    | 0    | 0    | 0    | 0    | 0    | 0    |
| 0    | 0    | 0    | 0    | 0    | 0    | 0    | 0    | 0    | 0    | 0    | 0    | 0    | 0    | 0    | 0    | 0    | 0    | 0    | 0    | 0    |
| 0    | 0    | 0    | 0    | 0    | 0    | 0    | 0    | 0    | 0    | 0    | 0    | 0    | 0    | 0    | 0    | 0    | 0    | 0    | 0    | 0    |
| 0    | 0    | 0    | 0    | 0    | 0    | 0    | 0    | 0    | 0    | 0    | 0    | 0    | 0    | 0    | 0    | 0    | 0    | 0    | 0    | 0    |
| 0    | 0    | 0    | 0    | 0    | 0    | 0    | 0    | 0    | 0    | 0.01 | 0    | 0    | 0    | 0    | 0    | 0    | 0    | 0    | 0    | 0    |
| 0    | 0    | 0    | 0    | 0    | 0    | 0    | 0    | 0    | 0    | 0    | 0    | 0    | 0    | 0    | 0    | 0    | 0    | 0    | 0    | 0    |
| 0    | 0    | 0    | 0    | 0    | 0    | 0    | 0    | 0    | 0    | 0    | 0    | 0    | 0    | 0    | 0    | 0    | 0    | 0    | 0    | 0    |
| 0    | 0    | 0    | 0    | 0    | 0    | 0    | 0    | 0    | 0    | 0    | 0    | 0    | 0    | 0    | 0    | 0    | 0    | 0    | 0    | 0    |
| 0    | 0    | 0    | 0    | 0    | 0    | 0    | 0    | 0    | 0    | 0    | 0    | 0    | 0    | 0    | 0    | 0    | 0    | 0    | 0    | 0    |
| 0    | 0    | 0    | 0    | 0    | 0    | 0    | 0    | 0    | 0    | 0    | 0    | 0    | 0    | 0    | 0    | 0    | 0    | 0    | 0    | 0    |
| 0    | 0    | 0    | 0    | 0    | 0    | 0    | 0    | 0    | 0    | 0    | 0    | 0    | 0    | 0    | 0    | 0    | 0    | 0    | 0    | 0    |
| 0.01 | 0.04 | 0    | 0.01 | 0.01 | 0.02 | 0.02 | 0.01 | 0.01 | 0.07 | 0.03 | 0.01 | 0.02 | 0.04 | 0.01 | 0    | 0    | 0    | 0    | 0    | 0    |
| 0    | 0    | 0    | 0    | 0    | 0    | 0    | 0    | 0    | 0    | 0    | 0    | 0    | 0    | 0    | 0    | 0    | 0    | 0    | 0    | 0    |
| 0    | 0    | 0    | 0    | 0    | 0    | 0    | 0    | 0    | 0    | 0    | 0    | 0    | 0    | 0    | 0    | 0    | 0    | 0    | 0    | 0    |
| 0    | 0    | 0    | 0    | 0    | 0    | 0    | 0    | 0    | 0    | 0    | 0    | 0    | 0    | 0    | 0    | 0    | 0    | 0    | 0    | 0    |
| 0    | 0.02 | 0    | 0    | 0    | 0    | 0    | 0    | 0    | 0    | 0    | 0    | 0    | 0    | 0    | 0    | 0    | 0    | 0    | 0    | 0.02 |
| 0    | 0.01 | 0    | 0    | 0    | 0    | 0    | 0    | 0    | 0    | 0    | 0    | 0    | 0    | 0    | 0    | 0    | 0    | 0    | 0    | 0.01 |
| 0    | 0    | 0    | 0    | 0    | 0    | 0    | 0.09 | 0    | 0    | 0    | 0    | 0    | 0    | 0    | 0    | 0    | 0    | 0    | 0.01 | 0    |
| 0    | 0    | 0    | 0    | 0    | 0    | 0    | 0    | 0    | 0    | 0    | 0    | 0    | 0    | 0    | 0    | 0    | 0    | 0    | 0    | 0    |
| 0    | 0.03 | 0    | 0    | 0    | 0.01 | 0.03 | 0.01 | 0    | 0    | 0    | 0    | 0    | 0.01 | 0    | 0    | 0    | 0    | 0    | 0.01 | 0    |
| 0    | 0    | 0    | 0    | 0.01 | 0    | 0    | 0    | 0.01 | 0    | 0.02 | 0.01 | 0.01 | 0    | 0    | 0    | 0    | 0    | 0    | 0    | 0    |
| 0.01 | 0.06 | 0    | 0    | 0.01 | 0.03 | 0.02 | 0.01 | 0    | 0.02 | 0.03 | 0.03 | 0.02 | 0.03 | 0.01 | 0.01 | 0.03 | 0.02 | 0.03 | 0.01 | 0.01 |
| 0    | 0    | 0    | 0    | 0    | 0    | 0    | 0    | 0    | 0    | 0.02 | 0    | 0.01 | 0    | 0    | 0    | 0.01 | 0    | 0.01 | 0    | 0    |
| 0.01 | 0.01 | 0.02 | 0.01 | 0.02 | 0    | 0.01 | 0.01 | 0.01 | 0.03 | 0.03 | 0.02 | 0.03 | 0.01 | 0.01 | 0    | 0    | 0    | 0.01 | 0.02 | 0    |



Feuille1

|      |      |      |      |      |      |      |      |      |      |      |      |      |      |      |      |      |      |      |      |      |
|------|------|------|------|------|------|------|------|------|------|------|------|------|------|------|------|------|------|------|------|------|
| 0.01 | 0.01 | 0.01 | 0    | 0    | 0    | 0    | 0.01 | 0    | 0.02 | 0.02 | 0.02 | 0.02 | 0    | 0    | 0    | 0    | 0.01 | 0    | 0.01 | 0    |
| 0    | 0.09 | 0.01 | 0.01 | 0    | 0.05 | 0.09 | 0.03 | 0.01 | 0.01 | 0.01 | 0.01 | 0.02 | 0.05 | 0.01 | 0.01 | 0.02 | 0.02 | 0.05 | 0.02 | 0    |
| 0.01 | 0.02 | 0    | 0    | 0.01 | 0.01 | 0    | 0    | 0.02 | 0.01 | 0.03 | 0.03 | 0.03 | 0.01 | 0.01 | 0    | 0.01 | 0    | 0    | 0    | 0    |
| 0    | 0    | 0    | 0    | 0    | 0    | 0    | 0    | 0    | 0    | 0    | 0    | 0    | 0    | 0    | 0    | 0    | 0    | 0    | 0    | 0    |
| 0    | 0.01 | 0    | 0.01 | 0    | 0.01 | 0    | 0    | 0    | 0    | 0    | 0.01 | 0.01 | 0.01 | 0    | 0    | 0    | 0    | 0    | 0    | 0    |
| 0    | 0    | 0    | 0    | 0    | 0    | 0    | 0    | 0    | 0    | 0    | 0    | 0    | 0    | 0    | 0    | 0    | 0    | 0    | 0    | 0    |
| 0    | 0    | 0    | 0    | 0    | 0    | 0    | 0    | 0    | 0    | 0    | 0    | 0    | 0    | 0    | 0    | 0    | 0    | 0    | 0    | 0    |
| 0    | 0    | 0    | 0    | 0    | 0    | 0    | 0    | 0    | 0    | 0    | 0    | 0    | 0    | 0    | 0    | 0    | 0    | 0    | 0    | 0    |
| 0    | 0    | 0    | 0    | 0    | 0    | 0    | 0    | 0    | 0    | 0    | 0    | 0    | 0    | 0    | 0    | 0    | 0    | 0    | 0    | 0    |
| 0    | 0.02 | 0.02 | 0.02 | 0.02 | 0.03 | 0.05 | 0    | 0.01 | 0    | 0    | 0.01 | 0.03 | 0.01 | 0.01 | 0.01 | 0.01 | 0.02 | 0    | 0    | 0    |
| 0    | 0.06 | 0.08 | 0.05 | 0.02 | 0.02 | 0.05 | 0.01 | 0    | 0    | 0    | 0.05 | 0.05 | 0.06 | 0.04 | 0.15 | 0.05 | 0.13 | 0.01 | 0    | 0.01 |
| 0    | 0    | 0.01 | 0.01 | 0    | 0    | 0    | 0    | 0.01 | 0    | 0    | 0    | 0    | 0    | 0    | 0    | 0    | 0    | 0    | 0    | 0    |
| 0    | 0    | 0    | 0    | 0    | 0    | 0    | 0    | 0    | 0    | 0    | 0    | 0    | 0    | 0    | 0    | 0    | 0    | 0    | 0    | 0    |
| 0    | 0    | 0    | 0    | 0    | 0    | 0    | 0    | 0    | 0    | 0.01 | 0    | 0    | 0    | 0    | 0    | 0    | 0    | 0    | 0    | 0    |
| 0    | 0    | 0    | 0    | 0    | 0    | 0    | 0    | 0    | 0    | 0    | 0    | 0    | 0    | 0    | 0    | 0    | 0    | 0    | 0    | 0    |
| 0    | 0    | 0    | 0    | 0    | 0    | 0    | 0    | 0    | 0    | 0    | 0    | 0    | 0    | 0    | 0    | 0    | 0    | 0    | 0    | 0    |
| 0    | 0    | 0    | 0    | 0    | 0    | 0    | 0    | 0    | 0    | 0    | 0    | 0    | 0    | 0    | 0    | 0    | 0    | 0    | 0    | 0    |
| 0    | 0    | 0    | 0    | 0    | 0    | 0    | 0    | 0    | 0    | 0    | 0    | 0    | 0    | 0    | 0    | 0    | 0    | 0    | 0    | 0    |
| 0    | 0    | 0    | 0    | 0    | 0    | 0    | 0    | 0    | 0    | 0    | 0    | 0    | 0    | 0    | 0    | 0    | 0    | 0    | 0    | 0    |
| 0    | 0    | 0    | 0    | 0    | 0    | 0    | 0    | 0    | 0    | 0    | 0    | 0    | 0    | 0    | 0    | 0    | 0    | 0    | 0    | 0    |
| 0    | 0    | 0    | 0    | 0    | 0    | 0    | 0    | 0    | 0    | 0    | 0    | 0    | 0    | 0    | 0    | 0    | 0    | 0    | 0    | 0    |
| 0.01 | 0.01 | 0    | 0    | 0    | 0.02 | 0    | 0    | 0.01 | 0    | 0    | 0    | 0    | 0.01 | 0.01 | 0    | 0    | 0    | 0.01 | 0    | 0.01 |
| 0    | 0    | 0    | 0    | 0    | 0    | 0    | 0    | 0    | 0    | 0    | 0    | 0    | 0    | 0    | 0    | 0    | 0    | 0    | 0    | 0    |
| 0    | 0    | 0.01 | 0    | 0    | 0    | 0    | 0    | 0.01 | 0    | 0    | 0    | 0    | 0    | 0    | 0    | 0    | 0    | 0    | 0    | 0    |
| 0.01 | 0.01 | 0.01 | 0    | 0    | 0.02 | 0    | 0    | 0.03 | 0    | 0.02 | 0.01 | 0.02 | 0.01 | 0.01 | 0.01 | 0.01 | 0.01 | 0    | 0.01 | 0.02 |
| 0    | 0.01 | 0.04 | 0.02 | 0    | 0.01 | 0.01 | 0.01 | 0.01 | 0    | 0.01 | 0.02 | 0.02 | 0.02 | 0.01 | 0.01 | 0.01 | 0.01 | 0.01 | 0.01 | 0.01 |
| 0    | 0.03 | 0    | 0    | 0    | 0    | 0    | 0    | 0    | 0    | 0    | 0    | 0    | 0    | 0    | 0    | 0    | 0    | 0    | 0    | 0    |
| 0.01 | 0.01 | 0.01 | 0    | 0    | 0.01 | 0    | 0.01 | 0    | 0.02 | 0.01 | 0.07 | 0.04 | 0.04 | 0    | 0    | 0.01 | 0    | 0    | 0    | 0.01 |
| 0    | 0    | 0    | 0    | 0    | 0    | 0    | 0    | 0    | 0    | 0.01 | 0    | 0    | 0    | 0    | 0.01 | 0    | 0    | 0    | 0.01 | 0    |
| 0    | 0    | 0    | 0    | 0    | 0    | 0    | 0    | 0    | 0    | 0    | 0    | 0    | 0    | 0    | 0    | 0    | 0    | 0    | 0    | 0    |
| 0    | 0    | 0    | 0    | 0    | 0    | 0    | 0    | 0    | 0    | 0    | 0    | 0    | 0    | 0    | 0    | 0    | 0    | 0    | 0    | 0    |
| 0    | 0    | 0    | 0    | 0    | 0    | 0    | 0    | 0    | 0    | 0    | 0    | 0    | 0    | 0    | 0    | 0    | 0    | 0    | 0    | 0.01 |
| 0    | 0    | 0    | 0    | 0    | 0    | 0    | 0    | 0    | 0    | 0    | 0    | 0    | 0    | 0    | 0.01 | 0    | 0.01 | 0    | 0    | 0    |
| 0    | 0    | 0    | 0    | 0    | 0    | 0    | 0    | 0    | 0    | 0    | 0    | 0    | 0    | 0    | 0    | 0    | 0    | 0    | 0    | 0    |
| 0    | 0    | 0    | 0    | 0    | 0    | 0    | 0    | 0    | 0    | 0    | 0    | 0    | 0    | 0    | 0    | 0    | 0    | 0    | 0    | 0    |
| 0    | 0    | 0    | 0    | 0    | 0    | 0    | 0    | 0    | 0    | 0    | 0    | 0    | 0    | 0    | 0    | 0    | 0    | 0    | 0    | 0    |
| 0    | 0    | 0    | 0    | 0    | 0    | 0    | 0    | 0    | 0    | 0    | 0    | 0    | 0    | 0    | 0    | 0    | 0    | 0    | 0    | 0    |
| 0    | 0    | 0    | 0    | 0    | 0    | 0    | 0    | 0    | 0    | 0    | 0    | 0    | 0    | 0    | 0    | 0    | 0    | 0    | 0    | 0    |





















Feuille1

|      |   |   |   |      |      |      |   |   |      |      |      |      |      |      |      |      |      |      |      |      |
|------|---|---|---|------|------|------|---|---|------|------|------|------|------|------|------|------|------|------|------|------|
| 0    | 0 | 0 | 0 | 0    | 0    | 0    | 0 | 0 | 0    | 0    | 0    | 0    | 0    | 0    | 0    | 0    | 0    | 0    | 0    | 0    |
| 0    | 0 | 0 | 0 | 0    | 0    | 0    | 0 | 0 | 0    | 0    | 0    | 0    | 0    | 0    | 0    | 0    | 0    | 0    | 0    | 0    |
| 0    | 0 | 0 | 0 | 0    | 0    | 0    | 0 | 0 | 0    | 0    | 0    | 0    | 0    | 0    | 0    | 0    | 0    | 0    | 0    | 0    |
| 0    | 0 | 0 | 0 | 0    | 0    | 0    | 0 | 0 | 0    | 0    | 0    | 0    | 0    | 0    | 0    | 0    | 0    | 0    | 0    | 0    |
| 0.14 | 0 | 0 | 0 | 0.2  | 0.26 | 0.01 | 0 | 0 | 0    | 0    | 0    | 0    | 0.01 | 0.15 | 0.03 | 0.03 | 0.04 | 0    | 0    | 0    |
| 0.01 | 0 | 0 | 0 | 0    | 0    | 0.01 | 0 | 0 | 0.03 | 0.02 | 0.01 | 0.01 | 0.01 | 0    | 0.01 | 0.04 | 0.01 | 0.02 | 0.03 | 0.02 |
| 0    | 0 | 0 | 0 | 0    | 0    | 0    | 0 | 0 | 0    | 0    | 0    | 0    | 0    | 0    | 0    | 0    | 0    | 0    | 0    | 0    |
| 0.01 | 0 | 0 | 0 | 0    | 0    | 0    | 0 | 0 | 0    | 0    | 0.01 | 0.02 | 0.01 | 0    | 0.02 | 0.01 | 0.01 | 0.01 | 0    | 0.02 |
| 0    | 0 | 0 | 0 | 0    | 0    | 0    | 0 | 0 | 0    | 0    | 0    | 0    | 0    | 0    | 0    | 0    | 0    | 0    | 0    | 0    |
| 0    | 0 | 0 | 0 | 0    | 0    | 0    | 0 | 0 | 0    | 0    | 0    | 0    | 0.01 | 0.01 | 0    | 0    | 0    | 0    | 0    | 0    |
| 0    | 0 | 0 | 0 | 0    | 0    | 0    | 0 | 0 | 0.01 | 0    | 0    | 0    | 0    | 0    | 0    | 0    | 0    | 0    | 0    | 0    |
| 0    | 0 | 0 | 0 | 0.03 | 0.03 | 0    | 0 | 0 | 0    | 0    | 0    | 0    | 0    | 0.01 | 0    | 0    | 0    | 0    | 0    | 0.02 |
| 0.04 | 0 | 0 | 0 | 0.01 | 0.01 | 0    | 0 | 0 | 0    | 0    | 0.01 | 0    | 0.01 | 0.01 | 0    | 0    | 0    | 0.01 | 0    | 0    |

Feuille1

| miR_KimiR_KimiR_KimiR_Li | miR_LumiR_LumiR_LumiR_LumiR_M | miR_MimiR_MimiR_MimiR_MimiR_MimiR_MimiR_NemiR_NemiR_NemiR_Ne |      |      |      |      |      |      |      |      |      |      |      |      |      |      |      |      |      |      |      |
|--------------------------|-------------------------------|--------------------------------------------------------------|------|------|------|------|------|------|------|------|------|------|------|------|------|------|------|------|------|------|------|
| 0                        | 0.01                          | 0.01                                                         | 0.02 | 0.05 | 0.06 | 0.04 | 0.08 | 0.01 | 0.02 | 0.01 | 0.06 | 0.05 | 0.03 | 0.04 | 0.02 | 0.02 | 0    | 0    | 0.09 | 0    |      |
| 0                        | 0                             | 0                                                            | 0.01 | 0.02 | 0.01 | 0.01 | 0.05 | 0.01 | 0    | 0    | 0.03 | 0.03 | 0.02 | 0.05 | 0.01 | 0.02 | 0    | 0.01 | 0.04 | 0.02 |      |
| 0                        | 0                             | 0                                                            | 0.01 | 0    | 0    | 0    | 0    | 0    | 0    | 0.01 | 0    | 0    | 0    | 0.01 | 0    | 0    | 0    | 0    | 0.01 | 0    |      |
| 0                        | 0                             | 0                                                            | 0    | 0.01 | 0    | 0    | 0.01 | 0    | 0    | 0    | 0    | 0    | 0    | 0    | 0    | 0    | 0    | 0    | 0    | 0    |      |
| 0                        | 0                             | 0                                                            | 0    | 0.01 | 0.01 | 0.01 | 0.02 | 0    | 0    | 0    | 0    | 0    | 0.01 | 0.01 | 0    | 0    | 0    | 0    | 0    | 0    |      |
| 0.01                     | 0                             | 0.01                                                         | 0    | 0.04 | 0.04 | 0.04 | 0.08 | 0.05 | 0.04 | 0.05 | 0.02 | 0.01 | 0.01 | 0    | 0.01 | 0.01 | 0    | 0    | 0.04 | 0    |      |
| 0                        | 0                             | 0                                                            | 0    | 0    | 0    | 0    | 0    | 0    | 0.01 | 0    | 0.01 | 0.01 | 0    | 0    | 0.01 | 0    | 0    | 0    | 0.01 | 0    |      |
| 0                        | 0                             | 0                                                            | 0    | 0.03 | 0.03 | 0.04 | 0.03 | 0    | 0    | 0.01 | 0.01 | 0.01 | 0.02 | 0    | 0    | 0.01 | 0    | 0    | 0.01 | 0    |      |
| 0                        | 0                             | 0                                                            | 0    | 0    | 0    | 0    | 0    | 0    | 0    | 0    | 0    | 0    | 0    | 0    | 0    | 0    | 0    | 0    | 0    | 0    |      |
| 0                        | 0                             | 0                                                            | 0    | 0    | 0    | 0    | 0    | 0    | 0    | 0    | 0    | 0    | 0    | 0.01 | 0.01 | 0    | 0    | 0    | 0    | 0    |      |
| 0                        | 0                             | 0                                                            | 0    | 0    | 0    | 0    | 0    | 0    | 0    | 0    | 0    | 0    | 0    | 0    | 0    | 0    | 0    | 0    | 0    | 0    |      |
| 0                        | 0                             | 0                                                            | 0    | 0    | 0    | 0    | 0    | 0    | 0    | 0    | 0    | 0    | 0    | 0    | 0    | 0    | 0    | 0    | 0    | 0    |      |
| 0                        | 0.01                          | 0                                                            | 0    | 0    | 0    | 0    | 0    | 0.01 | 0    | 0    | 0.01 | 0.01 | 0    | 0    | 0    | 0.01 | 0    | 0.01 | 0.01 | 0.01 |      |
| 0.01                     | 0                             | 0                                                            | 0    | 0    | 0    | 0    | 0    | 0    | 0    | 0    | 0    | 0    | 0    | 0    | 0.01 | 0    | 0    | 0    | 0.01 | 0    |      |
| 0                        | 0                             | 0                                                            | 0    | 0    | 0    | 0    | 0    | 0    | 0    | 0    | 0    | 0    | 0    | 0    | 0    | 0    | 0    | 0    | 0    | 0    |      |
| 0                        | 0                             | 0                                                            | 0    | 0    | 0    | 0    | 0    | 0    | 0    | 0    | 0    | 0    | 0    | 0    | 0    | 0    | 0    | 0    | 0.01 | 0    |      |
| 0.01                     | 0.01                          | 0.02                                                         | 0    | 0    | 0    | 0    | 0    | 0    | 0    | 0    | 0    | 0    | 0    | 0    | 0    | 0    | 0.01 | 0    | 0.03 | 0.01 |      |
| 0                        | 0                             | 0                                                            | 0    | 0    | 0    | 0    | 0    | 0    | 0    | 0    | 0    | 0    | 0    | 0    | 0    | 0    | 0    | 0    | 0    | 0    |      |
| 0.02                     | 0.03                          | 0.03                                                         | 0    | 0    | 0    | 0    | 0    | 0    | 0    | 0    | 0    | 0    | 0    | 0    | 0    | 0    | 0    | 0    | 0    | 0    |      |
| 0.01                     | 0                             | 0.01                                                         | 0    | 0    | 0    | 0    | 0    | 0    | 0    | 0    | 0    | 0    | 0    | 0    | 0    | 0    | 0    | 0    | 0.02 | 0.02 |      |
| 0                        | 0                             | 0                                                            | 0.72 | 0    | 0    | 0    | 0    | 0    | 0    | 0    | 0    | 0    | 0.01 | 0    | 0    | 0    | 0    | 0    | 0    | 0    |      |
| 0                        | 0                             | 0                                                            | 0    | 0    | 0    | 0    | 0    | 0    | 0    | 0    | 0    | 0    | 0.01 | 0.1  | 0    | 0    | 0.09 | 0.19 | 0.04 | 0.14 |      |
| 0                        | 0                             | 0                                                            | 0    | 0    | 0    | 0    | 0    | 0    | 0    | 0    | 0    | 0    | 0    | 0    | 0    | 0    | 0    | 0    | 0    | 0    |      |
| 0                        | 0                             | 0                                                            | 0    | 0    | 0    | 0    | 0    | 0    | 0    | 0    | 0    | 0    | 0    | 0.01 | 0    | 0    | 0    | 0    | 0    | 0.01 |      |
| 0                        | 0                             | 0                                                            | 0.01 | 0    | 0    | 0    | 0    | 0    | 0    | 0    | 0    | 0    | 0.02 | 0.06 | 0    | 0    | 0.01 | 0.01 | 0.01 | 0.01 |      |
| 0                        | 0.01                          | 0                                                            | 0.06 | 0    | 0    | 0.01 | 0.01 | 0    | 0    | 0    | 0.03 | 0.06 | 0.01 | 0.06 | 0    | 0.04 | 0    | 0.01 | 0    | 0.03 |      |
| 0                        | 0                             | 0                                                            | 0    | 0    | 0    | 0    | 0    | 0    | 0    | 0    | 0    | 0    | 0    | 0    | 0    | 0    | 0    | 0    | 0    | 0    |      |
| 0                        | 0                             | 0                                                            | 0    | 0    | 0    | 0    | 0    | 0    | 0    | 0    | 0    | 0    | 0    | 0    | 0    | 0    | 0    | 0    | 0    | 0    |      |
| 0                        | 0                             | 0                                                            | 0    | 0    | 0    | 0    | 0    | 0    | 0    | 0    | 0    | 0    | 0    | 0.01 | 0    | 0    | 0    | 0    | 0    | 0    |      |
| 0                        | 0                             | 0                                                            | 0    | 0    | 0    | 0    | 0    | 0    | 0    | 0    | 0    | 0    | 0    | 0.01 | 0    | 0    | 0    | 0    | 0    | 0    |      |
| 0                        | 0                             | 0                                                            | 0    | 0    | 0    | 0    | 0    | 0    | 0    | 0    | 0    | 0    | 0    | 0    | 0    | 0    | 0    | 0    | 0    | 0    |      |
| 0                        | 0                             | 0                                                            | 0    | 0    | 0    | 0    | 0    | 0    | 0    | 0    | 0    | 0    | 0    | 0    | 0    | 0    | 0    | 0    | 0    | 0    |      |
| 0                        | 0                             | 0                                                            | 0    | 0    | 0    | 0    | 0    | 0    | 0    | 0    | 0    | 0    | 0    | 0    | 0    | 0    | 0    | 0    | 0    | 0    |      |
| 0                        | 0                             | 0                                                            | 0    | 0    | 0.01 | 0.01 | 0.01 | 0    | 0    | 0    | 0    | 0    | 0    | 0.02 | 0    | 0    | 0    | 0.02 | 0    | 0.01 | 0.02 |
| 0                        | 0                             | 0                                                            | 0    | 0    | 0    | 0    | 0    | 0    | 0    | 0    | 0    | 0    | 0    | 0    | 0    | 0    | 0    | 0    | 0    | 0.01 |      |



Feuille1

|      |      |      |      |      |      |      |      |      |      |      |      |      |      |      |      |      |      |      |      |      |
|------|------|------|------|------|------|------|------|------|------|------|------|------|------|------|------|------|------|------|------|------|
| 0.12 | 0.1  | 0.07 | 0.03 | 0.05 | 0.07 | 0.05 | 0.07 | 0.07 | 0.08 | 0.09 | 0.11 | 0.1  | 0.03 | 0.06 | 0.18 | 0.08 | 0.16 | 0.02 | 0.07 | 0.08 |
| 0.04 | 0.04 | 0.02 | 0    | 0.01 | 0.01 | 0.01 | 0    | 0.01 | 0.03 | 0.01 | 0    | 0    | 0.01 | 0    | 0    | 0    | 0.02 | 0    | 0.01 | 0.01 |
| 0    | 0    | 0    | 0.01 | 0    | 0    | 0    | 0    | 0.01 | 0    | 0    | 0.01 | 0.01 | 0.01 | 0.08 | 0.01 | 0    | 0.01 | 0    | 0    | 0.01 |
| 0    | 0    | 0    | 0    | 0    | 0    | 0    | 0    | 0.01 | 0    | 0    | 0    | 0    | 0    | 0    | 0    | 0    | 0    | 0    | 0    | 0    |
| 0    | 0    | 0    | 0    | 0    | 0    | 0    | 0    | 0    | 0    | 0    | 0    | 0    | 0    | 0    | 0    | 0    | 0    | 0    | 0    | 0    |
| 0    | 0    | 0    | 0    | 0    | 0    | 0    | 0    | 0    | 0    | 0    | 0    | 0    | 0    | 0    | 0    | 0    | 0    | 0    | 0    | 0    |
| 0    | 0.01 | 0.01 | 0    | 0    | 0    | 0.01 | 0.01 | 0    | 0    | 0    | 0    | 0    | 0.01 | 0    | 0    | 0    | 0    | 0    | 0    | 0    |
| 0    | 0    | 0    | 0    | 0    | 0    | 0.01 | 0    | 0    | 0    | 0    | 0    | 0    | 0    | 0    | 0    | 0    | 0    | 0    | 0    | 0    |
| 0    | 0    | 0    | 0    | 0    | 0    | 0    | 0    | 0    | 0    | 0    | 0    | 0    | 0    | 0    | 0    | 0    | 0    | 0    | 0    | 0    |
| 0    | 0    | 0    | 0    | 0    | 0    | 0    | 0    | 0    | 0    | 0    | 0    | 0    | 0    | 0    | 0    | 0    | 0    | 0    | 0    | 0    |
| 0.01 | 0.01 | 0.02 | 0    | 0.01 | 0    | 0.01 | 0    | 0    | 0    | 0    | 0    | 0    | 0.02 | 0    | 0    | 0    | 0    | 0    | 0.01 | 0    |
| 0    | 0    | 0    | 0    | 0    | 0    | 0    | 0    | 0    | 0    | 0    | 0    | 0    | 0    | 0    | 0    | 0    | 0    | 0    | 0    | 0    |
| 0    | 0    | 0    | 0    | 0    | 0    | 0    | 0    | 0    | 0    | 0    | 0    | 0    | 0    | 0    | 0    | 0    | 0    | 0    | 0    | 0    |
| 0    | 0    | 0    | 0    | 0    | 0    | 0    | 0    | 0    | 0    | 0    | 0    | 0    | 0    | 0    | 0    | 0    | 0    | 0    | 0    | 0    |
| 0.03 | 0.05 | 0.05 | 0    | 0    | 0    | 0    | 0    | 0    | 0.01 | 0    | 0    | 0    | 0    | 0    | 0    | 0    | 0    | 0.01 | 0.01 | 0.01 |
| 0    | 0    | 0    | 0    | 0    | 0    | 0    | 0    | 0    | 0    | 0    | 0    | 0    | 0    | 0    | 0    | 0    | 0    | 0    | 0    | 0    |
| 0    | 0    | 0    | 0    | 0    | 0    | 0    | 0    | 0    | 0    | 0    | 0    | 0    | 0    | 0    | 0    | 0    | 0    | 0    | 0    | 0    |
| 0    | 0    | 0    | 0    | 0    | 0    | 0    | 0    | 0    | 0    | 0    | 0    | 0    | 0    | 0    | 0    | 0    | 0    | 0    | 0    | 0    |
| 0.01 | 0.01 | 0.01 | 0    | 0.01 | 0.01 | 0.01 | 0.01 | 0.01 | 0    | 0.01 | 0    | 0    | 0    | 0    | 0.01 | 0    | 0    | 0    | 0.01 | 0.01 |
| 0    | 0    | 0    | 0    | 0.01 | 0.01 | 0.01 | 0.01 | 0    | 0    | 0    | 0    | 0    | 0    | 0    | 0    | 0    | 0    | 0    | 0    | 0    |
| 0    | 0    | 0    | 0    | 0    | 0    | 0    | 0    | 0    | 0    | 0    | 0    | 0    | 0    | 0    | 0    | 0    | 0    | 0    | 0    | 0    |
| 0    | 0    | 0    | 0    | 0    | 0    | 0    | 0    | 0    | 0    | 0    | 0    | 0    | 0    | 0    | 0    | 0    | 0    | 0    | 0    | 0    |
| 0    | 0    | 0    | 0    | 0    | 0    | 0    | 0    | 0    | 0    | 0    | 0    | 0    | 0    | 0    | 0    | 0    | 0    | 0    | 0    | 0    |
| 0    | 0    | 0    | 0.01 | 0    | 0.01 | 0.01 | 0.01 | 0    | 0    | 0    | 0    | 0    | 0    | 0    | 0    | 0    | 0    | 0    | 0    | 0    |
| 0    | 0    | 0    | 0    | 0    | 0    | 0    | 0    | 0    | 0    | 0    | 0    | 0    | 0    | 0    | 0    | 0    | 0    | 0    | 0    | 0    |
| 0    | 0.01 | 0.01 | 0    | 0    | 0    | 0    | 0    | 0    | 0    | 0    | 0    | 0    | 0    | 0    | 0    | 0    | 0    | 0    | 0    | 0    |
| 0.04 | 0.09 | 0.05 | 0    | 0    | 0    | 0    | 0    | 0    | 0    | 0    | 0    | 0    | 0    | 0    | 0    | 0    | 0    | 0    | 0    | 0    |
| 0    | 0    | 0    | 0    | 0    | 0    | 0    | 0    | 0    | 0    | 0    | 0    | 0    | 0    | 0    | 0    | 0    | 0    | 0    | 0    | 0    |
| 0    | 0    | 0    | 0    | 0    | 0    | 0    | 0    | 0    | 0    | 0    | 0    | 0    | 0    | 0    | 0    | 0    | 0    | 0    | 0    | 0    |
| 0    | 0    | 0    | 0    | 0    | 0    | 0    | 0    | 0    | 0    | 0    | 0    | 0    | 0    | 0    | 0    | 0    | 0    | 0    | 0    | 0    |
| 0    | 0    | 0    | 0    | 0    | 0    | 0    | 0    | 0    | 0    | 0    | 0    | 0    | 0    | 0    | 0    | 0    | 0    | 0    | 0    | 0    |
| 0    | 0    | 0    | 0    | 0    | 0    | 0    | 0    | 0    | 0    | 0    | 0    | 0    | 0    | 0    | 0    | 0    | 0    | 0    | 0    | 0    |
| 0    | 0    | 0    | 0    | 0    | 0    | 0    | 0    | 0    | 0    | 0    | 0    | 0    | 0    | 0    | 0    | 0    | 0    | 0    | 0    | 0    |
| 0    | 0    | 0    | 0    | 0    | 0    | 0    | 0    | 0    | 0    | 0    | 0    | 0    | 0    | 0    | 0    | 0    | 0    | 0    | 0    | 0    |
| 0.03 | 0.06 | 0.09 | 0    | 0.01 | 0.01 | 0.01 | 0.01 | 0.02 | 0.08 | 0.01 | 0    | 0    | 0    | 0    | 0.01 | 0    | 0.01 | 0    | 0.01 | 0.01 |
| 0.04 | 0.04 | 0.1  | 0    | 0.01 | 0.01 | 0.01 | 0    | 0.05 | 0.17 | 0.03 | 0    | 0    | 0    | 0    | 0.01 | 0    | 0.01 | 0.01 | 0.01 | 0.01 |
| 0    | 0    | 0    | 0    | 0    | 0    | 0    | 0    | 0    | 0    | 0    | 0    | 0    | 0    | 0    | 0    | 0    | 0    | 0    | 0    | 0    |

Feuille1

|      |      |      |      |      |      |      |      |      |      |      |      |      |      |      |      |      |      |      |      |
|------|------|------|------|------|------|------|------|------|------|------|------|------|------|------|------|------|------|------|------|
| 0    | 0    | 0    | 0    | 0    | 0    | 0    | 0    | 0    | 0    | 0    | 0    | 0    | 0    | 0    | 0    | 0    | 0    | 0    | 0    |
| 0    | 0    | 0    | 0    | 0    | 0    | 0    | 0    | 0.01 | 0    | 0    | 0    | 0    | 0    | 0    | 0    | 0    | 0    | 0    | 0    |
| 0    | 0    | 0    | 0    | 0    | 0    | 0    | 0    | 0    | 0    | 0    | 0    | 0    | 0    | 0    | 0    | 0    | 0    | 0    | 0    |
| 0    | 0    | 0    | 0    | 0    | 0    | 0    | 0    | 0    | 0    | 0    | 0    | 0    | 0    | 0    | 0    | 0    | 0    | 0    | 0    |
| 0    | 0    | 0    | 0    | 0    | 0    | 0    | 0    | 0    | 0    | 0    | 0    | 0    | 0    | 0    | 0    | 0    | 0    | 0    | 0    |
| 0    | 0    | 0    | 0    | 0    | 0    | 0    | 0    | 0    | 0    | 0    | 0    | 0    | 0    | 0    | 0    | 0    | 0    | 0    | 0    |
| 0    | 0    | 0    | 0    | 0    | 0    | 0    | 0    | 0    | 0    | 0    | 0    | 0    | 0    | 0.01 | 0    | 0    | 0    | 0    | 0    |
| 0    | 0    | 0    | 0    | 0    | 0    | 0    | 0    | 0    | 0    | 0    | 0    | 0    | 0    | 0    | 0    | 0    | 0    | 0    | 0    |
| 0.04 | 0.03 | 0.04 | 0    | 0.01 | 0    | 0.01 | 0    | 0.01 | 0.06 | 0.01 | 0    | 0    | 0    | 0    | 0    | 0    | 0    | 0.01 | 0.01 |
| 0    | 0    | 0    | 0    | 0    | 0    | 0    | 0    | 0    | 0    | 0    | 0    | 0    | 0    | 0    | 0    | 0    | 0    | 0    | 0    |
| 0.01 | 0    | 0    | 0    | 0.24 | 0.23 | 0.26 | 0.19 | 0.09 | 0.01 | 0.06 | 0.02 | 0.06 | 0.1  | 0    | 0.06 | 0.04 | 0    | 0    | 0.01 |
| 0    | 0    | 0    | 0    | 0    | 0    | 0    | 0    | 0    | 0    | 0    | 0    | 0    | 0    | 0    | 0    | 0    | 0    | 0    | 0    |
| 0    | 0    | 0    | 0    | 0    | 0    | 0    | 0    | 0    | 0    | 0    | 0    | 0    | 0    | 0    | 0    | 0    | 0    | 0    | 0    |
| 0    | 0    | 0    | 0    | 0    | 0    | 0    | 0    | 0    | 0    | 0    | 0    | 0    | 0    | 0    | 0    | 0    | 0    | 0    | 0    |
| 0    | 0    | 0    | 0    | 0    | 0    | 0    | 0    | 0    | 0    | 0    | 0    | 0    | 0    | 0    | 0    | 0    | 0    | 0    | 0    |
| 0    | 0    | 0    | 0    | 0    | 0    | 0    | 0    | 0    | 0    | 0    | 0    | 0    | 0    | 0    | 0    | 0    | 0    | 0    | 0    |
| 0    | 0    | 0    | 0    | 0    | 0    | 0    | 0    | 0    | 0    | 0    | 0    | 0    | 0    | 0    | 0    | 0    | 0    | 0    | 0    |
| 0    | 0    | 0    | 0    | 0    | 0    | 0    | 0    | 0    | 0    | 0    | 0    | 0    | 0    | 0    | 0    | 0    | 0    | 0    | 0    |
| 0    | 0    | 0    | 0    | 0    | 0    | 0    | 0    | 0    | 0    | 0    | 0    | 0    | 0    | 0    | 0    | 0    | 0    | 0    | 0    |
| 0    | 0.01 | 0.01 | 0    | 0    | 0    | 0    | 0    | 0    | 0    | 0    | 0    | 0    | 0    | 0    | 0    | 0    | 0.01 | 0    | 0.03 |
| 0    | 0    | 0    | 0    | 0    | 0    | 0    | 0    | 0    | 0    | 0    | 0    | 0    | 0    | 0    | 0    | 0    | 0    | 0    | 0    |
| 0    | 0.01 | 0.01 | 0.01 | 0.01 | 0.01 | 0.01 | 0    | 0    | 0    | 0    | 0    | 0.01 | 0.02 | 0.01 | 0.01 | 0.01 | 0    | 0    | 0    |
| 0    | 0    | 0    | 0    | 0    | 0    | 0    | 0    | 0    | 0    | 0    | 0    | 0    | 0    | 0    | 0    | 0    | 0    | 0    | 0    |
| 0    | 0    | 0    | 0    | 0    | 0    | 0    | 0    | 0    | 0    | 0    | 0    | 0    | 0    | 0    | 0    | 0    | 0    | 0    | 0    |
| 0    | 0    | 0    | 0    | 0    | 0    | 0    | 0    | 0    | 0    | 0    | 0    | 0    | 0    | 0    | 0    | 0    | 0    | 0    | 0    |
| 0.01 | 0.01 | 0.01 | 0    | 0    | 0    | 0    | 0    | 0    | 0    | 0    | 0    | 0    | 0    | 0    | 0    | 0    | 0    | 0    | 0    |
| 0    | 0    | 0    | 0    | 0    | 0    | 0    | 0    | 0    | 0    | 0    | 0    | 0    | 0    | 0    | 0    | 0    | 0    | 0    | 0    |
| 0    | 0    | 0    | 0    | 0.01 | 0    | 0    | 0    | 0    | 0    | 0    | 0    | 0    | 0    | 0    | 0    | 0    | 0    | 0    | 0    |
| 0    | 0    | 0    | 0    | 0.01 | 0.02 | 0.01 | 0.01 | 0    | 0    | 0.01 | 0    | 0    | 0.04 | 0    | 0    | 0    | 0    | 0    | 0    |
| 0    | 0    | 0    | 0    | 0.01 | 0.01 | 0.01 | 0.02 | 0    | 0    | 0    | 0    | 0    | 0.01 | 0.01 | 0    | 0    | 0.01 | 0    | 0.02 |
| 0.01 | 0.01 | 0    | 0    | 0.03 | 0.05 | 0.03 | 0.03 | 0.01 | 0    | 0.01 | 0    | 0    | 0.06 | 0.02 | 0.03 | 0    | 0.04 | 0    | 0.03 |
| 0.02 | 0.01 | 0.01 | 0    | 0.01 | 0.01 | 0    | 0    | 0.01 | 0    | 0    | 0    | 0    | 0    | 0    | 0    | 0    | 0.01 | 0    | 0.02 |
| 0.01 | 0.01 | 0    | 0    | 0.01 | 0    | 0.01 | 0.01 | 0    | 0.01 | 0.01 | 0.01 | 0.01 | 0    | 0.02 | 0.01 | 0.03 | 0    | 0    | 0.02 |

Feuille1

|      |      |      |   |      |      |      |      |      |      |      |      |      |      |      |      |      |      |      |      |      |
|------|------|------|---|------|------|------|------|------|------|------|------|------|------|------|------|------|------|------|------|------|
| 0.01 | 0    | 0    | 0 | 0.01 | 0.01 | 0.01 | 0    | 0.01 | 0.01 | 0    | 0.01 | 0    | 0    | 0    | 0.01 | 0.01 | 0    | 0    | 0    | 0    |
| 0    | 0    | 0    | 0 | 0.03 | 0.03 | 0.03 | 0.02 | 0.02 | 0    | 0.02 | 0.01 | 0    | 0.07 | 0    | 0.05 | 0.01 | 0.05 | 0    | 0.01 | 0.03 |
| 0.01 | 0.01 | 0    | 0 | 0.03 | 0.05 | 0.02 | 0.04 | 0    | 0    | 0    | 0    | 0    | 0.02 | 0.01 | 0    | 0    | 0.02 | 0    | 0.02 | 0.01 |
| 0    | 0    | 0    | 0 | 0    | 0    | 0    | 0    | 0    | 0    | 0    | 0    | 0    | 0.01 | 0    | 0    | 0    | 0    | 0    | 0    | 0    |
| 0    | 0.01 | 0    | 0 | 0.01 | 0    | 0.01 | 0    | 0    | 0    | 0    | 0    | 0.01 | 0    | 0.01 | 0    | 0    | 0.01 | 0    | 0    | 0    |
| 0    | 0    | 0    | 0 | 0    | 0    | 0    | 0    | 0    | 0    | 0    | 0    | 0    | 0    | 0    | 0    | 0    | 0    | 0    | 0    | 0    |
| 0    | 0    | 0    | 0 | 0    | 0    | 0    | 0    | 0    | 0    | 0    | 0    | 0    | 0    | 0    | 0    | 0    | 0    | 0    | 0    | 0    |
| 0    | 0    | 0    | 0 | 0    | 0    | 0    | 0    | 0    | 0    | 0    | 0    | 0    | 0    | 0    | 0    | 0    | 0    | 0    | 0    | 0    |
| 0    | 0    | 0    | 0 | 0    | 0    | 0    | 0    | 0    | 0    | 0    | 0    | 0    | 0    | 0    | 0    | 0    | 0    | 0    | 0    | 0    |
| 0    | 0    | 0    | 0 | 0    | 0    | 0    | 0    | 0    | 0    | 0    | 0    | 0    | 0    | 0    | 0    | 0    | 0    | 0    | 0    | 0    |
| 0    | 0    | 0    | 0 | 0    | 0    | 0    | 0    | 0    | 0    | 0    | 0    | 0    | 0    | 0    | 0    | 0    | 0    | 0    | 0    | 0    |
| 0    | 0    | 0    | 0 | 0.01 | 0.01 | 0.01 | 0.01 | 0.01 | 0    | 0    | 0.02 | 0.02 | 0.01 | 0.02 | 0    | 0.02 | 0    | 0    | 0    | 0    |
| 0.01 | 0    | 0.01 | 0 | 0.04 | 0.02 | 0.02 | 0.02 | 0.01 | 0.01 | 0.02 | 0.05 | 0.07 | 0.05 | 0.01 | 0.01 | 0.06 | 0    | 0    | 0    | 0    |
| 0    | 0    | 0.01 | 0 | 0    | 0    | 0    | 0    | 0    | 0    | 0    | 0.01 | 0    | 0    | 0    | 0.01 | 0    | 0    | 0    | 0    | 0    |
| 0    | 0    | 0    | 0 | 0    | 0    | 0    | 0    | 0    | 0    | 0    | 0    | 0    | 0    | 0    | 0    | 0    | 0    | 0    | 0    | 0    |
| 0    | 0    | 0    | 0 | 0    | 0    | 0    | 0    | 0    | 0    | 0    | 0    | 0    | 0    | 0    | 0    | 0    | 0    | 0    | 0    | 0    |
| 0    | 0    | 0.01 | 0 | 0    | 0    | 0    | 0    | 0    | 0    | 0    | 0    | 0    | 0    | 0    | 0    | 0    | 0.01 | 0    | 0    | 0.01 |
| 0    | 0    | 0    | 0 | 0    | 0    | 0    | 0    | 0    | 0    | 0    | 0    | 0    | 0    | 0    | 0    | 0    | 0    | 0    | 0    | 0    |
| 0    | 0    | 0    | 0 | 0    | 0    | 0    | 0    | 0    | 0    | 0    | 0    | 0    | 0    | 0    | 0    | 0    | 0    | 0    | 0    | 0    |
| 0    | 0    | 0    | 0 | 0    | 0    | 0    | 0    | 0    | 0    | 0    | 0    | 0    | 0    | 0    | 0    | 0    | 0    | 0    | 0    | 0    |
| 0    | 0    | 0    | 0 | 0    | 0    | 0    | 0    | 0    | 0    | 0    | 0    | 0    | 0    | 0    | 0    | 0    | 0    | 0    | 0    | 0    |
| 0    | 0    | 0    | 0 | 0    | 0    | 0    | 0    | 0    | 0    | 0    | 0    | 0    | 0    | 0    | 0    | 0    | 0    | 0    | 0    | 0    |
| 0    | 0.01 | 0    | 0 | 0.01 | 0.01 | 0.01 | 0.01 | 0    | 0    | 0    | 0    | 0    | 0.02 | 0.01 | 0    | 0    | 0    | 0    | 0    | 0.01 |
| 0    | 0    | 0    | 0 | 0    | 0    | 0    | 0    | 0    | 0    | 0    | 0    | 0    | 0    | 0    | 0    | 0    | 0    | 0    | 0    | 0    |
| 0.01 | 0    | 0    | 0 | 0    | 0    | 0    | 0    | 0.01 | 0    | 0    | 0    | 0    | 0    | 0    | 0    | 0    | 0    | 0    | 0    | 0    |
| 0.01 | 0.01 | 0    | 0 | 0    | 0.01 | 0    | 0    | 0.01 | 0    | 0    | 0    | 0.01 | 0    | 0.01 | 0.01 | 0.02 | 0.01 | 0.03 | 0.01 | 0.02 |
| 0.01 | 0.01 | 0.01 | 0 | 0.01 | 0    | 0.01 | 0.01 | 0.03 | 0.01 | 0.02 | 0.02 | 0.01 | 0.01 | 0    | 0.01 | 0.02 | 0    | 0.01 | 0.01 | 0.01 |
| 0    | 0    | 0    | 0 | 0.01 | 0.01 | 0.02 | 0.01 | 0    | 0    | 0    | 0    | 0    | 0    | 0    | 0    | 0    | 0    | 0    | 0    | 0    |
| 0.02 | 0.04 | 0.02 | 0 | 0.02 | 0.01 | 0.01 | 0.02 | 0    | 0    | 0    | 0    | 0    | 0.02 | 0    | 0.01 | 0.01 | 0.01 | 0.02 | 0.01 | 0.01 |
| 0    | 0.01 | 0    | 0 | 0    | 0    | 0.01 | 0    | 0    | 0    | 0    | 0    | 0    | 0    | 0    | 0    | 0    | 0.03 | 0    | 0    | 0.01 |
| 0    | 0    | 0    | 0 | 0    | 0    | 0    | 0    | 0    | 0    | 0    | 0    | 0    | 0    | 0    | 0    | 0    | 0    | 0    | 0    | 0    |
| 0    | 0    | 0    | 0 | 0    | 0    | 0    | 0    | 0    | 0    | 0    | 0    | 0    | 0    | 0    | 0    | 0    | 0    | 0    | 0    | 0    |
| 0    | 0    | 0    | 0 | 0    | 0    | 0    | 0    | 0    | 0    | 0    | 0    | 0    | 0    | 0    | 0    | 0    | 0    | 0    | 0.01 | 0    |
| 0.01 | 0    | 0    | 0 | 0    | 0    | 0    | 0    | 0    | 0    | 0    | 0    | 0    | 0    | 0    | 0    | 0    | 0    | 0    | 0    | 0    |
| 0    | 0    | 0    | 0 | 0    | 0    | 0    | 0    | 0    | 0    | 0    | 0    | 0    | 0    | 0    | 0    | 0    | 0    | 0    | 0    | 0    |
| 0    | 0    | 0    | 0 | 0    | 0    | 0    | 0    | 0    | 0    | 0    | 0    | 0    | 0    | 0    | 0    | 0    | 0    | 0    | 0    | 0    |
| 0    | 0    | 0    | 0 | 0    | 0    | 0    | 0    | 0    | 0    | 0    | 0    | 0    | 0    | 0    | 0    | 0    | 0    | 0    | 0    | 0    |
| 0    | 0    | 0    | 0 | 0    | 0    | 0    | 0    | 0    | 0    | 0    | 0    | 0    | 0    | 0    | 0    | 0    | 0    | 0    | 0    | 0    |























Feuille1

|      |      |      |      |      |      |      |      |      |      |      |      |      |      |      |      |   |      |      |      |      |
|------|------|------|------|------|------|------|------|------|------|------|------|------|------|------|------|---|------|------|------|------|
| 0    | 0    | 0    | 0    | 0    | 0    | 0    | 0    | 0    | 0    | 0    | 0    | 0    | 0    | 0    | 0    | 0 | 0    | 0    | 0    |      |
| 0    | 0    | 0    | 0    | 0    | 0    | 0    | 0    | 0    | 0    | 0    | 0    | 0    | 0    | 0    | 0    | 0 | 0    | 0    | 0    |      |
| 0    | 0    | 0    | 0    | 0    | 0    | 0    | 0    | 0    | 0    | 0    | 0    | 0    | 0    | 0    | 0    | 0 | 0    | 0    | 0    |      |
| 0    | 0    | 0    | 0    | 0    | 0    | 0    | 0    | 0    | 0    | 0    | 0    | 0    | 0    | 0    | 0    | 0 | 0    | 0    | 0    |      |
| 0.01 | 0    | 0    | 0    | 0    | 0    | 0    | 0    | 0    | 0    | 0    | 0    | 0    | 0    | 0.14 | 0    | 0 | 0.09 | 0.21 | 0.05 | 0.1  |
| 0.07 | 0.02 | 0.05 | 0    | 0.01 | 0.01 | 0.01 | 0.01 | 0.02 | 0.04 | 0.03 | 0.01 | 0.01 | 0.01 | 0    | 0.01 | 0 | 0    | 0.01 | 0.02 | 0.01 |
| 0    | 0    | 0    | 0    | 0    | 0    | 0    | 0    | 0    | 0    | 0    | 0    | 0    | 0    | 0    | 0    | 0 | 0    | 0    | 0    | 0    |
| 0.03 | 0.02 | 0    | 0    | 0    | 0    | 0.01 | 0.01 | 0    | 0    | 0    | 0    | 0    | 0.01 | 0    | 0.01 | 0 | 0    | 0.01 | 0.01 | 0.02 |
| 0    | 0    | 0    | 0    | 0    | 0    | 0    | 0    | 0    | 0    | 0    | 0    | 0    | 0    | 0    | 0    | 0 | 0    | 0    | 0    | 0    |
| 0.01 | 0    | 0    | 0    | 0    | 0.01 | 0    | 0    | 0    | 0    | 0    | 0    | 0    | 0    | 0    | 0    | 0 | 0    | 0    | 0    | 0    |
| 0    | 0    | 0    | 0    | 0    | 0    | 0.01 | 0.01 | 0    | 0    | 0    | 0    | 0    | 0    | 0    | 0    | 0 | 0    | 0    | 0    | 0    |
| 0.01 | 0    | 0    | 0.01 | 0    | 0    | 0    | 0    | 0    | 0    | 0.03 | 0    | 0    | 0    | 0.04 | 0    | 0 | 0.01 | 0.05 | 0.02 | 0.03 |
| 0.01 | 0    | 0.01 | 0    | 0.01 | 0.01 | 0.01 | 0.01 | 0    | 0    | 0    | 0    | 0    | 0.02 | 0.02 | 0    | 0 | 0.01 | 0.04 | 0.01 | 0.03 |





Feuille1

|      |      |      |      |      |      |      |      |      |      |      |      |      |      |      |      |      |      |      |      |      |
|------|------|------|------|------|------|------|------|------|------|------|------|------|------|------|------|------|------|------|------|------|
| 0.06 | 0.1  | 0.11 | 0.1  | 0.05 | 0.07 | 0.12 | 0.04 | 0.11 | 0.04 | 0.04 | 0.06 | 0.1  | 0.07 | 0.02 | 0.04 | 0.04 | 0.03 | 0.21 | 0.11 | 0.12 |
| 0    | 0    | 0.01 | 0.01 | 0    | 0    | 0    | 0    | 0    | 0    | 0    | 0    | 0    | 0    | 0    | 0.01 | 0.01 | 0    | 0.01 | 0.01 | 0.01 |
| 0.01 | 0    | 0    | 0    | 0    | 0    | 0.01 | 0    | 0    | 0.01 | 0.01 | 0    | 0    | 0    | 0.01 | 0    | 0    | 0.01 | 0.01 | 0.05 | 0.05 |
| 0    | 0    | 0    | 0    | 0    | 0    | 0    | 0    | 0    | 0    | 0    | 0    | 0    | 0    | 0    | 0    | 0    | 0    | 0.01 | 0.01 | 0.02 |
| 0    | 0    | 0    | 0    | 0    | 0    | 0    | 0    | 0    | 0    | 0    | 0    | 0    | 0    | 0    | 0    | 0    | 0    | 0    | 0    | 0    |
| 0    | 0    | 0    | 0    | 0    | 0    | 0    | 0    | 0    | 0    | 0    | 0    | 0    | 0    | 0    | 0    | 0    | 0    | 0    | 0    | 0    |
| 0    | 0    | 0    | 0    | 0    | 0    | 0.01 | 0    | 0    | 0.01 | 0    | 0    | 0    | 0    | 0    | 0.01 | 0.01 | 0    | 0    | 0    | 0    |
| 0    | 0    | 0    | 0    | 0    | 0    | 0    | 0    | 0    | 0    | 0    | 0    | 0    | 0    | 0    | 0    | 0    | 0    | 0    | 0    | 0    |
| 0    | 0    | 0    | 0    | 0    | 0    | 0    | 0    | 0    | 0    | 0    | 0    | 0    | 0    | 0    | 0    | 0    | 0    | 0    | 0    | 0    |
| 0    | 0    | 0    | 0    | 0    | 0    | 0    | 0    | 0    | 0    | 0    | 0    | 0    | 0    | 0    | 0    | 0    | 0    | 0    | 0    | 0    |
| 0    | 0.02 | 0.01 | 0.01 | 0    | 0    | 0    | 0    | 0    | 0    | 0    | 0    | 0    | 0.01 | 0.01 | 0    | 0.01 | 0    | 0    | 0    | 0    |
| 0    | 0    | 0    | 0    | 0    | 0    | 0    | 0    | 0    | 0    | 0    | 0    | 0    | 0    | 0    | 0    | 0    | 0    | 0    | 0    | 0    |
| 0    | 0    | 0    | 0    | 0    | 0    | 0    | 0    | 0    | 0    | 0    | 0    | 0    | 0    | 0    | 0    | 0    | 0    | 0    | 0    | 0    |
| 0    | 0    | 0    | 0    | 0    | 0    | 0    | 0    | 0    | 0    | 0    | 0    | 0    | 0    | 0    | 0    | 0    | 0    | 0    | 0    | 0    |
| 0    | 0    | 0    | 0.01 | 0    | 0    | 0    | 0    | 0    | 0    | 0    | 0    | 0    | 0    | 0    | 0.06 | 0.01 | 0    | 0.01 | 0    | 0    |
| 0    | 0    | 0    | 0    | 0    | 0    | 0    | 0    | 0    | 0    | 0    | 0    | 0    | 0    | 0    | 0.01 | 0.01 | 0    | 0    | 0    | 0    |
| 0    | 0    | 0    | 0    | 0    | 0    | 0    | 0    | 0    | 0    | 0    | 0    | 0    | 0    | 0    | 0    | 0    | 0    | 0    | 0    | 0    |
| 0    | 0    | 0    | 0    | 0    | 0    | 0    | 0    | 0    | 0    | 0    | 0    | 0    | 0    | 0    | 0    | 0    | 0    | 0    | 0    | 0    |
| 0    | 0    | 0    | 0    | 0    | 0.01 | 0    | 0    | 0.01 | 0.01 | 0.01 | 0    | 0.01 | 0.02 | 0.01 | 0.04 | 0    | 0.01 | 0.03 | 0    | 0    |
| 0    | 0    | 0    | 0    | 0    | 0    | 0    | 0    | 0    | 0    | 0    | 0    | 0    | 0    | 0    | 0    | 0    | 0    | 0    | 0    | 0    |
| 0    | 0    | 0    | 0    | 0    | 0    | 0    | 0    | 0    | 0    | 0    | 0    | 0    | 0    | 0    | 0    | 0    | 0    | 0    | 0    | 0    |
| 0    | 0    | 0    | 0    | 0    | 0    | 0    | 0    | 0    | 0    | 0    | 0    | 0    | 0    | 0    | 0    | 0    | 0    | 0    | 0    | 0    |
| 0    | 0    | 0    | 0    | 0    | 0    | 0    | 0    | 0    | 0    | 0    | 0    | 0    | 0    | 0    | 0    | 0    | 0    | 0    | 0    | 0    |
| 0    | 0    | 0    | 0    | 0.01 | 0    | 0.01 | 0    | 0    | 0    | 0    | 0.01 | 0    | 0    | 0    | 0    | 0    | 0    | 0    | 0    | 0    |
| 0    | 0    | 0.01 | 0.01 | 0    | 0    | 0    | 0    | 0    | 0    | 0    | 0    | 0    | 0    | 0    | 0    | 0    | 0    | 0    | 0    | 0    |
| 0    | 0    | 0    | 0    | 0    | 0    | 0    | 0    | 0    | 0    | 0.01 | 0    | 0    | 0    | 0    | 0    | 0    | 0    | 0    | 0.02 | 0.01 |
| 0    | 0.02 | 0    | 0    | 0    | 0    | 0    | 0    | 0    | 0    | 0    | 0    | 0    | 0    | 0    | 0    | 0    | 0    | 0    | 0    | 0    |
| 0    | 0.02 | 0    | 0    | 0    | 0    | 0    | 0    | 0    | 0    | 0    | 0    | 0    | 0    | 0    | 0    | 0    | 0    | 0    | 0    | 0    |
| 0    | 0    | 0    | 0    | 0.01 | 0    | 0    | 0    | 0    | 0    | 0    | 0.01 | 0    | 0    | 0    | 0    | 0    | 0    | 0    | 0    | 0    |
| 0    | 0    | 0    | 0    | 0    | 0    | 0    | 0    | 0    | 0    | 0    | 0    | 0    | 0    | 0    | 0    | 0    | 0    | 0    | 0    | 0    |
| 0    | 0    | 0    | 0    | 0    | 0    | 0    | 0    | 0    | 0    | 0    | 0    | 0    | 0    | 0    | 0    | 0    | 0    | 0    | 0    | 0    |
| 0    | 0    | 0    | 0    | 0    | 0    | 0    | 0    | 0    | 0    | 0    | 0    | 0    | 0    | 0.01 | 0    | 0    | 0.01 | 0    | 0    | 0    |
| 0    | 0    | 0.01 | 0.01 | 0    | 0    | 0    | 0    | 0    | 0    | 0.01 | 0    | 0    | 0    | 0    | 0.01 | 0.02 | 0    | 0.01 | 0.01 | 0.01 |
| 0    | 0    | 0.01 | 0.01 | 0    | 0    | 0    | 0    | 0    | 0    | 0.01 | 0    | 0    | 0    | 0    | 0.01 | 0.05 | 0    | 0    | 0.01 | 0    |
| 0    | 0    | 0    | 0    | 0    | 0.02 | 0    | 0    | 0    | 0    | 0.01 | 0    | 0    | 0    | 0    | 0    | 0    | 0    | 0    | 0    | 0    |

Feuille1

|      |      |      |      |      |      |      |      |      |      |      |      |      |      |      |      |      |      |      |      |      |
|------|------|------|------|------|------|------|------|------|------|------|------|------|------|------|------|------|------|------|------|------|
| 0    | 0    | 0    | 0    | 0    | 0.01 | 0    | 0    | 0    | 0    | 0.01 | 0    | 0    | 0    | 0    | 0    | 0    | 0    | 0    | 0    | 0    |
| 0    | 0    | 0    | 0    | 0    | 0.04 | 0.03 | 0.02 | 0    | 0    | 0    | 0.02 | 0    | 0    | 0    | 0    | 0    | 0.03 | 0    | 0    | 0    |
| 0    | 0    | 0    | 0    | 0    | 0    | 0    | 0    | 0    | 0    | 0    | 0    | 0    | 0    | 0    | 0    | 0    | 0    | 0    | 0    | 0    |
| 0    | 0    | 0    | 0    | 0    | 0    | 0    | 0    | 0    | 0    | 0    | 0    | 0    | 0    | 0    | 0    | 0    | 0    | 0    | 0    | 0    |
| 0    | 0    | 0    | 0    | 0    | 0    | 0    | 0    | 0    | 0    | 0    | 0    | 0    | 0    | 0    | 0    | 0    | 0    | 0    | 0    | 0    |
| 0    | 0    | 0    | 0    | 0    | 0    | 0    | 0    | 0    | 0    | 0    | 0    | 0    | 0    | 0    | 0    | 0    | 0    | 0    | 0    | 0    |
| 0    | 0    | 0    | 0    | 0    | 0    | 0    | 0    | 0    | 0    | 0    | 0    | 0    | 0    | 0    | 0    | 0    | 0    | 0    | 0    | 0    |
| 0    | 0    | 0    | 0    | 0    | 0    | 0    | 0    | 0    | 0    | 0    | 0    | 0    | 0    | 0    | 0    | 0    | 0    | 0    | 0    | 0    |
| 0    | 0    | 0.01 | 0.01 | 0    | 0    | 0    | 0    | 0.02 | 0    | 0    | 0    | 0    | 0    | 0    | 0.01 | 0    | 0    | 0.01 | 0.01 | 0.01 |
| 0    | 0    | 0    | 0    | 0    | 0    | 0    | 0    | 0    | 0    | 0    | 0    | 0    | 0    | 0    | 0.01 | 0.01 | 0    | 0    | 0    | 0    |
| 0.02 | 0.18 | 0.22 | 0.21 | 0    | 0.03 | 0    | 0.01 | 0.12 | 0.16 | 0.15 | 0.02 | 0.06 | 0.04 | 0.05 | 0    | 0.01 | 0.01 | 0    | 0.02 | 0.02 |
| 0    | 0    | 0    | 0    | 0    | 0    | 0    | 0    | 0    | 0    | 0    | 0    | 0    | 0    | 0.01 | 0    | 0    | 0    | 0    | 0    | 0    |
| 0    | 0    | 0    | 0    | 0    | 0    | 0    | 0    | 0    | 0    | 0    | 0    | 0    | 0    | 0    | 0    | 0    | 0    | 0    | 0    | 0    |
| 0    | 0    | 0    | 0    | 0    | 0    | 0    | 0    | 0    | 0    | 0    | 0    | 0    | 0    | 0    | 0    | 0    | 0    | 0    | 0    | 0    |
| 0    | 0    | 0    | 0    | 0.01 | 0    | 0    | 0    | 0    | 0    | 0    | 0.01 | 0    | 0    | 0    | 0    | 0    | 0.01 | 0    | 0    | 0    |
| 0    | 0    | 0    | 0    | 0    | 0    | 0    | 0    | 0    | 0    | 0    | 0    | 0    | 0    | 0    | 0    | 0    | 0    | 0    | 0    | 0    |
| 0    | 0    | 0    | 0    | 0    | 0    | 0    | 0    | 0    | 0    | 0    | 0    | 0    | 0    | 0    | 0    | 0    | 0    | 0    | 0    | 0    |
| 0    | 0    | 0    | 0    | 0    | 0    | 0    | 0    | 0    | 0    | 0    | 0    | 0    | 0    | 0    | 0    | 0    | 0    | 0    | 0    | 0    |
| 0    | 0    | 0    | 0    | 0    | 0    | 0    | 0    | 0    | 0    | 0    | 0    | 0    | 0    | 0    | 0    | 0    | 0    | 0    | 0    | 0    |
| 0    | 0    | 0    | 0    | 0    | 0    | 0    | 0    | 0    | 0    | 0    | 0    | 0    | 0    | 0    | 0    | 0    | 0    | 0    | 0    | 0    |
| 0    | 0    | 0    | 0    | 0    | 0    | 0    | 0    | 0    | 0    | 0    | 0    | 0    | 0    | 0    | 0    | 0    | 0    | 0    | 0    | 0    |
| 0    | 0    | 0    | 0    | 0    | 0    | 0    | 0    | 0    | 0    | 0    | 0    | 0    | 0    | 0    | 0    | 0    | 0    | 0    | 0    | 0    |
| 0    | 0.02 | 0.01 | 0.01 | 0.01 | 0.01 | 0.02 | 0.02 | 0    | 0.04 | 0.04 | 0.02 | 0.05 | 0.03 | 0.09 | 0    | 0.01 | 0.02 | 0    | 0    | 0    |
| 0    | 0    | 0    | 0    | 0    | 0    | 0    | 0    | 0    | 0    | 0    | 0    | 0    | 0    | 0    | 0    | 0    | 0    | 0    | 0    | 0    |
| 0    | 0    | 0    | 0    | 0    | 0    | 0    | 0    | 0    | 0    | 0    | 0    | 0    | 0    | 0    | 0    | 0    | 0    | 0    | 0    | 0    |
| 0    | 0    | 0    | 0    | 0    | 0    | 0    | 0    | 0    | 0    | 0    | 0    | 0    | 0    | 0    | 0    | 0    | 0    | 0    | 0    | 0    |
| 0    | 0    | 0.01 | 0.02 | 0    | 0    | 0    | 0    | 0    | 0.01 | 0.01 | 0    | 0    | 0    | 0    | 0    | 0.01 | 0    | 0    | 0    | 0    |
| 0    | 0    | 0    | 0    | 0    | 0    | 0    | 0    | 0    | 0.01 | 0    | 0.01 | 0    | 0    | 0    | 0.01 | 0    | 0    | 0    | 0    | 0    |
| 0    | 0    | 0    | 0    | 0    | 0    | 0    | 0    | 0    | 0    | 0    | 0    | 0    | 0    | 0    | 0    | 0    | 0    | 0    | 0    | 0    |
| 0    | 0    | 0    | 0    | 0    | 0    | 0    | 0    | 0    | 0    | 0    | 0    | 0    | 0    | 0    | 0    | 0    | 0    | 0    | 0    | 0    |
| 0    | 0.02 | 0.02 | 0.01 | 0.01 | 0.01 | 0    | 0.01 | 0    | 0.01 | 0.01 | 0.01 | 0    | 0.01 | 0.01 | 0    | 0    | 0.02 | 0    | 0    | 0    |
| 0    | 0.02 | 0    | 0    | 0    | 0.01 | 0.01 | 0    | 0    | 0.01 | 0.01 | 0.02 | 0    | 0    | 0    | 0    | 0    | 0.01 | 0    | 0    | 0    |
| 0    | 0.05 | 0.02 | 0.03 | 0.01 | 0.03 | 0.02 | 0.05 | 0    | 0.02 | 0.03 | 0.01 | 0.02 | 0.02 | 0.01 | 0    | 0    | 0.03 | 0    | 0    | 0    |
| 0    | 0    | 0.01 | 0.01 | 0    | 0    | 0    | 0    | 0    | 0    | 0    | 0    | 0    | 0    | 0    | 0    | 0    | 0    | 0.01 | 0    | 0    |
| 0.01 | 0.1  | 0.01 | 0.01 | 0.03 | 0.03 | 0.03 | 0.01 | 0    | 0.01 | 0.01 | 0.03 | 0    | 0.01 | 0    | 0    | 0.01 | 0.03 | 0    | 0.01 | 0.02 |

Feuille1

|      |      |      |      |      |      |      |      |      |      |      |      |      |      |      |      |      |      |      |      |      |
|------|------|------|------|------|------|------|------|------|------|------|------|------|------|------|------|------|------|------|------|------|
| 0.01 | 0    | 0.01 | 0    | 0.01 | 0    | 0.01 | 0    | 0    | 0    | 0.01 | 0    | 0    | 0.01 | 0    | 0    | 0.01 | 0.01 | 0    | 0    | 0.01 |
| 0.01 | 0.03 | 0.05 | 0.04 | 0.01 | 0.02 | 0    | 0.03 | 0.02 | 0.03 | 0.02 | 0.01 | 0.1  | 0.05 | 0.07 | 0    | 0    | 0    | 0    | 0    | 0    |
| 0    | 0.02 | 0.01 | 0    | 0.01 | 0.03 | 0.01 | 0.01 | 0    | 0.01 | 0    | 0.02 | 0.01 | 0.01 | 0.01 | 0    | 0    | 0.02 | 0    | 0    | 0    |
| 0    | 0    | 0    | 0    | 0    | 0    | 0    | 0    | 0    | 0.01 | 0.01 | 0    | 0    | 0    | 0    | 0    | 0.01 | 0    | 0    | 0    | 0    |
| 0    | 0    | 0.01 | 0.01 | 0    | 0    | 0    | 0    | 0    | 0.02 | 0.02 | 0    | 0.01 | 0.01 | 0.02 | 0    | 0    | 0    | 0    | 0    | 0    |
| 0    | 0    | 0    | 0    | 0    | 0    | 0    | 0    | 0    | 0    | 0    | 0    | 0    | 0    | 0    | 0.01 | 0    | 0    | 0    | 0    | 0    |
| 0    | 0    | 0    | 0    | 0    | 0    | 0    | 0    | 0    | 0    | 0    | 0    | 0    | 0    | 0    | 0    | 0    | 0    | 0    | 0    | 0    |
| 0    | 0    | 0    | 0    | 0    | 0    | 0    | 0    | 0    | 0    | 0    | 0    | 0    | 0    | 0    | 0    | 0    | 0    | 0    | 0    | 0    |
| 0    | 0    | 0    | 0    | 0    | 0    | 0    | 0    | 0    | 0    | 0    | 0    | 0    | 0    | 0    | 0    | 0    | 0    | 0    | 0    | 0    |
| 0    | 0    | 0    | 0    | 0    | 0    | 0    | 0    | 0    | 0    | 0    | 0    | 0    | 0    | 0    | 0    | 0    | 0    | 0    | 0    | 0    |
| 0.02 | 0    | 0.02 | 0.02 | 0.02 | 0.01 | 0.02 | 0    | 0.02 | 0.01 | 0.02 | 0.03 | 0.01 | 0.01 | 0.01 | 0    | 0    | 0.01 | 0    | 0    | 0    |
| 0.09 | 0    | 0.02 | 0.02 | 0    | 0.05 | 0.05 | 0.01 | 0.02 | 0.01 | 0.03 | 0    | 0.07 | 0.02 | 0.04 | 0    | 0    | 0    | 0.04 | 0.01 | 0    |
| 0.02 | 0    | 0    | 0    | 0    | 0.01 | 0.01 | 0    | 0    | 0    | 0    | 0    | 0    | 0    | 0    | 0    | 0    | 0    | 0.01 | 0    | 0    |
| 0    | 0    | 0    | 0    | 0    | 0    | 0    | 0    | 0    | 0    | 0    | 0    | 0    | 0    | 0    | 0    | 0    | 0    | 0    | 0    | 0    |
| 0    | 0    | 0.01 | 0    | 0    | 0    | 0    | 0    | 0    | 0    | 0    | 0    | 0    | 0    | 0    | 0    | 0    | 0    | 0    | 0    | 0    |
| 0    | 0    | 0    | 0    | 0    | 0    | 0    | 0    | 0    | 0    | 0    | 0    | 0    | 0    | 0    | 0    | 0    | 0    | 0.01 | 0    | 0    |
| 0    | 0    | 0    | 0    | 0    | 0    | 0    | 0    | 0    | 0    | 0    | 0    | 0    | 0    | 0    | 0    | 0    | 0    | 0    | 0    | 0    |
| 0    | 0    | 0    | 0    | 0    | 0    | 0    | 0    | 0    | 0    | 0    | 0    | 0    | 0    | 0    | 0.21 | 0.13 | 0    | 0    | 0    | 0    |
| 0    | 0    | 0    | 0    | 0    | 0    | 0    | 0    | 0    | 0    | 0    | 0    | 0    | 0    | 0    | 0.15 | 0.05 | 0    | 0    | 0    | 0    |
| 0    | 0    | 0    | 0    | 0    | 0    | 0    | 0    | 0    | 0    | 0    | 0    | 0    | 0    | 0    | 0.05 | 0.14 | 0    | 0    | 0    | 0    |
| 0    | 0    | 0    | 0    | 0    | 0    | 0    | 0    | 0    | 0    | 0    | 0    | 0    | 0    | 0    | 0.04 | 0.04 | 0    | 0    | 0    | 0    |
| 0    | 0    | 0    | 0    | 0    | 0.02 | 0    | 0.02 | 0    | 0.04 | 0.02 | 0.01 | 0    | 0    | 0    | 0    | 0    | 0    | 0    | 0    | 0    |
| 0    | 0    | 0.01 | 0.01 | 0    | 0    | 0    | 0    | 0    | 0    | 0    | 0    | 0    | 0    | 0    | 0    | 0    | 0    | 0    | 0    | 0    |
| 0    | 0.02 | 0    | 0.01 | 0    | 0.01 | 0    | 0    | 0    | 0.01 | 0.01 | 0.01 | 0    | 0    | 0    | 0    | 0.01 | 0    | 0    | 0    | 0    |
| 0    | 0    | 0.01 | 0.01 | 0.01 | 0.02 | 0.03 | 0.06 | 0    | 0.01 | 0.01 | 0.01 | 0    | 0    | 0    | 0    | 0.01 | 0.01 | 0    | 0.01 | 0    |
| 0.02 | 0    | 0.01 | 0.01 | 0    | 0.01 | 0    | 0    | 0    | 0.01 | 0.01 | 0    | 0    | 0    | 0    | 0    | 0.02 | 0    | 0    | 0.03 | 0.02 |
| 0    | 0    | 0.01 | 0    | 0    | 0    | 0    | 0    | 0    | 0.01 | 0    | 0    | 0    | 0    | 0    | 0    | 0    | 0    | 0    | 0    | 0    |
| 0.01 | 0    | 0    | 0    | 0    | 0    | 0    | 0    | 0.02 | 0    | 0.01 | 0    | 0    | 0    | 0.01 | 0    | 0    | 0    | 0.02 | 0.01 | 0.01 |
| 0    | 0    | 0.01 | 0.01 | 0.01 | 0    | 0    | 0    | 0    | 0    | 0    | 0    | 0    | 0    | 0    | 0    | 0    | 0.01 | 0    | 0    | 0    |
| 0    | 0    | 0    | 0    | 0    | 0    | 0    | 0    | 0    | 0    | 0    | 0    | 0    | 0    | 0    | 0    | 0    | 0    | 0    | 0    | 0    |
| 0    | 0    | 0    | 0    | 0    | 0    | 0    | 0    | 0    | 0    | 0    | 0    | 0    | 0    | 0    | 0    | 0    | 0    | 0    | 0    | 0    |
| 0    | 0    | 0    | 0    | 0    | 0    | 0    | 0    | 0    | 0    | 0    | 0    | 0    | 0    | 0    | 0    | 0    | 0    | 0    | 0    | 0    |
| 0    | 0    | 0    | 0    | 0    | 0    | 0    | 0    | 0    | 0    | 0    | 0    | 0    | 0    | 0    | 0    | 0    | 0    | 0    | 0    | 0    |
| 0    | 0    | 0    | 0    | 0    | 0    | 0    | 0    | 0    | 0    | 0    | 0    | 0    | 0    | 0    | 0    | 0    | 0    | 0    | 0    | 0    |
| 0    | 0    | 0    | 0    | 0    | 0    | 0    | 0    | 0    | 0    | 0    | 0    | 0    | 0    | 0    | 0    | 0    | 0    | 0    | 0    | 0    |
| 0    | 0    | 0    | 0    | 0    | 0    | 0    | 0    | 0    | 0    | 0    | 0    | 0    | 0    | 0    | 0    | 0    | 0    | 0    | 0    | 0    |
| 0    | 0    | 0    | 0    | 0    | 0    | 0    | 0    | 0    | 0    | 0    | 0    | 0    | 0    | 0    | 0    | 0.01 | 0    | 0    | 0    | 0    |
| 0    | 0    | 0    | 0    | 0    | 0    | 0    | 0    | 0    | 0    | 0    | 0    | 0    | 0    | 0    | 0    | 0    | 0    | 0    | 0    | 0    |























Feuille1

|   |      |      |      |      |      |      |      |      |      |      |      |      |      |      |      |      |      |      |      |      |
|---|------|------|------|------|------|------|------|------|------|------|------|------|------|------|------|------|------|------|------|------|
| 0 | 0    | 0    | 0    | 0    | 0    | 0    | 0    | 0    | 0    | 0    | 0    | 0    | 0    | 0    | 0    | 0    | 0    | 0    | 0    |      |
| 0 | 0    | 0    | 0    | 0    | 0    | 0    | 0    | 0    | 0    | 0    | 0    | 0    | 0    | 0    | 0    | 0    | 0    | 0    | 0    |      |
| 0 | 0    | 0    | 0    | 0    | 0    | 0    | 0    | 0    | 0    | 0    | 0    | 0    | 0    | 0    | 0    | 0    | 0    | 0    | 0    |      |
| 0 | 0    | 0    | 0    | 0    | 0    | 0    | 0    | 0    | 0    | 0    | 0    | 0    | 0    | 0    | 0    | 0    | 0    | 0    | 0    |      |
| 0 | 0    | 0    | 0    | 0    | 0    | 0    | 0    | 0.01 | 0    | 0    | 0    | 0    | 0    | 0    | 0    | 0.01 | 0    | 0.01 | 0    |      |
| 0 | 0    | 0.01 | 0.01 | 0.01 | 0    | 0    | 0    | 0.02 | 0    | 0.01 | 0    | 0    | 0    | 0    | 0    | 0    | 0.01 | 0.02 | 0.01 | 0.01 |
| 0 | 0    | 0    | 0    | 0    | 0    | 0    | 0    | 0    | 0    | 0    | 0    | 0    | 0    | 0    | 0    | 0    | 0    | 0    | 0    | 0    |
| 0 | 0.02 | 0.01 | 0.01 | 0    | 0    | 0    | 0    | 0.02 | 0    | 0    | 0    | 0    | 0    | 0    | 0.01 | 0    | 0    | 0.01 | 0    | 0    |
| 0 | 0    | 0    | 0    | 0    | 0    | 0    | 0    | 0    | 0    | 0    | 0    | 0    | 0    | 0    | 0    | 0    | 0    | 0    | 0    | 0    |
| 0 | 0    | 0    | 0    | 0    | 0.01 | 0.01 | 0    | 0.02 | 0    | 0    | 0    | 0    | 0    | 0    | 0    | 0.01 | 0    | 0.01 | 0    | 0    |
| 0 | 0    | 0    | 0    | 0    | 0    | 0    | 0    | 0    | 0    | 0    | 0    | 0    | 0    | 0    | 0    | 0    | 0    | 0    | 0    | 0    |
| 0 | 0    | 0    | 0    | 0.05 | 0    | 0.05 | 0    | 0    | 0.01 | 0.01 | 0.03 | 0    | 0    | 0    | 0    | 0    | 0.02 | 0    | 0    | 0    |
| 0 | 0.02 | 0.02 | 0.01 | 0.02 | 0.01 | 0.01 | 0.01 | 0    | 0.01 | 0.01 | 0.01 | 0.01 | 0.01 | 0.01 | 0    | 0.01 | 0.02 | 0    | 0    | 0    |

Feuille1

| miR_T-miR_T-miR_T-miR_T-miR_T-miR_T-miR_T-miR_T-miR_T-miR_T-miR_T-miR_T-miR_T-miR_T-miR_T-miR_T-miR_T-miR_TemiR_TemiR_TemiR_Te |      |      |      |      |      |      |      |      |      |      |      |      |      |      |      |      |      |      |      |      |
|--------------------------------------------------------------------------------------------------------------------------------|------|------|------|------|------|------|------|------|------|------|------|------|------|------|------|------|------|------|------|------|
| 0.01                                                                                                                           | 0.02 | 0.02 | 0.01 | 0.05 | 0.01 | 0.04 | 0.03 | 0.03 | 0.03 | 0.04 | 0    | 0.01 | 0.01 | 0.01 | 0.04 | 0.01 | 0    | 0    | 0    | 0.04 |
| 0.04                                                                                                                           | 0.01 | 0.04 | 0.05 | 0.02 | 0.02 | 0.01 | 0.01 | 0.02 | 0.01 | 0.01 | 0    | 0.01 | 0.01 | 0    | 0.02 | 0    | 0    | 0    | 0    | 0.09 |
| 0.02                                                                                                                           | 0    | 0.02 | 0.03 | 0.01 | 0.01 | 0    | 0    | 0    | 0    | 0    | 0    | 0.02 | 0.01 | 0    | 0    | 0    | 0    | 0    | 0    | 0.02 |
| 0.01                                                                                                                           | 0    | 0    | 0    | 0    | 0    | 0    | 0    | 0.01 | 0.01 | 0.01 | 0    | 0    | 0    | 0    | 0    | 0    | 0    | 0    | 0    | 0    |
| 0                                                                                                                              | 0    | 0    | 0    | 0    | 0    | 0    | 0    | 0    | 0    | 0    | 0    | 0    | 0    | 0    | 0    | 0    | 0    | 0    | 0    | 0    |
| 0                                                                                                                              | 0    | 0    | 0    | 0.01 | 0.01 | 0.01 | 0.01 | 0.03 | 0.02 | 0.03 | 0    | 0.01 | 0    | 0    | 0.03 | 0    | 0    | 0    | 0    | 0.01 |
| 0                                                                                                                              | 0    | 0    | 0    | 0    | 0    | 0.01 | 0.01 | 0.01 | 0.01 | 0    | 0    | 0    | 0    | 0.01 | 0.01 | 0.01 | 0    | 0    | 0    | 0    |
| 0.01                                                                                                                           | 0    | 0.01 | 0    | 0    | 0    | 0.01 | 0    | 0.01 | 0.01 | 0.02 | 0    | 0.01 | 0    | 0    | 0.01 | 0    | 0    | 0    | 0    | 0    |
| 0                                                                                                                              | 0    | 0    | 0    | 0    | 0    | 0    | 0    | 0    | 0    | 0    | 0    | 0    | 0    | 0    | 0    | 0    | 0    | 0    | 0    | 0    |
| 0                                                                                                                              | 0    | 0    | 0    | 0    | 0    | 0    | 0    | 0    | 0    | 0    | 0    | 0    | 0    | 0    | 0    | 0    | 0    | 0    | 0    | 0    |
| 0                                                                                                                              | 0    | 0    | 0    | 0    | 0    | 0    | 0    | 0    | 0    | 0    | 0    | 0    | 0    | 0    | 0    | 0    | 0    | 0    | 0    | 0    |
| 0                                                                                                                              | 0    | 0    | 0    | 0    | 0    | 0    | 0    | 0    | 0    | 0    | 0    | 0    | 0    | 0    | 0    | 0    | 0    | 0    | 0    | 0    |
| 0                                                                                                                              | 0    | 0    | 0    | 0    | 0.01 | 0.02 | 0.01 | 0    | 0    | 0.01 | 0    | 0    | 0    | 0.01 | 0.01 | 0    | 0    | 0    | 0    | 0    |
| 0                                                                                                                              | 0    | 0    | 0.01 | 0    | 0    | 0    | 0    | 0    | 0    | 0    | 0    | 0    | 0    | 0    | 0    | 0    | 0    | 0.01 | 0    | 0    |
| 0                                                                                                                              | 0    | 0    | 0    | 0    | 0    | 0    | 0    | 0    | 0    | 0    | 0    | 0    | 0    | 0    | 0    | 0    | 0    | 0    | 0    | 0    |
| 0                                                                                                                              | 0    | 0    | 0    | 0    | 0    | 0    | 0    | 0    | 0    | 0.01 | 0    | 0    | 0    | 0    | 0    | 0    | 0    | 0    | 0.01 | 0    |
| 0                                                                                                                              | 0    | 0.01 | 0    | 0    | 0.01 | 0    | 0    | 0.01 | 0.01 | 0.01 | 0.01 | 0    | 0    | 0    | 0    | 0.01 | 0    | 0    | 0.01 | 0    |
| 0                                                                                                                              | 0    | 0    | 0    | 0    | 0    | 0    | 0    | 0    | 0    | 0    | 0    | 0    | 0    | 0    | 0    | 0    | 0    | 0    | 0    | 0    |
| 0                                                                                                                              | 0    | 0    | 0    | 0    | 0    | 0    | 0    | 0    | 0    | 0    | 0    | 0    | 0    | 0    | 0    | 0    | 0    | 0    | 0    | 0    |
| 0                                                                                                                              | 0    | 0    | 0    | 0    | 0    | 0    | 0    | 0    | 0    | 0    | 0    | 0    | 0    | 0    | 0    | 0    | 0    | 0    | 0    | 0    |
| 0                                                                                                                              | 0    | 0    | 0    | 0    | 0    | 0    | 0    | 0    | 0    | 0    | 0    | 0    | 0    | 0    | 0    | 0    | 0    | 0    | 0    | 0    |
| 0.05                                                                                                                           | 0    | 0.04 | 0.05 | 0    | 0    | 0    | 0    | 0    | 0    | 0    | 0    | 0    | 0    | 0    | 0    | 0.06 | 0    | 0    | 0    | 0    |
| 0                                                                                                                              | 0    | 0    | 0    | 0    | 0    | 0    | 0    | 0    | 0    | 0    | 0.01 | 0    | 0    | 0    | 0    | 0    | 0.01 | 0.01 | 0    | 0    |
| 0                                                                                                                              | 0    | 0    | 0    | 0    | 0    | 0    | 0    | 0    | 0    | 0    | 0    | 0    | 0    | 0    | 0    | 0    | 0    | 0    | 0    | 0    |
| 0                                                                                                                              | 0    | 0.01 | 0.01 | 0    | 0    | 0    | 0    | 0    | 0    | 0    | 0    | 0    | 0    | 0    | 0    | 0    | 0    | 0    | 0    | 0    |
| 0.02                                                                                                                           | 0    | 0.02 | 0.02 | 0    | 0.01 | 0    | 0    | 0    | 0    | 0    | 0    | 0    | 0    | 0    | 0    | 0    | 0    | 0    | 0    | 0.03 |
| 0.01                                                                                                                           | 0.05 | 0.01 | 0    | 0    | 0.02 | 0    | 0    | 0.02 | 0.01 | 0.02 | 0.04 | 0    | 0    | 0    | 0    | 0    | 0.01 | 0    | 0    | 0.13 |
| 0                                                                                                                              | 0    | 0    | 0    | 0    | 0    | 0    | 0    | 0    | 0    | 0    | 0    | 0    | 0    | 0    | 0    | 0    | 0    | 0    | 0    | 0    |
| 0                                                                                                                              | 0    | 0    | 0    | 0    | 0    | 0    | 0    | 0    | 0    | 0    | 0    | 0    | 0    | 0    | 0    | 0    | 0    | 0    | 0    | 0    |
| 0                                                                                                                              | 0    | 0    | 0    | 0    | 0    | 0    | 0    | 0    | 0    | 0    | 0    | 0    | 0    | 0    | 0    | 0    | 0    | 0    | 0    | 0    |
| 0                                                                                                                              | 0    | 0    | 0    | 0    | 0    | 0    | 0    | 0    | 0    | 0    | 0    | 0    | 0    | 0    | 0    | 0    | 0    | 0    | 0    | 0    |
| 0                                                                                                                              | 0    | 0    | 0    | 0    | 0    | 0    | 0    | 0    | 0    | 0    | 0    | 0    | 0    | 0    | 0    | 0    | 0    | 0    | 0    | 0    |
| 0                                                                                                                              | 0    | 0    | 0    | 0    | 0    | 0    | 0    | 0    | 0    | 0    | 0    | 0    | 0    | 0    | 0    | 0    | 0    | 0    | 0    | 0    |
| 0                                                                                                                              | 0    | 0    | 0    | 0    | 0    | 0    | 0    | 0    | 0    | 0    | 0    | 0    | 0    | 0    | 0    | 0    | 0    | 0    | 0    | 0    |
| 0.02                                                                                                                           | 0.01 | 0.02 | 0.02 | 0.01 | 0.01 | 0    | 0    | 0    | 0    | 0    | 0    | 0    | 0    | 0    | 0    | 0    | 0.04 | 0.03 | 0.03 | 0    |
| 0                                                                                                                              | 0    | 0    | 0    | 0    | 0    | 0    | 0    | 0    | 0    | 0    | 0    | 0    | 0    | 0    | 0    | 0    | 0.01 | 0    | 0    | 0    |



Feuille1

|      |      |      |      |      |      |      |      |      |      |      |      |      |      |      |      |      |      |      |      |      |
|------|------|------|------|------|------|------|------|------|------|------|------|------|------|------|------|------|------|------|------|------|
| 0.22 | 0.27 | 0.14 | 0.16 | 0.08 | 0.05 | 0.03 | 0.03 | 0.14 | 0.17 | 0.1  | 0.19 | 0.07 | 0.08 | 0.07 | 0.04 | 0.05 | 0.1  | 0.05 | 0.08 | 0.09 |
| 0    | 0    | 0.01 | 0    | 0.01 | 0.02 | 0    | 0    | 0.01 | 0.02 | 0.01 | 0    | 0    | 0.01 | 0    | 0    | 0    | 0.03 | 0.02 | 0.01 | 0    |
| 0    | 0    | 0    | 0    | 0.03 | 0    | 0.01 | 0    | 0.07 | 0.06 | 0.02 | 0.01 | 0    | 0    | 0.01 | 0    | 0    | 0    | 0    | 0    | 0.01 |
| 0    | 0    | 0    | 0    | 0    | 0    | 0    | 0    | 0.01 | 0    | 0.01 | 0    | 0    | 0    | 0    | 0    | 0    | 0    | 0    | 0    | 0    |
| 0    | 0    | 0    | 0    | 0    | 0    | 0    | 0    | 0    | 0    | 0    | 0    | 0.01 | 0    | 0    | 0    | 0    | 0    | 0    | 0    | 0    |
| 0    | 0    | 0    | 0    | 0    | 0    | 0    | 0    | 0    | 0    | 0    | 0    | 0    | 0    | 0    | 0    | 0    | 0    | 0    | 0    | 0    |
| 0    | 0    | 0    | 0    | 0    | 0    | 0    | 0    | 0    | 0    | 0.01 | 0    | 0    | 0    | 0    | 0    | 0    | 0    | 0.01 | 0    | 0    |
| 0    | 0    | 0    | 0    | 0    | 0    | 0    | 0    | 0    | 0    | 0    | 0    | 0    | 0    | 0    | 0    | 0    | 0    | 0    | 0    | 0    |
| 0    | 0    | 0    | 0    | 0    | 0    | 0    | 0    | 0    | 0    | 0    | 0    | 0    | 0    | 0    | 0    | 0    | 0    | 0.01 | 0    | 0    |
| 0    | 0    | 0    | 0    | 0    | 0    | 0    | 0    | 0    | 0    | 0    | 0    | 0    | 0    | 0    | 0    | 0    | 0    | 0    | 0    | 0    |
| 0    | 0    | 0    | 0    | 0    | 0    | 0    | 0    | 0    | 0    | 0    | 0    | 0    | 0    | 0.01 | 0    | 0    | 0.02 | 0.01 | 0    | 0    |
| 0    | 0    | 0    | 0    | 0    | 0    | 0    | 0    | 0    | 0    | 0    | 0    | 0    | 0    | 0    | 0    | 0    | 0    | 0    | 0    | 0    |
| 0    | 0    | 0    | 0    | 0    | 0    | 0    | 0    | 0    | 0    | 0    | 0    | 0    | 0    | 0    | 0    | 0    | 0    | 0    | 0    | 0    |
| 0    | 0.01 | 0    | 0    | 0    | 0    | 0    | 0    | 0.01 | 0.01 | 0    | 0    | 0    | 0    | 0    | 0    | 0    | 0.01 | 0.01 | 0.01 | 0    |
| 0    | 0    | 0    | 0    | 0    | 0    | 0    | 0    | 0    | 0    | 0.02 | 0    | 0    | 0    | 0    | 0    | 0    | 0    | 0    | 0    | 0    |
| 0    | 0    | 0    | 0    | 0    | 0    | 0    | 0    | 0    | 0    | 0    | 0    | 0    | 0    | 0    | 0    | 0    | 0    | 0    | 0    | 0    |
| 0    | 0    | 0    | 0    | 0    | 0    | 0    | 0    | 0    | 0    | 0    | 0    | 0    | 0    | 0    | 0    | 0    | 0    | 0    | 0    | 0    |
| 0.02 | 0    | 0.01 | 0.02 | 0.01 | 0.02 | 0    | 0.01 | 0.01 | 0.01 | 0    | 0.01 | 0    | 0    | 0    | 0.01 | 0    | 0    | 0    | 0    | 0    |
| 0    | 0    | 0    | 0    | 0    | 0    | 0    | 0    | 0    | 0    | 0    | 0    | 0    | 0    | 0    | 0    | 0    | 0    | 0    | 0    | 0    |
| 0    | 0    | 0    | 0    | 0    | 0    | 0    | 0    | 0    | 0    | 0    | 0    | 0    | 0    | 0    | 0    | 0    | 0    | 0    | 0    | 0    |
| 0    | 0    | 0    | 0    | 0    | 0    | 0    | 0    | 0    | 0    | 0    | 0    | 0    | 0    | 0    | 0    | 0    | 0    | 0    | 0    | 0    |
| 0    | 0    | 0    | 0    | 0    | 0    | 0    | 0    | 0    | 0    | 0    | 0    | 0    | 0    | 0    | 0    | 0    | 0    | 0    | 0    | 0    |
| 0    | 0    | 0    | 0    | 0    | 0.02 | 0    | 0    | 0    | 0    | 0    | 0    | 0    | 0    | 0    | 0    | 0    | 0    | 0    | 0    | 0    |
| 0    | 0    | 0.01 | 0    | 0    | 0    | 0    | 0    | 0    | 0    | 0    | 0    | 0    | 0    | 0    | 0    | 0    | 0    | 0    | 0    | 0.01 |
| 0    | 0    | 0    | 0    | 0    | 0    | 0    | 0    | 0    | 0    | 0    | 0    | 0    | 0    | 0    | 0    | 0    | 0    | 0    | 0    | 0    |
| 0    | 0    | 0    | 0    | 0    | 0    | 0    | 0    | 0    | 0    | 0    | 0    | 0    | 0    | 0    | 0    | 0    | 0.01 | 0    | 0    | 0    |
| 0    | 0    | 0    | 0    | 0    | 0    | 0    | 0    | 0    | 0    | 0    | 0    | 0    | 0    | 0    | 0    | 0    | 0    | 0    | 0    | 0    |
| 0    | 0    | 0    | 0    | 0    | 0    | 0    | 0    | 0    | 0    | 0    | 0    | 0    | 0    | 0    | 0    | 0    | 0    | 0    | 0    | 0    |
| 0    | 0    | 0    | 0    | 0    | 0    | 0    | 0    | 0    | 0    | 0    | 0    | 0    | 0    | 0    | 0    | 0    | 0    | 0    | 0    | 0    |
| 0    | 0    | 0    | 0    | 0    | 0    | 0    | 0    | 0    | 0    | 0    | 0    | 0    | 0    | 0    | 0    | 0    | 0    | 0    | 0    | 0    |
| 0    | 0    | 0    | 0    | 0    | 0    | 0    | 0    | 0    | 0    | 0    | 0    | 0    | 0    | 0    | 0    | 0    | 0    | 0    | 0    | 0    |
| 0    | 0    | 0    | 0    | 0    | 0    | 0    | 0    | 0    | 0    | 0    | 0    | 0    | 0    | 0    | 0    | 0    | 0    | 0    | 0    | 0    |
| 0    | 0    | 0    | 0    | 0    | 0    | 0    | 0    | 0.01 | 0.01 | 0    | 0    | 0    | 0    | 0    | 0    | 0    | 0    | 0.01 | 0.01 | 0    |
| 0    | 0    | 0    | 0    | 0.01 | 0.01 | 0    | 0.01 | 0.01 | 0.02 | 0.02 | 0    | 0    | 0    | 0    | 0    | 0.02 | 0    | 0.03 | 0.02 | 0    |
| 0    | 0    | 0    | 0    | 0    | 0    | 0    | 0    | 0    | 0    | 0    | 0    | 0    | 0    | 0    | 0    | 0    | 0    | 0    | 0    | 0    |

Feuille1

|      |      |      |      |      |      |      |      |      |      |      |      |      |      |      |      |   |      |      |      |      |      |
|------|------|------|------|------|------|------|------|------|------|------|------|------|------|------|------|---|------|------|------|------|------|
| 0    | 0    | 0    | 0    | 0    | 0    | 0    | 0    | 0    | 0    | 0    | 0    | 0    | 0    | 0    | 0    | 0 | 0    | 0    | 0    | 0    |      |
| 0    | 0    | 0    | 0    | 0    | 0    | 0    | 0    | 0    | 0    | 0    | 0    | 0    | 0    | 0    | 0    | 0 | 0    | 0    | 0.03 | 0    | 0    |
| 0    | 0    | 0    | 0    | 0    | 0    | 0    | 0    | 0    | 0    | 0    | 0    | 0    | 0    | 0    | 0    | 0 | 0    | 0    | 0    | 0    | 0.02 |
| 0    | 0    | 0    | 0    | 0    | 0    | 0    | 0    | 0    | 0    | 0    | 0    | 0    | 0    | 0    | 0    | 0 | 0    | 0    | 0    | 0    | 0    |
| 0    | 0    | 0    | 0    | 0    | 0    | 0    | 0    | 0    | 0    | 0    | 0    | 0    | 0    | 0    | 0    | 0 | 0    | 0    | 0    | 0    | 0    |
| 0    | 0    | 0    | 0    | 0    | 0    | 0    | 0    | 0    | 0    | 0    | 0    | 0    | 0    | 0    | 0    | 0 | 0    | 0    | 0    | 0    | 0    |
| 0    | 0    | 0    | 0    | 0    | 0    | 0    | 0    | 0    | 0    | 0    | 0    | 0    | 0    | 0    | 0    | 0 | 0    | 0    | 0.01 | 0    | 0    |
| 0    | 0    | 0    | 0    | 0    | 0    | 0    | 0    | 0    | 0    | 0    | 0    | 0    | 0    | 0    | 0    | 0 | 0    | 0    | 0    | 0    | 0    |
| 0    | 0    | 0    | 0    | 0    | 0    | 0    | 0    | 0    | 0    | 0    | 0    | 0    | 0    | 0    | 0    | 0 | 0    | 0    | 0    | 0    | 0    |
| 0    | 0.01 | 0    | 0    | 0    | 0    | 0    | 0    | 0    | 0.01 | 0.01 | 0.01 | 0    | 0    | 0    | 0    | 0 | 0    | 0    | 0.01 | 0.01 | 0    |
| 0    | 0    | 0    | 0    | 0    | 0    | 0    | 0    | 0    | 0    | 0    | 0.01 | 0    | 0    | 0    | 0    | 0 | 0    | 0    | 0    | 0    | 0    |
| 0.02 | 0.01 | 0.01 | 0.02 | 0.04 | 0.14 | 0.04 | 0.04 | 0    | 0.01 | 0    | 0.04 | 0.04 | 0.01 | 0.02 | 0.03 | 0 | 0    | 0.09 | 0.04 | 0    | 0    |
| 0    | 0    | 0    | 0    | 0    | 0    | 0    | 0    | 0.02 | 0.01 | 0    | 0    | 0    | 0    | 0    | 0    | 0 | 0    | 0    | 0    | 0    | 0    |
| 0    | 0    | 0    | 0    | 0    | 0    | 0    | 0    | 0    | 0    | 0    | 0    | 0    | 0    | 0    | 0    | 0 | 0    | 0    | 0    | 0    | 0    |
| 0    | 0    | 0    | 0    | 0    | 0    | 0    | 0    | 0    | 0    | 0    | 0    | 0    | 0    | 0    | 0    | 0 | 0    | 0    | 0    | 0    | 0    |
| 0    | 0    | 0    | 0    | 0    | 0    | 0    | 0    | 0    | 0    | 0    | 0    | 0    | 0    | 0    | 0    | 0 | 0    | 0    | 0    | 0    | 0.01 |
| 0    | 0    | 0    | 0    | 0    | 0    | 0    | 0    | 0    | 0    | 0    | 0    | 0    | 0    | 0    | 0    | 0 | 0    | 0    | 0    | 0    | 0    |
| 0    | 0    | 0    | 0    | 0    | 0    | 0    | 0    | 0    | 0    | 0    | 0    | 0    | 0    | 0    | 0    | 0 | 0    | 0    | 0    | 0    | 0    |
| 0    | 0    | 0    | 0    | 0    | 0    | 0    | 0    | 0    | 0    | 0    | 0    | 0    | 0    | 0    | 0    | 0 | 0    | 0    | 0    | 0    | 0    |
| 0    | 0    | 0    | 0    | 0    | 0    | 0    | 0    | 0    | 0    | 0    | 0    | 0    | 0    | 0    | 0    | 0 | 0    | 0    | 0    | 0    | 0    |
| 0    | 0    | 0    | 0    | 0    | 0    | 0    | 0    | 0    | 0    | 0    | 0    | 0    | 0    | 0    | 0    | 0 | 0    | 0    | 0    | 0    | 0    |
| 0    | 0    | 0    | 0    | 0    | 0    | 0    | 0    | 0    | 0    | 0    | 0    | 0    | 0    | 0    | 0    | 0 | 0    | 0    | 0    | 0    | 0    |
| 0    | 0    | 0    | 0    | 0    | 0    | 0    | 0    | 0    | 0    | 0    | 0    | 0    | 0    | 0    | 0    | 0 | 0    | 0    | 0    | 0    | 0    |
| 0.02 | 0    | 0.02 | 0.03 | 0.01 | 0.01 | 0    | 0.01 | 0    | 0    | 0    | 0    | 0    | 0    | 0    | 0.01 | 0 | 0    | 0    | 0.02 | 0    | 0.02 |
| 0    | 0    | 0    | 0    | 0    | 0    | 0    | 0    | 0    | 0    | 0    | 0    | 0    | 0    | 0    | 0    | 0 | 0    | 0    | 0    | 0    | 0    |
| 0    | 0    | 0    | 0    | 0    | 0    | 0    | 0    | 0    | 0    | 0    | 0    | 0    | 0    | 0    | 0    | 0 | 0    | 0    | 0    | 0    | 0    |
| 0    | 0    | 0    | 0    | 0    | 0    | 0    | 0    | 0    | 0    | 0    | 0    | 0    | 0    | 0    | 0    | 0 | 0    | 0    | 0    | 0    | 0    |
| 0    | 0    | 0    | 0    | 0    | 0    | 0    | 0    | 0    | 0    | 0    | 0    | 0    | 0    | 0    | 0    | 0 | 0    | 0    | 0    | 0    | 0    |
| 0    | 0    | 0    | 0    | 0    | 0    | 0    | 0    | 0    | 0    | 0    | 0.02 | 0    | 0    | 0    | 0    | 0 | 0    | 0    | 0    | 0    | 0    |
| 0    | 0    | 0    | 0    | 0    | 0    | 0    | 0    | 0    | 0    | 0    | 0    | 0    | 0    | 0    | 0    | 0 | 0    | 0    | 0    | 0    | 0    |
| 0.01 | 0    | 0.01 | 0.01 | 0    | 0    | 0    | 0.01 | 0    | 0    | 0    | 0    | 0    | 0    | 0    | 0    | 0 | 0    | 0    | 0    | 0    | 0.01 |
| 0.01 | 0    | 0    | 0.01 | 0    | 0    | 0    | 0    | 0    | 0    | 0    | 0    | 0    | 0    | 0    | 0    | 0 | 0    | 0    | 0    | 0    | 0.01 |
| 0.02 | 0.01 | 0.03 | 0.04 | 0    | 0.02 | 0    | 0.01 | 0    | 0    | 0    | 0    | 0    | 0    | 0    | 0.01 | 0 | 0.01 | 0.01 | 0.01 | 0.01 | 0.01 |
| 0.01 | 0    | 0.01 | 0.01 | 0    | 0.01 | 0    | 0    | 0.01 | 0.01 | 0.02 | 0    | 0    | 0    | 0    | 0    | 0 | 0    | 0    | 0    | 0    | 0    |
| 0    | 0.02 | 0    | 0    | 0.01 | 0.01 | 0.02 | 0.03 | 0    | 0    | 0    | 0    | 0.01 | 0.01 | 0.02 | 0.04 | 0 | 0    | 0.01 | 0.01 | 0.01 | 0.01 |























Feuille1

|      |   |      |      |      |      |   |   |      |      |      |      |   |      |   |      |      |      |      |      |      |
|------|---|------|------|------|------|---|---|------|------|------|------|---|------|---|------|------|------|------|------|------|
| 0    | 0 | 0    | 0    | 0    | 0    | 0 | 0 | 0    | 0    | 0    | 0    | 0 | 0    | 0 | 0    | 0    | 0    | 0    | 0    | 0    |
| 0    | 0 | 0    | 0    | 0    | 0    | 0 | 0 | 0    | 0    | 0    | 0    | 0 | 0    | 0 | 0    | 0    | 0    | 0    | 0    | 0    |
| 0    | 0 | 0    | 0    | 0    | 0    | 0 | 0 | 0    | 0    | 0    | 0    | 0 | 0    | 0 | 0    | 0    | 0    | 0    | 0    | 0    |
| 0    | 0 | 0    | 0    | 0    | 0    | 0 | 0 | 0    | 0    | 0    | 0    | 0 | 0    | 0 | 0    | 0    | 0    | 0    | 0    | 0    |
| 0    | 0 | 0    | 0    | 0    | 0    | 0 | 0 | 0    | 0.01 | 0.01 | 0.01 | 0 | 0    | 0 | 0    | 0.02 | 0.02 | 0    | 0    | 0    |
| 0    | 0 | 0.01 | 0    | 0.01 | 0.01 | 0 | 0 | 0.02 | 0.02 | 0    | 0    | 0 | 0.01 | 0 | 0.01 | 0    | 0    | 0    | 0    | 0    |
| 0    | 0 | 0    | 0    | 0    | 0    | 0 | 0 | 0    | 0    | 0    | 0    | 0 | 0    | 0 | 0    | 0    | 0    | 0    | 0    | 0    |
| 0.01 | 0 | 0.01 | 0.01 | 0    | 0.01 | 0 | 0 | 0.01 | 0.01 | 0.01 | 0    | 0 | 0.01 | 0 | 0    | 0.01 | 0    | 0.01 | 0    | 0    |
| 0    | 0 | 0    | 0    | 0    | 0    | 0 | 0 | 0    | 0    | 0    | 0    | 0 | 0    | 0 | 0    | 0    | 0    | 0    | 0    | 0    |
| 0    | 0 | 0    | 0    | 0    | 0.01 | 0 | 0 | 0    | 0.01 | 0    | 0    | 0 | 0    | 0 | 0    | 0    | 0    | 0    | 0    | 0    |
| 0    | 0 | 0    | 0    | 0    | 0    | 0 | 0 | 0    | 0    | 0    | 0    | 0 | 0    | 0 | 0    | 0    | 0    | 0    | 0    | 0    |
| 0    | 0 | 0    | 0    | 0    | 0    | 0 | 0 | 0    | 0    | 0    | 0.01 | 0 | 0    | 0 | 0    | 0    | 0    | 0.01 | 0    | 0.01 |
| 0.11 | 0 | 0.09 | 0.1  | 0.01 | 0.02 | 0 | 0 | 0    | 0    | 0    | 0    | 0 | 0    | 0 | 0    | 0.01 | 0.01 | 0    | 0.01 | 0.01 |



Feuille1

| miR_Th | miR_U | miR_U | miR_U | miR_U | miR_U | miR_Stomach |
|--------|-------|-------|-------|-------|-------|-------------|
| 0.08   | 0.03  | 0.06  | 0.07  | 0.08  | 0.03  | 0.01        |
| 0.08   | 0.06  | 0.07  | 0.06  | 0.14  | 0.11  | 0.01        |
| 0.04   | 0.01  | 0     | 0.01  | 0.01  | 0.04  | 0           |
| 0      | 0     | 0     | 0.01  | 0     | 0     | 0           |
| 0.01   | 0     | 0.01  | 0.01  | 0.01  | 0     | 0           |
| 0.03   | 0.01  | 0.02  | 0.01  | 0.02  | 0.01  | 0.01        |
| 0.01   | 0     | 0     | 0     | 0     | 0     | 0.01        |
| 0.05   | 0.02  | 0     | 0.01  | 0.01  | 0.01  | 0           |
| 0      | 0     | 0     | 0     | 0     | 0     | 0           |
| 0.01   | 0     | 0.01  | 0.01  | 0     | 0     | 0           |
| 0      | 0     | 0     | 0     | 0     | 0     | 0           |
| 0      | 0     | 0     | 0     | 0.01  | 0     | 0           |
| 0      | 0     | 0     | 0     | 0     | 0     | 0           |
| 0      | 0     | 0     | 0     | 0     | 0     | 0           |
| 0      | 0     | 0     | 0     | 0     | 0     | 0           |
| 0      | 0     | 0     | 0     | 0     | 0     | 0           |
| 0      | 0     | 0     | 0     | 0     | 0     | 0           |
| 0      | 0     | 0     | 0     | 0     | 0     | 0           |
| 0      | 0     | 0     | 0     | 0     | 0     | 0           |
| 0      | 0     | 0     | 0     | 0     | 0     | 0           |
| 0      | 0     | 0     | 0     | 0     | 0     | 0           |
| 0.01   | 0     | 0     | 0     | 0     | 0     | 0           |
| 0      | 0     | 0     | 0     | 0     | 0     | 0           |
| 0      | 0     | 0     | 0     | 0     | 0     | 0           |
| 0      | 0     | 0     | 0     | 0     | 0     | #N/D        |
| 0.01   | 0     | 0     | 0     | 0     | 0     | 0           |
| 0.05   | 0.01  | 0.02  | 0.03  | 0.01  | 0.02  | 0           |
| 0.06   | 0     | 0     | 0     | 0     | 0.04  | 0           |
| 0      | 0     | 0     | 0     | 0     | 0     | #N/D        |
| 0      | 0     | 0     | 0     | 0     | 0     | 0           |
| 0      | 0     | 0     | 0     | 0     | 0     | 0           |
| 0      | 0     | 0     | 0     | 0     | 0     | 0           |
| 0      | 0     | 0     | 0     | 0     | 0     | 0           |
| 0      | 0     | 0     | 0     | 0     | 0     | 0           |
| 0      | 0     | 0     | 0     | 0     | 0     | 0           |
| 0      | 0     | 0     | 0     | 0     | 0     | 0           |
| 0      | 0     | 0     | 0     | 0     | 0     | 0           |
| 0      | 0.01  | 0.01  | 0     | 0     | 0.01  | 0           |
| 0      | 0     | 0     | 0     | 0     | 0     | 0           |

Feuille1

|      |      |      |      |      |      |      |
|------|------|------|------|------|------|------|
| 0    | 0    | 0    | 0    | 0    | 0    | 0    |
| 0    | 0    | 0    | 0    | 0    | 0    | 0    |
| 0    | 0    | 0    | 0    | 0    | 0    | 0    |
| 0    | 0    | 0    | 0    | 0    | 0    | 0    |
| 0    | 0    | 0    | 0    | 0    | 0    | 0    |
| 0    | 0    | 0    | 0    | 0    | 0    | 0    |
| 0    | 0.01 | 0.01 | 0.01 | 0    | 0    | 0    |
| 0    | 0    | 0    | 0    | 0    | 0    | 0    |
| 0.01 | 0    | 0    | 0    | 0    | 0    | 0    |
| 0    | 0    | 0    | 0    | 0    | 0    | 0    |
| 0    | 0    | 0    | 0    | 0    | 0    | 0    |
| 0    | 0    | 0    | 0    | 0    | 0    | 0.01 |
| 0    | 0.01 | 0.01 | 0.01 | 0.03 | 0    | 0    |
| 0    | 0    | 0    | 0    | 0    | 0    | 0.01 |
| 0    | 0.03 | 0.01 | 0.01 | 0    | 0    | 0    |
| 0    | 0.03 | 0.02 | 0.02 | 0    | 0    | 0    |
| 0.07 | 0.22 | 0.19 | 0.2  | 0.25 | 0.31 | 0.01 |
| 0    | 0    | 0    | 0    | 0    | 0    | 0    |
| 0.01 | 0.01 | 0    | 0    | 0    | 0.07 | 0.03 |
| 0    | 0.01 | 0    | 0    | 0    | 0    | 0    |
| 0    | 0    | 0    | 0    | 0    | 0    | 0    |
| 0    | 0    | 0    | 0    | 0    | 0    | 0    |
| 0    | 0    | 0    | 0    | 0    | 0    | 0    |
| 0    | 0    | 0    | 0    | 0    | 0    | 0    |
| 0    | 0    | 0    | 0    | 0    | 0    | 0.07 |
| 0    | 0    | 0    | 0    | 0    | 0    | 0    |
| 0    | 0    | 0    | 0    | 0    | 0    | 0    |
| 0    | 0    | 0    | 0    | 0    | 0    | 0    |
| 0    | 0    | 0    | 0    | 0    | 0    | 0    |
| 0    | 0    | 0    | 0    | 0    | 0    | 0    |
| 0    | 0    | 0    | 0    | 0    | 0.01 | 0    |
| 0    | 0    | 0    | 0    | 0    | 0    | 0    |
| 0    | 0    | 0    | 0    | 0    | 0    | 0    |
| 0    | 0    | 0    | 0    | 0    | 0    | 0    |
| 0.01 | 0.03 | 0.03 | 0.02 | 0.02 | 0    | 0    |
| 0    | 0    | 0    | 0.01 | 0    | 0    | 0    |



Feuille1

|      |      |      |      |      |      |      |
|------|------|------|------|------|------|------|
| 0    | 0    | 0    | 0    | 0    | 0    | 0.01 |
| 0.04 | 0    | 0    | 0    | 0    | 0    | 0.01 |
| 0    | 0    | 0    | 0    | 0    | 0    | 0    |
| 0    | 0    | 0    | 0    | 0    | 0    | 0    |
| 0    | 0    | 0    | 0    | 0    | 0    | 0    |
| 0    | 0    | 0    | 0    | 0    | 0    | 0    |
| 0    | 0    | 0    | 0    | 0    | 0    | 0    |
| 0    | 0    | 0    | 0    | 0    | 0    | 0    |
| 0    | 0    | 0    | 0    | 0    | 0    | 0    |
| 0    | 0    | 0    | 0    | 0    | 0    | 0    |
| 0    | 0    | 0    | 0    | 0    | 0    | 0    |
| 0.01 | 0.05 | 0.05 | 0.03 | 0.04 | 0.02 | 0.11 |
| 0    | 0    | 0    | 0    | 0    | 0    | 0    |
| 0    | 0    | 0    | 0    | 0    | 0    | 0    |
| 0    | 0    | 0    | 0    | 0    | 0    | 0    |
| 0    | 0    | 0    | 0    | 0    | 0    | 0    |
| 0    | 0    | 0    | 0    | 0    | 0    | 0    |
| 0    | 0    | 0    | 0    | 0    | 0    | 0    |
| 0    | 0    | 0    | 0    | 0    | 0    | 0    |
| 0    | 0    | 0    | 0    | 0    | 0    | 0    |
| 0    | 0    | 0    | 0    | 0    | 0    | 0    |
| 0    | 0    | 0    | 0    | 0    | 0    | 0    |
| 0    | 0    | 0    | 0    | 0    | 0    | 0    |
| 0    | 0    | 0    | 0    | 0    | 0    | 0    |
| 0    | 0    | 0    | 0    | 0    | 0    | 0    |
| 0    | 0    | 0    | 0    | 0    | 0    | 0    |
| 0    | 0    | 0    | 0    | 0    | 0    | 0    |
| 0    | 0    | 0    | 0    | 0    | 0    | 0    |
| 0    | 0.05 | 0.03 | 0.04 | 0.02 | 0.02 | 0    |
| 0    | 0    | 0    | 0    | 0    | 0    | 0    |
| 0    | 0    | 0    | 0    | 0    | 0    | 0    |
| 0    | 0    | 0    | 0    | 0    | 0    | 0    |
| 0    | 0    | 0    | 0.01 | 0    | 0    | 0    |
| 0    | 0.01 | 0.01 | 0    | 0    | 0    | 0    |
| 0    | 0    | 0    | 0    | 0    | 0    | 0.01 |
| 0    | 0    | 0    | 0    | 0    | 0    | 0    |
| 0.01 | 0.02 | 0.02 | 0.02 | 0.01 | 0.01 | 0.01 |
| 0.03 | 0    | 0    | 0    | 0.01 | 0.03 | 0.01 |
| 0.01 | 0.03 | 0.03 | 0.05 | 0.03 | 0.01 | 0.06 |
| 0.01 | 0    | 0    | 0    | 0    | 0    | 0    |
| 0.04 | 0.01 | 0.01 | 0.01 | 0.01 | 0.03 | 0.01 |























Feuille1

|      |      |      |      |   |      |      |
|------|------|------|------|---|------|------|
| 0    | 0    | 0    | 0    | 0 | 0    | 0    |
| 0    | 0    | 0    | 0    | 0 | 0    | 0    |
| 0    | 0    | 0    | 0    | 0 | 0    | 0    |
| 0    | 0    | 0    | 0    | 0 | 0    | 0    |
| 0    | 0.01 | 0    | 0    | 0 | 0    | 0    |
| 0    | 0    | 0    | 0    | 0 | 0    | 0.01 |
| 0    | 0    | 0    | 0    | 0 | 0    | 0    |
| 0    | 0    | 0    | 0    | 0 | 0    | 0.01 |
| 0    | 0    | 0    | 0    | 0 | 0    | 0    |
| 0    | 0    | 0    | 0    | 0 | 0    | 0    |
| 0    | 0    | 0    | 0    | 0 | 0    | 0    |
| 0.02 | 0    | 0    | 0    | 0 | 0.03 | 0    |
| 0.01 | 0    | 0.01 | 0.01 | 0 | 0    | 0    |

|            |      |       |      | Ref   |      |       |       |   |   |   |   |
|------------|------|-------|------|-------|------|-------|-------|---|---|---|---|
| hsa-21     | 9079 | 45620 | 0.49 | 10.8  | 9079 | 45620 | 0.109 | 0 | 0 | 0 | 0 |
| hsa-29c    | 4481 | 44413 | 0.47 | 10.52 | 4481 | 44413 | 0.106 | 0 | 0 | 0 | 0 |
| hsa-148a   | 5811 | 27265 | 0.29 | 6.46  | 5811 | 27265 | 0.065 | 0 | 0 | 0 | 0 |
| hsa-29a    | 4311 | 25271 | 0.27 | 5.98  | 4311 | 25271 | 0.060 | 0 | 0 | 0 | 0 |
| hsa-24     | 4884 | 24245 | 0.26 | 5.74  | 4884 | 24245 | 0.058 | 0 | 0 | 0 | 0 |
| hsa-29b    | 5624 | 20401 | 0.22 | 4.83  | 5624 | 20401 | 0.049 | 0 | 0 | 0 | 0 |
| hsa-1308   | 1162 | 18177 | 0.19 | 4.3   | 1162 | 18177 | 0.043 | 0 | 0 | 0 | 0 |
| hsa-192    | 3538 | 16507 | 0.18 | 3.91  | 3538 | 16507 | 0.039 | 0 | 0 | 0 | 0 |
| hsa-451    | 3667 | 15064 | 0.16 | 3.57  | 3667 | 15064 | 0.036 | 0 | 0 | 0 | 0 |
| hsa-145    | 2385 | 12109 | 0.13 | 2.87  | 2385 | 12109 | 0.029 | 0 | 0 | 0 | 0 |
| hsa-31     | 3522 | 11947 | 0.13 | 2.83  | 3522 | 11947 | 0.029 | 0 | 0 | 0 | 0 |
| hsa-200a   | 2341 | 9777  | 0.1  | 2.32  | 2341 | 9777  | 0.023 | 0 | 0 | 0 | 0 |
| hsa-19b    | 1863 | 8716  | 0.09 | 2.06  | 1863 | 8716  | 0.021 | 0 | 0 | 0 | 0 |
| hsa-26a    | 2326 | 6257  | 0.07 | 1.48  | 2326 | 6257  | 0.015 | 0 | 0 | 0 | 0 |
| hsa-200b   | 1739 | 5883  | 0.06 | 1.39  | 1739 | 5883  | 0.014 | 0 | 0 | 0 | 0 |
| hsa-let-7b | 2487 | 5326  | 0.06 | 1.26  | 2487 | 5326  | 0.013 | 0 | 0 | 0 | 0 |
| hsa-143    | 1792 | 4672  | 0.05 | 1.11  | 1792 | 4672  | 0.011 | 0 | 0 | 0 | 0 |
| hsa-191    | 1262 | 4514  | 0.05 | 1.07  | 1262 | 4514  | 0.011 | 0 | 0 | 0 | 0 |
| hsa-let-7f | 1619 | 3972  | 0.04 | 0.94  | 1619 | 3972  | 0.009 | 0 | 0 | 0 | 0 |
| hsa-23b    | 556  | 3846  | 0.04 | 0.91  | 556  | 3846  | 0.009 | 0 | 0 | 0 | 0 |
| hsa-378    | 1640 | 3753  | 0.04 | 0.89  | 1640 | 3753  | 0.009 | 0 | 0 | 0 | 0 |
| hsa-141    | 920  | 3127  | 0.03 | 0.74  | 920  | 3127  | 0.007 | 0 | 0 | 0 | 0 |
| hsa-199b   | 1294 | 3127  | 0.03 | 0.74  | 1294 | 3127  | 0.007 | 0 | 0 | 0 | 0 |
| hsa-17     | 1081 | 2997  | 0.03 | 0.71  | 1081 | 2997  | 0.007 | 0 | 0 | 0 | 0 |
| hsa-375    | 1612 | 2928  | 0.03 | 0.69  | 1612 | 2928  | 0.007 | 0 | 0 | 0 | 0 |
| hsa-93     | 1214 | 2748  | 0.03 | 0.65  | 1214 | 2748  | 0.007 | 0 | 0 | 0 | 0 |
| hsa-30b    | 662  | 2724  | 0.03 | 0.65  | 662  | 2724  | 0.007 | 0 | 0 | 0 | 0 |
| hsa-223    | 520  | 2706  | 0.03 | 0.64  | 520  | 2706  | 0.006 | 0 | 0 | 0 | 0 |
| hsa-let-7g | 1157 | 2654  | 0.03 | 0.63  | 1157 | 2654  | 0.006 | 0 | 0 | 0 | 0 |
| hsa-23a    | 481  | 2603  | 0.03 | 0.62  | 481  | 2603  | 0.006 | 0 | 0 | 0 | 0 |
| hsa-let-7a | 526  | 2510  | 0.03 | 0.59  | 526  | 2510  | 0.006 | 0 | 0 | 0 | 0 |
| hsa-34a    | 1085 | 2387  | 0.03 | 0.57  | 1085 | 2387  | 0.006 | 0 | 0 | 0 | 0 |
| hsa-200c   | 978  | 2237  | 0.02 | 0.53  | 978  | 2237  | 0.005 | 0 | 0 | 0 | 0 |
| hsa-30e    | 1355 | 2225  | 0.02 | 0.53  | 1355 | 2225  | 0.005 | 0 | 0 | 0 | 0 |
| hsa-92a    | 1012 | 2215  | 0.02 | 0.53  | 1012 | 2215  | 0.005 | 0 | 0 | 0 | 0 |
| hsa-30d    | 1070 | 2182  | 0.02 | 0.52  | 1070 | 2182  | 0.005 | 0 | 0 | 0 | 0 |
| hsa-140    | 947  | 2163  | 0.02 | 0.51  | 947  | 2163  | 0.005 | 0 | 0 | 0 | 0 |
| hsa-125a   | 621  | 2067  | 0.02 | 0.49  | 621  | 2067  | 0.005 | 0 | 0 | 0 | 0 |
| hsa-660    | 957  | 1842  | 0.02 | 0.44  | 957  | 1842  | 0.004 | 0 | 0 | 0 | 0 |
| hsa-199a   | 833  | 1837  | 0.02 | 0.44  | 833  | 1837  | 0.004 | 0 | 0 | 0 | 0 |
| hsa-19a    | 559  | 1629  | 0.02 | 0.39  | 559  | 1629  | 0.004 | 0 | 0 | 0 | 0 |
| hsa-26b    | 759  | 1547  | 0.02 | 0.37  | 759  | 1547  | 0.004 | 0 | 0 | 0 | 0 |
| hsa-99a    | 817  | 1514  | 0.02 | 0.36  | 817  | 1514  | 0.004 | 0 | 0 | 0 | 0 |
| hsa-15b    | 934  | 1504  | 0.02 | 0.36  | 934  | 1504  | 0.004 | 0 | 0 | 0 | 0 |
| hsa-let-7i | 756  | 1428  | 0.02 | 0.34  | 756  | 1428  | 0.003 | 0 | 0 | 0 | 0 |
| hsa-429    | 552  | 1398  | 0.02 | 0.33  | 552  | 1398  | 0.003 | 0 | 0 | 0 | 0 |
| hsa-181a   | 953  | 1387  | 0.02 | 0.33  | 953  | 1387  | 0.003 | 0 | 0 | 0 | 0 |
| hsa-484    | 493  | 1286  | 0.01 | 0.31  | 493  | 1286  | 0.003 | 0 | 0 | 0 | 0 |
| hsa-151    | 629  | 1276  | 0.01 | 0.3   | 629  | 1276  | 0.003 | 0 | 0 | 0 | 0 |
| hsa-126    | 786  | 1180  | 0.01 | 0.28  | 786  | 1180  | 0.003 | 0 | 0 | 0 | 0 |
| hsa-30c    | 286  | 1154  | 0.01 | 0.27  | 286  | 1154  | 0.003 | 0 | 0 | 0 | 0 |
| hsa-195    | 578  | 1129  | 0.01 | 0.27  | 578  | 1129  | 0.003 | 0 | 0 | 0 | 0 |
| hsa-574    | 813  | 1122  | 0.01 | 0.27  | 813  | 1122  | 0.003 | 0 | 0 | 0 | 0 |
| hsa-27a    | 518  | 1102  | 0.01 | 0.26  | 518  | 1102  | 0.003 | 0 | 0 | 0 | 0 |
| hsa-424    | 490  | 970   | 0.01 | 0.23  | 490  | 970   | 0.002 | 0 | 0 | 0 | 0 |
| hsa-210    | 599  | 967   | 0.01 | 0.23  | 599  | 967   | 0.002 | 0 | 0 | 0 | 0 |
| hsa-125b   | 425  | 962   | 0.01 | 0.23  | 425  | 962   | 0.002 | 0 | 0 | 0 | 0 |
| hsa-22     | 495  | 943   | 0.01 | 0.22  | 495  | 943   | 0.002 | 0 | 0 | 0 | 0 |



|            |     |     |      | Ref  |     |     |       |   |   |   |   |
|------------|-----|-----|------|------|-----|-----|-------|---|---|---|---|
| hsa-221    | 601 | 931 | 0.01 | 0.22 | 601 | 931 | 0.002 | 0 | 0 | 0 | 0 |
| hsa-15a    | 669 | 925 | 0.01 | 0.22 | 669 | 925 | 0.002 | 0 | 0 | 0 | 0 |
| hsa-1826   | 509 | 904 | 0.01 | 0.21 | 509 | 904 | 0.002 | 0 | 0 | 0 | 0 |
| hsa-30a    | 509 | 798 | 0.01 | 0.19 | 509 | 798 | 0.002 | 0 | 0 | 0 | 0 |
| hsa-338    | 400 | 777 | 0.01 | 0.18 | 400 | 777 | 0.002 | 0 | 0 | 0 | 0 |
| hsa-150    | 392 | 756 | 0.01 | 0.18 | 392 | 756 | 0.002 | 0 | 0 | 0 | 0 |
| hsa-20a    | 384 | 697 | 0.01 | 0.17 | 384 | 697 | 0.002 | 0 | 0 | 0 | 0 |
| hsa-181b   | 433 | 695 | 0.01 | 0.17 | 433 | 695 | 0.002 | 0 | 0 | 0 | 0 |
| hsa-let-7d | 374 | 687 | 0.01 | 0.16 | 374 | 687 | 0.002 | 0 | 0 | 0 | 0 |
| hsa-590    | 333 | 667 | 0.01 | 0.16 | 333 | 667 | 0.002 | 0 | 0 | 0 | 0 |
| hsa-203    | 394 | 644 | 0.01 | 0.15 | 394 | 644 | 0.002 | 0 | 0 | 0 | 0 |
| hsa-222    | 394 | 639 | 0.01 | 0.15 | 394 | 639 | 0.002 | 0 | 0 | 0 | 0 |
| hsa-204    | 349 | 609 | 0.01 | 0.14 | 349 | 609 | 0.001 | 0 | 0 | 0 | 0 |
| hsa-25     | 318 | 580 | 0.01 | 0.14 | 318 | 580 | 0.001 | 0 | 0 | 0 | 0 |
| hsa-186    | 346 | 574 | 0.01 | 0.14 | 346 | 574 | 0.001 | 0 | 0 | 0 | 0 |
| has-7      | 380 | 573 | 0.01 | 0.14 | 380 | 573 | 0.001 | 0 | 0 | 0 | 0 |
| hsa-365    | 192 | 504 | 0.01 | 0.12 | 192 | 504 | 0.001 | 0 | 0 | 0 | 0 |
| hsa-let-7e | 336 | 481 | 0.01 | 0.11 | 336 | 481 | 0.001 | 0 | 0 | 0 | 0 |
| hsa-28     | 321 | 472 | 0.01 | 0.11 | 321 | 472 | 0.001 | 0 | 0 | 0 | 0 |
| hsa-27b    | 220 | 452 | 0.01 | 0.11 | 220 | 452 | 0.001 | 0 | 0 | 0 | 0 |
| hsa-532    | 310 | 448 | 0.01 | 0.11 | 310 | 448 | 0.001 | 0 | 0 | 0 | 0 |
| hsa-130a   | 299 | 445 | 0.01 | 0.11 | 299 | 445 | 0.001 | 0 | 0 | 0 | 0 |
| hsa-574    | 248 | 428 | 0.01 | 0.1  | 248 | 428 | 0.001 | 0 | 0 | 0 | 0 |
| hsa-425    | 257 | 405 | 0    | 0.1  | 257 | 405 | 0.001 | 0 | 0 | 0 | 0 |
| hsa-16     | 354 | 402 | 0    | 0.1  | 354 | 402 | 0.001 | 0 | 0 | 0 | 0 |
| hsa-148b   | 196 | 372 | 0    | 0.09 | 196 | 372 | 0.001 | 0 | 0 | 0 | 0 |
| hsa-193a   | 196 | 361 | 0    | 0.09 | 196 | 361 | 0.001 | 0 | 0 | 0 | 0 |
| hsa-331    | 273 | 359 | 0    | 0.09 | 273 | 359 | 0.001 | 0 | 0 | 0 | 0 |
| hsa-138    | 215 | 350 | 0    | 0.08 | 215 | 350 | 0.001 | 0 | 0 | 0 | 0 |
| hsa-let-7c | 178 | 341 | 0    | 0.08 | 178 | 341 | 0.001 | 0 | 0 | 0 | 0 |
| hsa-182    | 202 | 310 | 0    | 0.07 | 202 | 310 | 0.001 | 0 | 0 | 0 | 0 |
| hsa-193b   | 215 | 307 | 0    | 0.07 | 215 | 307 | 0.001 | 0 | 0 | 0 | 0 |
| hsa-497    | 183 | 303 | 0    | 0.07 | 183 | 303 | 0.001 | 0 | 0 | 0 | 0 |
| hsa-423    | 204 | 298 | 0    | 0.07 | 204 | 298 | 0.001 | 0 | 0 | 0 | 0 |
| hsa-339    | 178 | 294 | 0    | 0.07 | 178 | 294 | 0.001 | 0 | 0 | 0 | 0 |
| hsa-140    | 213 | 293 | 0    | 0.07 | 213 | 293 | 0.001 | 0 | 0 | 0 | 0 |
| hsa-142    | 245 | 293 | 0    | 0.07 | 245 | 293 | 0.001 | 0 | 0 | 0 | 0 |
| hsa-362    | 165 | 293 | 0    | 0.07 | 165 | 293 | 0.001 | 0 | 0 | 0 | 0 |
| hsa-345    | 256 | 286 | 0    | 0.07 | 256 | 286 | 0.001 | 0 | 0 | 0 | 0 |
| hsa-146b   | 188 | 283 | 0    | 0.07 | 188 | 283 | 0.001 | 0 | 0 | 0 | 0 |
| hsa-361    | 190 | 282 | 0    | 0.07 | 190 | 282 | 0.001 | 0 | 0 | 0 | 0 |
| hsa-155    | 200 | 254 | 0    | 0.06 | 200 | 254 | 0.001 | 0 | 0 | 0 | 0 |
| hsa-582    | 151 | 247 | 0    | 0.06 | 151 | 247 | 0.001 | 0 | 0 | 0 | 0 |
| hsa-146a   | 198 | 242 | 0    | 0.06 | 198 | 242 | 0.001 | 0 | 0 | 0 | 0 |
| hsa-374b   | 205 | 240 | 0    | 0.06 | 205 | 240 | 0.001 | 0 | 0 | 0 | 0 |
| hsa-20b    | 151 | 230 | 0    | 0.05 | 151 | 230 | 0.001 | 0 | 0 | 0 | 0 |
| hsa-142    | 185 | 227 | 0    | 0.05 | 185 | 227 | 0.001 | 0 | 0 | 0 | 0 |
| hsa-502    | 158 | 226 | 0    | 0.05 | 158 | 226 | 0.001 | 0 | 0 | 0 | 0 |
| hsa-130b   | 171 | 215 | 0    | 0.05 | 171 | 215 | 0.001 | 0 | 0 | 0 | 0 |
| hsa-28     | 141 | 213 | 0    | 0.05 | 141 | 213 | 0.001 | 0 | 0 | 0 | 0 |
| hsa-342    | 156 | 196 | 0    | 0.05 | 156 | 196 | 0.000 | 0 | 0 | 0 | 0 |
| hsa-361    | 168 | 192 | 0    | 0.05 | 168 | 192 | 0.000 | 0 | 0 | 0 | 0 |
| hsa-135a   | 123 | 186 | 0    | 0.04 | 123 | 186 | 0.000 | 0 | 0 | 0 | 0 |
| hsa-218    | 106 | 183 | 0    | 0.04 | 106 | 183 | 0.000 | 0 | 0 | 0 | 0 |
| hsa-194    | 129 | 178 | 0    | 0.04 | 129 | 178 | 0.000 | 0 | 0 | 0 | 0 |
| hsa-1259   | 15  | 172 | 0    | 0.04 | 15  | 172 | 0.000 | 0 | 0 | 0 | 0 |
| hsa-362    | 134 | 169 | 0    | 0.04 | 134 | 169 | 0.000 | 0 | 0 | 0 | 0 |
| hsa-320a   | 90  | 151 | 0    | 0.04 | 90  | 151 | 0.000 | 0 | 0 | 0 | 0 |

|          |     |     |   | Ref  |     |     |       |   |   |   |   |
|----------|-----|-----|---|------|-----|-----|-------|---|---|---|---|
| hsa-455  | 117 | 145 | 0 | 0.03 | 117 | 145 | 0.000 | 0 | 0 | 0 | 0 |
| hsa-505  | 133 | 145 | 0 | 0.03 | 133 | 145 | 0.000 | 0 | 0 | 0 | 0 |
| hsa-151  | 113 | 141 | 0 | 0.03 | 113 | 141 | 0.000 | 0 | 0 | 0 | 0 |
| hsa-301a | 105 | 137 | 0 | 0.03 | 105 | 137 | 0.000 | 0 | 0 | 0 | 0 |
| hsa-664  | 87  | 135 | 0 | 0.03 | 87  | 135 | 0.000 | 0 | 0 | 0 | 0 |
| hsa-326  | 96  | 131 | 0 | 0.03 | 96  | 131 | 0.000 | 0 | 0 | 0 | 0 |
| hsa-185  | 111 | 130 | 0 | 0.03 | 111 | 130 | 0.000 | 0 | 0 | 0 | 0 |
| hsa-152  | 116 | 128 | 0 | 0.03 | 116 | 128 | 0.000 | 0 | 0 | 0 | 0 |
| hsa-363  | 98  | 126 | 0 | 0.03 | 98  | 126 | 0.000 | 0 | 0 | 0 | 0 |
| hsa-128  | 84  | 125 | 0 | 0.03 | 84  | 125 | 0.000 | 0 | 0 | 0 | 0 |
| hsa-183  | 98  | 120 | 0 | 0.03 | 98  | 120 | 0.000 | 0 | 0 | 0 | 0 |
| hsa-188  | 109 | 120 | 0 | 0.03 | 109 | 120 | 0.000 | 0 | 0 | 0 | 0 |
| hsa-139  | 89  | 118 | 0 | 0.03 | 89  | 118 | 0.000 | 0 | 0 | 0 | 0 |
| hsa-768  | 69  | 118 | 0 | 0.03 | 69  | 118 | 0.000 | 0 | 0 | 0 | 0 |
| hsa-598  | 83  | 116 | 0 | 0.03 | 83  | 116 | 0.000 | 0 | 0 | 0 | 0 |
| hsa-324  | 103 | 113 | 0 | 0.03 | 103 | 113 | 0.000 | 0 | 0 | 0 | 0 |
| hsa-708  | 94  | 111 | 0 | 0.03 | 94  | 111 | 0.000 | 0 | 0 | 0 | 0 |
| hsa-132  | 92  | 106 | 0 | 0.03 | 92  | 106 | 0.000 | 0 | 0 | 0 | 0 |
| hsa-551b | 72  | 106 | 0 | 0.03 | 72  | 106 | 0.000 | 0 | 0 | 0 | 0 |
| hsa-542  | 67  | 103 | 0 | 0.02 | 67  | 103 | 0.000 | 0 | 0 | 0 | 0 |
| hsa-32   | 68  | 99  | 0 | 0.02 | 68  | 99  | 0.000 | 0 | 0 | 0 | 0 |
| hsa-136  | 72  | 94  | 0 | 0.02 | 72  | 94  | 0.000 | 0 | 0 | 0 | 0 |
| hsa-193a | 69  | 94  | 0 | 0.02 | 69  | 94  | 0.000 | 0 | 0 | 0 | 0 |
| hsa-215  | 68  | 93  | 0 | 0.02 | 68  | 93  | 0.000 | 0 | 0 | 0 | 0 |
| hsa-886  | 38  | 92  | 0 | 0.02 | 38  | 92  | 0.000 | 0 | 0 | 0 | 0 |
| hsa-92b  | 78  | 90  | 0 | 0.02 | 78  | 90  | 0.000 | 0 | 0 | 0 | 0 |
| hsa-33a  | 74  | 89  | 0 | 0.02 | 74  | 89  | 0.000 | 0 | 0 | 0 | 0 |
| hsa-18a  | 67  | 85  | 0 | 0.02 | 67  | 85  | 0.000 | 0 | 0 | 0 | 0 |
| hsa-768  | 40  | 85  | 0 | 0.02 | 40  | 85  | 0.000 | 0 | 0 | 0 | 0 |
| hsa-1248 | 51  | 83  | 0 | 0.02 | 51  | 83  | 0.000 | 0 | 0 | 0 | 0 |
| hsa-324  | 81  | 83  | 0 | 0.02 | 81  | 83  | 0.000 | 0 | 0 | 0 | 0 |
| hsa-455  | 67  | 83  | 0 | 0.02 | 67  | 83  | 0.000 | 0 | 0 | 0 | 0 |
| hsa-135b | 57  | 75  | 0 | 0.02 | 57  | 75  | 0.000 | 0 | 0 | 0 | 0 |
| hsa-340  | 55  | 75  | 0 | 0.02 | 55  | 75  | 0.000 | 0 | 0 | 0 | 0 |
| hsa-744  | 58  | 75  | 0 | 0.02 | 58  | 75  | 0.000 | 0 | 0 | 0 | 0 |
| hsa-99b  | 74  | 74  | 0 | 0.02 | 74  | 74  | 0.000 | 0 | 0 | 0 | 0 |
| hsa-500  | 57  | 72  | 0 | 0.02 | 57  | 72  | 0.000 | 0 | 0 | 0 | 0 |
| hsa-376c | 54  | 71  | 0 | 0.02 | 54  | 71  | 0.000 | 0 | 0 | 0 | 0 |
| hsa-501  | 58  | 68  | 0 | 0.02 | 58  | 68  | 0.000 | 0 | 0 | 0 | 0 |
| hsa-1280 | 57  | 65  | 0 | 0.02 | 57  | 65  | 0.000 | 0 | 0 | 0 | 0 |
| hsa-450a | 45  | 63  | 0 | 0.02 | 45  | 63  | 0.000 | 0 | 0 | 0 | 0 |
| hsa-335  | 53  | 61  | 0 | 0.01 | 53  | 61  | 0.000 | 0 | 0 | 0 | 0 |
| hsa-338  | 53  | 61  | 0 | 0.01 | 53  | 61  | 0.000 | 0 | 0 | 0 | 0 |
| hsa-886  | 31  | 60  | 0 | 0.01 | 31  | 60  | 0.000 | 0 | 0 | 0 | 0 |
| hsa-320d | 49  | 57  | 0 | 0.01 | 49  | 57  | 0.000 | 0 | 0 | 0 | 0 |
| hsa-98   | 53  | 56  | 0 | 0.01 | 53  | 56  | 0.000 | 0 | 0 | 0 | 0 |
| hsa-320b | 43  | 54  | 0 | 0.01 | 43  | 54  | 0.000 | 0 | 0 | 0 | 0 |
| hsa-652  | 53  | 54  | 0 | 0.01 | 53  | 54  | 0.000 | 0 | 0 | 0 | 0 |
| hsa-1297 | 35  | 53  | 0 | 0.01 | 35  | 53  | 0.000 | 0 | 0 | 0 | 0 |
| hsa-495  | 38  | 53  | 0 | 0.01 | 38  | 53  | 0.000 | 0 | 0 | 0 | 0 |
| hsa-873  | 40  | 53  | 0 | 0.01 | 40  | 53  | 0.000 | 0 | 0 | 0 | 0 |
| hsa-95   | 43  | 53  | 0 | 0.01 | 43  | 53  | 0.000 | 0 | 0 | 0 | 0 |
| hsa-887  | 48  | 52  | 0 | 0.01 | 48  | 52  | 0.000 | 0 | 0 | 0 | 0 |
| hsa-328  | 46  | 49  | 0 | 0.01 | 46  | 49  | 0.000 | 0 | 0 | 0 | 0 |
| hsa-214  | 48  | 48  | 0 | 0.01 | 48  | 48  | 0.000 | 0 | 0 | 0 | 0 |
| hsa-503  | 44  | 48  | 0 | 0.01 | 44  | 48  | 0.000 | 0 | 0 | 0 | 0 |
| hsa-494  | 32  | 44  | 0 | 0.01 | 32  | 44  | 0.000 | 0 | 0 | 0 | 0 |
| hsa-874  | 32  | 44  | 0 | 0.01 | 32  | 44  | 0.000 | 0 | 0 | 0 | 0 |

|           |    |    |   | Ref  |    |    |       |   |   |   |   |
|-----------|----|----|---|------|----|----|-------|---|---|---|---|
| hsa-181c  | 42 | 43 | 0 | 0.01 | 42 | 43 | 0.000 | 0 | 0 | 0 | 0 |
| hsa-487b  | 34 | 43 | 0 | 0.01 | 34 | 43 | 0.000 | 0 | 0 | 0 | 0 |
| hsa-532   | 42 | 43 | 0 | 0.01 | 42 | 43 | 0.000 | 0 | 0 | 0 | 0 |
| hsa-374a  | 38 | 40 | 0 | 0.01 | 38 | 40 | 0.000 | 0 | 0 | 0 | 0 |
| hsa-940   | 36 | 39 | 0 | 0.01 | 36 | 39 | 0.000 | 0 | 0 | 0 | 0 |
| hsa-211   | 28 | 38 | 0 | 0.01 | 28 | 38 | 0.000 | 0 | 0 | 0 | 0 |
| hsa-423   | 34 | 38 | 0 | 0.01 | 34 | 38 | 0.000 | 0 | 0 | 0 | 0 |
| hsa-379   | 37 | 37 | 0 | 0.01 | 37 | 37 | 0.000 | 0 | 0 | 0 | 0 |
| hsa-421   | 37 | 37 | 0 | 0.01 | 37 | 37 | 0.000 | 0 | 0 | 0 | 0 |
| hsa-96    | 36 | 37 | 0 | 0.01 | 36 | 37 | 0.000 | 0 | 0 | 0 | 0 |
| hsa-339   | 30 | 32 | 0 | 0.01 | 30 | 32 | 0.000 | 0 | 0 | 0 | 0 |
| hsa-671   | 32 | 32 | 0 | 0.01 | 32 | 32 | 0.000 | 0 | 0 | 0 | 0 |
| hsa-1307  | 31 | 31 | 0 | 0.01 | 31 | 31 | 0.000 | 0 | 0 | 0 | 0 |
| hsa-33b   | 28 | 31 | 0 | 0.01 | 28 | 31 | 0.000 | 0 | 0 | 0 | 0 |
| hsa-342   | 30 | 31 | 0 | 0.01 | 30 | 31 | 0.000 | 0 | 0 | 0 | 0 |
| hsa-224   | 28 | 30 | 0 | 0.01 | 28 | 30 | 0.000 | 0 | 0 | 0 | 0 |
| hsa-625   | 26 | 29 | 0 | 0.01 | 26 | 29 | 0.000 | 0 | 0 | 0 | 0 |
| hsa-769   | 27 | 28 | 0 | 0.01 | 27 | 28 | 0.000 | 0 | 0 | 0 | 0 |
| hsa-190   | 25 | 27 | 0 | 0.01 | 25 | 27 | 0.000 | 0 | 0 | 0 | 0 |
| hsa-197   | 25 | 26 | 0 | 0.01 | 25 | 26 | 0.000 | 0 | 0 | 0 | 0 |
| hsa-337   | 23 | 26 | 0 | 0.01 | 23 | 26 | 0.000 | 0 | 0 | 0 | 0 |
| hsa-382   | 25 | 26 | 0 | 0.01 | 25 | 26 | 0.000 | 0 | 0 | 0 | 0 |
| hsa-582   | 23 | 25 | 0 | 0.01 | 23 | 25 | 0.000 | 0 | 0 | 0 | 0 |
| hsa-766   | 20 | 25 | 0 | 0.01 | 20 | 25 | 0.000 | 0 | 0 | 0 | 0 |
| has-9     | 21 | 24 | 0 | 0.01 | 21 | 24 | 0.000 | 0 | 0 | 0 | 0 |
| hsa-212   | 22 | 22 | 0 | 0.01 | 22 | 22 | 0.000 | 0 | 0 | 0 | 0 |
| hsa-628   | 20 | 22 | 0 | 0.01 | 20 | 22 | 0.000 | 0 | 0 | 0 | 0 |
| hsa-127   | 20 | 20 | 0 | 0.01 | 20 | 20 | 0.000 | 0 | 0 | 0 | 0 |
| hsa-153   | 20 | 20 | 0 | 0.01 | 20 | 20 | 0.000 | 0 | 0 | 0 | 0 |
| hsa-330   | 19 | 20 | 0 | 0.01 | 19 | 20 | 0.000 | 0 | 0 | 0 | 0 |
| hsa-1270  | 15 | 19 | 0 | 0    | 15 | 19 | 0.000 | 0 | 0 | 0 | 0 |
| hsa-320c  | 18 | 19 | 0 | 0    | 18 | 19 | 0.000 | 0 | 0 | 0 | 0 |
| hsa-409   | 18 | 19 | 0 | 0    | 18 | 19 | 0.000 | 0 | 0 | 0 | 0 |
| hsa-629   | 17 | 19 | 0 | 0    | 17 | 19 | 0.000 | 0 | 0 | 0 | 0 |
| hsa-1246  | 17 | 17 | 0 | 0    | 17 | 17 | 0.000 | 0 | 0 | 0 | 0 |
| hsa-1274b | 17 | 17 | 0 | 0    | 17 | 17 | 0.000 | 0 | 0 | 0 | 0 |
| hsa-1301  | 17 | 17 | 0 | 0    | 17 | 17 | 0.000 | 0 | 0 | 0 | 0 |
| hsa-18b   | 16 | 17 | 0 | 0    | 16 | 17 | 0.000 | 0 | 0 | 0 | 0 |
| hsa-545   | 14 | 17 | 0 | 0    | 14 | 17 | 0.000 | 0 | 0 | 0 | 0 |
| hsa-720   | 16 | 17 | 0 | 0    | 16 | 17 | 0.000 | 0 | 0 | 0 | 0 |
| hsa-1271  | 15 | 16 | 0 | 0    | 15 | 16 | 0.000 | 0 | 0 | 0 | 0 |
| hsa-452   | 12 | 16 | 0 | 0    | 12 | 16 | 0.000 | 0 | 0 | 0 | 0 |
| hsa-654   | 12 | 16 | 0 | 0    | 12 | 16 | 0.000 | 0 | 0 | 0 | 0 |
| hsa-301b  | 12 | 15 | 0 | 0    | 12 | 15 | 0.000 | 0 | 0 | 0 | 0 |
| hsa-337   | 15 | 15 | 0 | 0    | 15 | 15 | 0.000 | 0 | 0 | 0 | 0 |
| hsa-149   | 13 | 14 | 0 | 0    | 13 | 14 | 0.000 | 0 | 0 | 0 | 0 |
| hsa-181d  | 14 | 14 | 0 | 0    | 14 | 14 | 0.000 | 0 | 0 | 0 | 0 |
| hsa-34c   | 13 | 13 | 0 | 0    | 13 | 13 | 0.000 | 0 | 0 | 0 | 0 |
| hsa-543   | 13 | 13 | 0 | 0    | 13 | 13 | 0.000 | 0 | 0 | 0 | 0 |
| hsa-576   | 12 | 13 | 0 | 0    | 12 | 13 | 0.000 | 0 | 0 | 0 | 0 |
| hsa-579   | 13 | 13 | 0 | 0    | 13 | 13 | 0.000 | 0 | 0 | 0 | 0 |
| hsa-876   | 12 | 13 | 0 | 0    | 12 | 13 | 0.000 | 0 | 0 | 0 | 0 |
| hsa-1285  | 12 | 12 | 0 | 0    | 12 | 12 | 0.000 | 0 | 0 | 0 | 0 |
| hsa-486   | 11 | 12 | 0 | 0    | 11 | 12 | 0.000 | 0 | 0 | 0 | 0 |
| hsa-642   | 11 | 12 | 0 | 0    | 11 | 12 | 0.000 | 0 | 0 | 0 | 0 |
| hsa-1268  | 10 | 11 | 0 | 0    | 10 | 11 | 0.000 | 0 | 0 | 0 | 0 |
| hsa-154   | 11 | 11 | 0 | 0    | 11 | 11 | 0.000 | 0 | 0 | 0 | 0 |
| hsa-370   | 11 | 11 | 0 | 0    | 11 | 11 | 0.000 | 0 | 0 | 0 | 0 |

|           |    |    |   | Ref |    |    |       |   |   |   |   |
|-----------|----|----|---|-----|----|----|-------|---|---|---|---|
| hsa-590   | 7  | 11 | 0 | 0   | 7  | 11 | 0.000 | 0 | 0 | 0 | 0 |
| hsa-1249  | 9  | 10 | 0 | 0   | 9  | 10 | 0.000 | 0 | 0 | 0 | 0 |
| hsa-1287  | 10 | 10 | 0 | 0   | 10 | 10 | 0.000 | 0 | 0 | 0 | 0 |
| hsa-381   | 7  | 10 | 0 | 0   | 7  | 10 | 0.000 | 0 | 0 | 0 | 0 |
| hsa-296   | 5  | 9  | 0 | 0   | 5  | 9  | 0.000 | 0 | 0 | 0 | 0 |
| hsa-542   | 9  | 9  | 0 | 0   | 9  | 9  | 0.000 | 0 | 0 | 0 | 0 |
| hsa-671   | 9  | 9  | 0 | 0   | 9  | 9  | 0.000 | 0 | 0 | 0 | 0 |
| hsa-1181  | 8  | 8  | 0 | 0   | 8  | 8  | 0.000 | 0 | 0 | 0 | 0 |
| hsa-1247  | 7  | 8  | 0 | 0   | 7  | 8  | 0.000 | 0 | 0 | 0 | 0 |
| hsa-147b  | 7  | 8  | 0 | 0   | 7  | 8  | 0.000 | 0 | 0 | 0 | 0 |
| hsa-330   | 8  | 8  | 0 | 0   | 8  | 8  | 0.000 | 0 | 0 | 0 | 0 |
| hsa-627   | 8  | 8  | 0 | 0   | 8  | 8  | 0.000 | 0 | 0 | 0 | 0 |
| hsa-876   | 8  | 8  | 0 | 0   | 8  | 8  | 0.000 | 0 | 0 | 0 | 0 |
| hsa-1275  | 7  | 7  | 0 | 0   | 7  | 7  | 0.000 | 0 | 0 | 0 | 0 |
| hsa-144   | 7  | 7  | 0 | 0   | 7  | 7  | 0.000 | 0 | 0 | 0 | 0 |
| hsa-409   | 7  | 7  | 0 | 0   | 7  | 7  | 0.000 | 0 | 0 | 0 | 0 |
| hsa-584   | 7  | 7  | 0 | 0   | 7  | 7  | 0.000 | 0 | 0 | 0 | 0 |
| hsa-589   | 7  | 7  | 0 | 0   | 7  | 7  | 0.000 | 0 | 0 | 0 | 0 |
| hsa-1     | 6  | 6  | 0 | 0   | 6  | 6  | 0.000 | 0 | 0 | 0 | 0 |
| hsa-125a  | 6  | 6  | 0 | 0   | 6  | 6  | 0.000 | 0 | 0 | 0 | 0 |
| hsa-329   | 6  | 6  | 0 | 0   | 6  | 6  | 0.000 | 0 | 0 | 0 | 0 |
| hsa-331   | 6  | 6  | 0 | 0   | 6  | 6  | 0.000 | 0 | 0 | 0 | 0 |
| hsa-369   | 6  | 6  | 0 | 0   | 6  | 6  | 0.000 | 0 | 0 | 0 | 0 |
| hsa-432   | 6  | 6  | 0 | 0   | 6  | 6  | 0.000 | 0 | 0 | 0 | 0 |
| hsa-483   | 6  | 6  | 0 | 0   | 6  | 6  | 0.000 | 0 | 0 | 0 | 0 |
| hsa-127   | 5  | 5  | 0 | 0   | 5  | 5  | 0.000 | 0 | 0 | 0 | 0 |
| hsa-299   | 5  | 5  | 0 | 0   | 5  | 5  | 0.000 | 0 | 0 | 0 | 0 |
| hsa-299   | 4  | 5  | 0 | 0   | 4  | 5  | 0.000 | 0 | 0 | 0 | 0 |
| hsa-369   | 5  | 5  | 0 | 0   | 5  | 5  | 0.000 | 0 | 0 | 0 | 0 |
| hsa-486   | 5  | 5  | 0 | 0   | 5  | 5  | 0.000 | 0 | 0 | 0 | 0 |
| hsa-665   | 5  | 5  | 0 | 0   | 5  | 5  | 0.000 | 0 | 0 | 0 | 0 |
| hsa-122   | 3  | 4  | 0 | 0   | 3  | 4  | 0.000 | 0 | 0 | 0 | 0 |
| hsa-1229  | 4  | 4  | 0 | 0   | 4  | 4  | 0.000 | 0 | 0 | 0 | 0 |
| hsa-491   | 4  | 4  | 0 | 0   | 4  | 4  | 0.000 | 0 | 0 | 0 | 0 |
| hsa-499   | 4  | 4  | 0 | 0   | 4  | 4  | 0.000 | 0 | 0 | 0 | 0 |
| hsa-615   | 4  | 4  | 0 | 0   | 4  | 4  | 0.000 | 0 | 0 | 0 | 0 |
| hsa-641   | 3  | 4  | 0 | 0   | 3  | 4  | 0.000 | 0 | 0 | 0 | 0 |
| hsa-656   | 1  | 4  | 0 | 0   | 1  | 4  | 0.000 | 0 | 0 | 0 | 0 |
| hsa-769   | 4  | 4  | 0 | 0   | 4  | 4  | 0.000 | 0 | 0 | 0 | 0 |
| hsa-877   | 4  | 4  | 0 | 0   | 4  | 4  | 0.000 | 0 | 0 | 0 | 0 |
| hsa-1224  | 3  | 3  | 0 | 0   | 3  | 3  | 0.000 | 0 | 0 | 0 | 0 |
| hsa-133a  | 3  | 3  | 0 | 0   | 3  | 3  | 0.000 | 0 | 0 | 0 | 0 |
| hsa-146b  | 3  | 3  | 0 | 0   | 3  | 3  | 0.000 | 0 | 0 | 0 | 0 |
| hsa-1827  | 3  | 3  | 0 | 0   | 3  | 3  | 0.000 | 0 | 0 | 0 | 0 |
| hsa-205   | 3  | 3  | 0 | 0   | 3  | 3  | 0.000 | 0 | 0 | 0 | 0 |
| hsa-450b  | 3  | 3  | 0 | 0   | 3  | 3  | 0.000 | 0 | 0 | 0 | 0 |
| hsa-487a  | 3  | 3  | 0 | 0   | 3  | 3  | 0.000 | 0 | 0 | 0 | 0 |
| hsa-493   | 3  | 3  | 0 | 0   | 3  | 3  | 0.000 | 0 | 0 | 0 | 0 |
| hsa-511   | 3  | 3  | 0 | 0   | 3  | 3  | 0.000 | 0 | 0 | 0 | 0 |
| hsa-550   | 3  | 3  | 0 | 0   | 3  | 3  | 0.000 | 0 | 0 | 0 | 0 |
| hsa-570   | 2  | 3  | 0 | 0   | 2  | 3  | 0.000 | 0 | 0 | 0 | 0 |
| hsa-942   | 3  | 3  | 0 | 0   | 3  | 3  | 0.000 | 0 | 0 | 0 | 0 |
| hsa-1236  | 2  | 2  | 0 | 0   | 2  | 2  | 0.000 | 0 | 0 | 0 | 0 |
| hsa-1250  | 2  | 2  | 0 | 0   | 2  | 2  | 0.000 | 0 | 0 | 0 | 0 |
| hsa-1274a | 2  | 2  | 0 | 0   | 2  | 2  | 0.000 | 0 | 0 | 0 | 0 |
| hsa-129   | 2  | 2  | 0 | 0   | 2  | 2  | 0.000 | 0 | 0 | 0 | 0 |
| hsa-134   | 2  | 2  | 0 | 0   | 2  | 2  | 0.000 | 0 | 0 | 0 | 0 |
| hsa-188   | 2  | 2  | 0 | 0   | 2  | 2  | 0.000 | 0 | 0 | 0 | 0 |

|           |    |   |      | Ref    |    |   |       |   |   |   |        |
|-----------|----|---|------|--------|----|---|-------|---|---|---|--------|
| hsa-190b  | 2  | 2 | 0    | 0      | 2  | 2 | 0.000 | 0 | 0 | 0 | 0      |
| hsa-219   | 2  | 2 | 0    | 0      | 2  | 2 | 0.000 | 0 | 0 | 0 | 0      |
| hsa-376a  | 1  | 2 | 0    | 0      | 1  | 2 | 0.000 | 0 | 0 | 0 | 0      |
| hsa-377   | 2  | 2 | 0    | 0      | 2  | 2 | 0.000 | 0 | 0 | 0 | 0      |
| hsa-411   | 2  | 2 | 0    | 0      | 2  | 2 | 0.000 | 0 | 0 | 0 | 0      |
| hsa-489   | 2  | 2 | 0    | 0      | 2  | 2 | 0.000 | 0 | 0 | 0 | 0      |
| hsa-548b  | 2  | 2 | 0    | 0      | 2  | 2 | 0.000 | 0 | 0 | 0 | 0      |
| hsa-577   | 2  | 2 | 0    | 0      | 2  | 2 | 0.000 | 0 | 0 | 0 | 0      |
| hsa-923   | 2  | 2 | 0    | 0      | 2  | 2 | 0.000 | 0 | 0 | 0 | 0      |
| hsa-941   | 2  | 2 | 0    | 0      | 2  | 2 | 0.000 | 0 | 0 | 0 | 0      |
| hsa-1225  | 1  | 1 | 0    | 0      | 1  | 1 | 0.000 | 0 | 0 | 0 | 0      |
| hsa-1237  | 1  | 1 | 0    | 0      | 1  | 1 | 0.000 | 0 | 0 | 0 | 0      |
| hsa-124   | 1  | 1 | 0    | 0      | 1  | 1 | 0.000 | 0 | 0 | 0 | 0      |
| hsa-1254  | 1  | 1 | 0    | 0      | 1  | 1 | 0.000 | 0 | 0 | 0 | 0      |
| hsa-1255a | 1  | 1 | 0    | 0      | 1  | 1 | 0.000 | 0 | 0 | 0 | 0      |
| hsa-1262  | 1  | 1 | 0    | 0      | 1  | 1 | 0.000 | 0 | 0 | 0 | 0      |
| hsa-1263  | 1  | 1 | 0    | 0      | 1  | 1 | 0.000 | 0 | 0 | 0 | 0      |
| hsa-1277  | 1  | 1 | 0    | 0      | 1  | 1 | 0.000 | 0 | 0 | 0 | 0      |
| hsa-1284  | 1  | 1 | 0    | 0      | 1  | 1 | 0.000 | 0 | 0 | 0 | 0      |
| hsa-129   | 1  | 1 | 0    | 0      | 1  | 1 | 0.000 | 0 | 0 | 0 | 0      |
| hsa-1290  | 1  | 1 | 0    | 0      | 1  | 1 | 0.000 | 0 | 0 | 0 | 0      |
| hsa-1296  | 1  | 1 | 0    | 0      | 1  | 1 | 0.000 | 0 | 0 | 0 | 0      |
| hsa-1306  | 1  | 1 | 0    | 0      | 1  | 1 | 0.000 | 0 | 0 | 0 | 0      |
| hsa-139   | 1  | 1 | 0    | 0      | 1  | 1 | 0.000 | 0 | 0 | 0 | 0      |
| hsa-323   | 1  | 1 | 0    | 0      | 1  | 1 | 0.000 | 0 | 0 | 0 | 0      |
| hsa-346   | 1  | 1 | 0    | 0      | 1  | 1 | 0.000 | 0 | 0 | 0 | 0      |
| hsa-34b   | 1  | 1 | 0    | 0      | 1  | 1 | 0.000 | 0 | 0 | 0 | 0      |
| hsa-34c   | 1  | 1 | 0    | 0      | 1  | 1 | 0.000 | 0 | 0 | 0 | 0      |
| hsa-380   | 1  | 1 | 0    | 0      | 1  | 1 | 0.000 | 0 | 0 | 0 | 0      |
| hsa-433   | 1  | 1 | 0    | 0      | 1  | 1 | 0.000 | 0 | 0 | 0 | 0      |
| hsa-490   | 1  | 1 | 0    | 0      | 1  | 1 | 0.000 | 0 | 0 | 0 | 0      |
| hsa-491   | 1  | 1 | 0    | 0      | 1  | 1 | 0.000 | 0 | 0 | 0 | 0      |
| hsa-514   | 1  | 1 | 0    | 0      | 1  | 1 | 0.000 | 0 | 0 | 0 | 0      |
| hsa-519d  | 1  | 1 | 0    | 0      | 1  | 1 | 0.000 | 0 | 0 | 0 | 0      |
| hsa-548a  | 1  | 1 | 0    | 0      | 1  | 1 | 0.000 | 0 | 0 | 0 | 0      |
| hsa-548e  | 1  | 1 | 0    | 0      | 1  | 1 | 0.000 | 0 | 0 | 0 | 0      |
| hsa-551a  | 1  | 1 | 0    | 0      | 1  | 1 | 0.000 | 0 | 0 | 0 | 0      |
| hsa-561   | 1  | 1 | 0    | 0      | 1  | 1 | 0.000 | 0 | 0 | 0 | 0      |
| hsa-592   | 1  | 1 | 0    | 0      | 1  | 1 | 0.000 | 0 | 0 | 0 | 0      |
| hsa-595   | 1  | 1 | 0    | 0      | 1  | 1 | 0.000 | 0 | 0 | 0 | 0      |
| hsa-597   | 1  | 1 | 0    | 0      | 1  | 1 | 0.000 | 0 | 0 | 0 | 0      |
| hsa-636   | 1  | 1 | 0    | 0      | 1  | 1 | 0.000 | 0 | 0 | 0 | 0      |
| hsa-650   | 1  | 1 | 0    | 0      | 1  | 1 | 0.000 | 0 | 0 | 0 | 0      |
| hsa-663b  | 1  | 1 | 0    | 0      | 1  | 1 | 0.000 | 0 | 0 | 0 | 0      |
| hsa-758   | 1  | 1 | 0    | 0      | 1  | 1 | 0.000 | 0 | 0 | 0 | 0      |
| hsa-765   | 1  | 1 | 0    | 0      | 1  | 1 | 0.000 | 0 | 0 | 0 | 0      |
| hsa-802   | 1  | 1 | 0    | 0      | 1  | 1 | 0.000 | 0 | 0 | 0 | 0      |
| hsa-885   | 1  | 1 | 0    | 0      | 1  | 1 | 0.000 | 0 | 0 | 0 | 0      |
| hsa-889   | 1  | 1 | 0    | 0      | 1  | 1 | 0.000 | 0 | 0 | 0 | 0      |
| hsa-890   | 1  | 1 | 0    | 0      | 1  | 1 | 0.000 | 0 | 0 | 0 | 0      |
| hsa-944   | 1  | 1 | 0    | 0      | 1  | 1 | 0.000 | 0 | 0 | 0 | 0      |
| hsa-37    | 37 | 0 | 0.01 | 37     | 37 | 0 | 0.000 | 0 | 0 | 0 | target |
|           |    |   | 4.44 | 136.04 |    |   | 1     |   |   |   |        |
