# Supplementary material for: Ultra-Deep Sequencing Reveals the microRNA Expression Pattern of the Human Stomach
Source: PLoS One. 2010 Oct 8;5(10):e13205. doi: 10.1371/journal.pone.0013205 (PMC2951895; doi:10.1371/journal.pone.0013205)
Supplement: Table S2 — Description and RT-PCR results of 10 samples from healthy individuals obtained by endoscopic biopsies. Samples size is about ∼4 mm3. For all samples were performed a histological examination and H. pylori detection. (0.03 MB XLS) [file pone.0013205.s002.xls]

## Sheet: Sheet1
sample	sex	H. pilori PCR test	Age	Tissue	mir-29a	mir-29b	mir-29c	mir-7b	mir-19b	mir-21	mir-24	mir-26	mir-31	mir-145	mir-148	mir-192	mir-200a	mir-200b	mir-451	mir-1308	Z-30	miRNARNU19	miRNARGNU
sample010	M	-	44	Cardia	23080	27913	25579	21349	24093	21671	24404	23001	24761	22513	22197	23144	22127	22913	24478	23219	30516	27445	32411
sample010	M	-	44	Cardia	22804	27995	25221	21497	24260	21912	24615	23199	24953	22533	22460	23241	22174	22807	24552	23296	30779	27616	*
sample011	F	-	43	Cardia	22544	27398	25171	21494	22023	19673	22319	22415	24290	21136	23511	21833	22529	22247	24229	20257	30021	29035	33001
sample011	F	-	43	Cardia	22572	27352	24825	21741	21879	19741	22480	22670	24477	21125	23692	21634	22514	22278	24001	20372	30036	29353	32480
sample012	F	-	51	Cardia	20524	25597	23538	19296	21040	18573	21299	20738	22060	20446	22269	19294	19618	20177	22944	20105	27124	26626	*
sample012	F	-	51	Cardia	20508	25549	23133	19363	21031	18479	21323	21198	22088	20510	22303	19247	19689	20123	22968	20075	27141	26972	31933
sample013	F	-	32	Cardia	25205	30156	27378	25465	26459	23913	25634	26187	26867	23137	25142	24546	23040	25574	26378	19266	34485	30712	30784
sample013	F	-	32	Cardia	25001	29868	27257	25488	26484	24005	25606	26558	26743	23170	25120	24531	23084	25619	26449	19297	35441	31025	30822
sample014	M	-	34	Cardia	23439	28462	25551	22148	24934	21698	23892	24169	24383	22191	23061	22346	22772	23744	25294	21403	29888	30510	32610
sample014	M	-	34	Cardia	23497	28466	25626	21956	25026	21748	23971	24032	24409	22251	23142	22383	22487	23755	25031	21498	29609	30357	33053
sample015	M	-	20	Cardia	23048	27273	26310	22718	24263	21133	24337	24065	24773	23518	25236	22245	21507	23275	23426	23037	28747	25966	31525
sample015	M	-	20	Cardia	23045	27167	26308	22529	23607	20986	24031	24055	24644	23545	25201	22148	21527	23288	23448	22939	28616	26253	31484
sample016	M	+	45	Cardia	22161	27033	25662	21637	23528	21383	23286	22556	24779	21980	24489	24187	23167	24110	26240	20821	29219	28698	31676
sample016	M	+	45	Cardia	22114	26930	26088	21369	23431	21422	23238	22536	24701	21942	24616	24156	23074	23844	26325	20715	29314	28867	31770
sample017	F	+	64	Cardia	21938	25384	24829	21315	22174	18718	22690	22134	24620	21717	23242	21699	22185	23147	23358	22343	28486	40295	31541
sample017	F	+	64	Cardia	21976	25453	24967	21298	22152	19039	22616	22128	24235	21615	23265	21595	22095	23194	23162	22400	28367	26857	31314
sample018	M	-	42	Cardia	23069	27093	25339	22160	23955	20727	24129	22839	24858	22962	23386	22666	21748	22550	25006	22237	29757	28271	33622
sample018	M	-	42	Cardia	23060	27026	25165	22049	23777	20742	24045	22699	24711	22893	23337	22273	21846	22442	25021	22105	29490	28531	32425
sample019	M	-	21	Cardia	22459	27011	25025	21156	23341	19928	23554	22291	23653	21730	22284	21318	22431	22374	23330	22086	29285	27411	31617
sample019	M	-	21	Cardia	22172	26995	24661	21096	23193	20146	23431	22229	23601	21519	22259	21186	21273	22320	23333	21933	29191	27009	31342
sample020	M	+	33	Cardia	24381	28715	26861	23999	25684	22192	25766	26410	26699	24136	24990	24965	24657	27105	28862	19309	32436	28793	29919
sample020	M	+	33	Cardia	24267	28636	26601	23876	25563	22381	27078	26316	26723	24090	24926	24974	27318	26904	28565	19232	32132	28688	29631
